# Supplementary material for: Dissemination of information in event-based surveillance, a case study of Avian Influenza
Source: PubMed Central journal article supplement (PMC10479896; doi:10.1371/journal.pone.0285341), 2023-09-05
Supplement: pone.0285341.s011.pdf [file pone.0285341.s011.pdf]

## S1 File. Statistical comparison of the sensitivity of PADI-web and HealthMap networks.

```
contingency_table <-  
matrix(c(33, 166, 27, 125),  
       nrow = 2,  
       dimnames = list("HealthMap" = c("Detected", "Not detected"),  
                       "PADI-web" = c("Detected", "Not detected")))  
print(contingency_table)
```

```
##           PADI-web  
## HealthMap   Detected Not detected  
## Detected           33           27  
## Not detected       166           125
```

```
mcnemar.test(contingency_table, correct=FALSE)
```

```
##  
## McNemar's Chi-squared test  
##  
## data:  contingency_table  
## McNemar's chi-squared = 100.11, df = 1, p-value < 2.2e-16
```
