# Supplementary material for: Dissemination of information in event-based surveillance, a case study of Avian Influenza
Source: PubMed Central journal article supplement (PMC10479896; doi:10.1371/journal.pone.0285341), 2023-09-05
Supplement: pone.0285341.s015.pdf [file pone.0285341.s015.pdf]

# PLOS ONE

## Dissemination of information in event-based surveillance, a case study of Avian Influenza --Manuscript Draft--

|                               |                                                                                                                                                                                                                                                                                                                                                                                                                                                                                                                                                                                                                                                                                                                                                                                                                                                                                                                                                                                                                                                                                                                                                                                                                                                                                                                                                                                                                                                                                                                                                                                                                                                                                                                                                                                                                                                                                                                                                                                                                                                                                                                                                                                             |
|-------------------------------|---------------------------------------------------------------------------------------------------------------------------------------------------------------------------------------------------------------------------------------------------------------------------------------------------------------------------------------------------------------------------------------------------------------------------------------------------------------------------------------------------------------------------------------------------------------------------------------------------------------------------------------------------------------------------------------------------------------------------------------------------------------------------------------------------------------------------------------------------------------------------------------------------------------------------------------------------------------------------------------------------------------------------------------------------------------------------------------------------------------------------------------------------------------------------------------------------------------------------------------------------------------------------------------------------------------------------------------------------------------------------------------------------------------------------------------------------------------------------------------------------------------------------------------------------------------------------------------------------------------------------------------------------------------------------------------------------------------------------------------------------------------------------------------------------------------------------------------------------------------------------------------------------------------------------------------------------------------------------------------------------------------------------------------------------------------------------------------------------------------------------------------------------------------------------------------------|
| <b>Manuscript Number:</b>     | PONE-D-22-24102R1                                                                                                                                                                                                                                                                                                                                                                                                                                                                                                                                                                                                                                                                                                                                                                                                                                                                                                                                                                                                                                                                                                                                                                                                                                                                                                                                                                                                                                                                                                                                                                                                                                                                                                                                                                                                                                                                                                                                                                                                                                                                                                                                                                           |
| <b>Article Type:</b>          | Research Article                                                                                                                                                                                                                                                                                                                                                                                                                                                                                                                                                                                                                                                                                                                                                                                                                                                                                                                                                                                                                                                                                                                                                                                                                                                                                                                                                                                                                                                                                                                                                                                                                                                                                                                                                                                                                                                                                                                                                                                                                                                                                                                                                                            |
| <b>Full Title:</b>            | Dissemination of information in event-based surveillance, a case study of Avian Influenza                                                                                                                                                                                                                                                                                                                                                                                                                                                                                                                                                                                                                                                                                                                                                                                                                                                                                                                                                                                                                                                                                                                                                                                                                                                                                                                                                                                                                                                                                                                                                                                                                                                                                                                                                                                                                                                                                                                                                                                                                                                                                                   |
| <b>Short Title:</b>           | Dissemination of information in event-based surveillance                                                                                                                                                                                                                                                                                                                                                                                                                                                                                                                                                                                                                                                                                                                                                                                                                                                                                                                                                                                                                                                                                                                                                                                                                                                                                                                                                                                                                                                                                                                                                                                                                                                                                                                                                                                                                                                                                                                                                                                                                                                                                                                                    |
| <b>Corresponding Author:</b>  | Elena Arsevska<br>CIRAD<br>FRANCE                                                                                                                                                                                                                                                                                                                                                                                                                                                                                                                                                                                                                                                                                                                                                                                                                                                                                                                                                                                                                                                                                                                                                                                                                                                                                                                                                                                                                                                                                                                                                                                                                                                                                                                                                                                                                                                                                                                                                                                                                                                                                                                                                           |
| <b>Keywords:</b>              | event-based surveillance; digital disease detection; network analysis; Avian influenza                                                                                                                                                                                                                                                                                                                                                                                                                                                                                                                                                                                                                                                                                                                                                                                                                                                                                                                                                                                                                                                                                                                                                                                                                                                                                                                                                                                                                                                                                                                                                                                                                                                                                                                                                                                                                                                                                                                                                                                                                                                                                                      |
| <b>Abstract:</b>              | <p>Event-Based Surveillance (EBS) tools, such as HealthMap and PADI-web, monitor online news reports and other unofficial sources, with the primary aim to provide timely information to users from health agencies on disease outbreaks occurring worldwide. In this work, we describe how outbreak-related information disseminates from a primary source, via a secondary source, to a definitive aggregator, an EBS tool, during the 2018/19 avian influenza season. We analysed 337 news items from the PADI-web and 115 news articles from HealthMap EBS tools reporting avian influenza outbreaks in birds worldwide between July 2018 and June 2019. We used the sources cited in the news to trace the path of each outbreak. We built a directed network with nodes representing the sources (characterised by type, specialisation, and geographical focus) and edges representing the flow of information. We calculated the degree as a centrality measure to determine the importance of the nodes in information dissemination. We analysed the role of the sources in early detection (detection of an event before its official notification) to the World Organisation for Animal Health (WOAH) and late detection.</p> <p>A total of 23% and 43% of the avian influenza outbreaks detected by the PADI-web and HealthMap, respectively, were shared on time before their notification. For both tools, national and local veterinary authorities were the primary sources of early detection. The early detection component mainly relied on the dissemination of nationally acknowledged events by online news and press agencies, bypassing international reporting to the WAOH. WAOH was the major secondary source for late detection, occupying a central position between national authorities and disseminator sources, such as online news. PADI-web and HealthMap were highly complementary in terms of detected sources, explaining why 90% of the events were detected by only one of the tools.</p> <p>We show that current EBS tools can provide timely outbreak-related information and priority news sources to improve digital disease surveillance.</p> |
| <b>Order of Authors:</b>      | Sarah Valentin<br>Bahdja Boudoua<br>Kara Sewalk<br>Nejat Arinik<br>Mathieu Roche<br>Renaud Lancelot<br>Elena Arsevska                                                                                                                                                                                                                                                                                                                                                                                                                                                                                                                                                                                                                                                                                                                                                                                                                                                                                                                                                                                                                                                                                                                                                                                                                                                                                                                                                                                                                                                                                                                                                                                                                                                                                                                                                                                                                                                                                                                                                                                                                                                                       |
| <b>Response to Reviewers:</b> | November 16, 2022<br>Subject: Response to the review of manuscript number PONE-D-22-24102<br>Dear PlosOne Chief Editor and Reviewers,<br>We acknowledge your comments on our manuscript "Dissemination of information in event-based surveillance, a case study of Avian Influenza". We addressed your constructive reviews by modifying                                                                                                                                                                                                                                                                                                                                                                                                                                                                                                                                                                                                                                                                                                                                                                                                                                                                                                                                                                                                                                                                                                                                                                                                                                                                                                                                                                                                                                                                                                                                                                                                                                                                                                                                                                                                                                                    |

our manuscript (using track changes) and answering the reviewers' questions here-below.  
Best regards,  
The authors  
General comments from the editor  
If applicable, we recommend that you deposit your laboratory protocols in protocols.io to enhance the reproducibility of your results. Protocols.io assigns your protocol its own identifier (DOI) so that it can be cited independently in the future. For instructions see: <https://journals.plos.org/plosone/s/submission-guidelines#loc-laboratory-protocols>.

1. Please ensure that your manuscript meets PLOS ONE's style requirements, including those for file naming. The PLOS ONE style templates can be found at :

- [https://journals.plos.org/plosone/s/file?id=wjVg/PLOOne\\_formatting\\_sample\\_main\\_body.pdf](https://journals.plos.org/plosone/s/file?id=wjVg/PLOOne_formatting_sample_main_body.pdf), and
- [https://journals.plos.org/plosone/s/file?id=ba62/PLOOne\\_formatting\\_sample\\_title\\_authors\\_affiliations.pdf](https://journals.plos.org/plosone/s/file?id=ba62/PLOOne_formatting_sample_title_authors_affiliations.pdf)

- Author affiliations formatting. We have added the appropriate pilcrow symbol for the equal contributors of the work. We have set the appropriate format for the corresponding author. We have fixed the affiliations, by removing postcodes and removing abbreviations of Departments and listing all institutions in full. Please check page 1 of the manuscript.

- Manuscript body formatting. We have adjusted level 1 heading for all major sections.

File formats for figures were corrected, now they are in .tiff format and passed via the PACE tool suggested by PlosOne.

2. We note that the grant information you provided in the 'Funding Information' and 'Financial Disclosure' sections do not match. When you resubmit, please ensure that you provide the correct grant numbers for the awards you received for your study in the 'Funding Information' section.

- Done. Funding from Acknowledgments section has been removed and moved into the 'Funding Information' and 'Financial Disclosure' sections. Please see the new Acknowledgments section in line 546.

3. Thank you for stating the following in the Acknowledgments Section of your manuscript: "This work has been funded by the "Monitoring outbreak events for disease surveillance in a data science context" (MOOD) project from the European Union's Horizon 2020 research and innovation program under grant agreement No. 874850 (<https://mood-h2020.eu/>) and is catalogued as MOOD 049." We note that you have provided funding information that is not currently declared in your Funding Statement. However, funding information should not appear in the Acknowledgments section or other areas of your manuscript. We will only publish funding information present in the Funding Statement section of the online submission form. Please remove any funding-related text from the manuscript and let us know how you would like to update your Funding Statement. Currently, your Funding Statement reads as follows: "The funders had no role in study design, data collection and analysis, decision to publish, or preparation of the

manuscript.” Please include your amended statements within your cover letter; we will change the online submission form on your behalf.

- Done. Funding from Acknowledgments section has been removed and moved into the ‘Funding Information’ and ‘Financial Disclosure’ sections.
- Please continue to use the current Funding Statement: “The funders had no role in study design, data collection and analysis, decision to publish, or preparation of the manuscript.”

4. In your Data Availability statement, you have not specified where the minimal data set underlying the results described in your manuscript can be found. PLOS defines a study’s minimal data set as the underlying data used to reach the conclusions drawn in the manuscript and any additional data required to replicate the reported study findings in their entirety. All PLOS journals require that the minimal data set be made fully available. For more information about our data policy, please see <http://journals.plos.org/plosone/s/data-availability>. Upon re-submitting your revised manuscript, please upload your study’s minimal underlying data set as either Supporting Information files or to a stable, public repository and include the relevant URLs, DOIs, or accession numbers within your revised cover letter. For a list of acceptable repositories, please see <http://journals.plos.org/plosone/s/data-availability#loc-recommended-repositories>. Any potentially identifying patient information must be fully anonymized.

- We created a Zenodo repository (<https://doi.org/10.5281/zenodo.7324144>) containing the entire dataset to reproduce the results. We provided the link in the manuscript, section Data reporting, line 549.
- We also shared the script for our results presented in the manuscript in a public GitHub repository (<https://github.com/SarahVal/EBS-network>). We provided the link in the manuscript, section Statistical reporting, line 552.

- Our dataset does not contain patient information.

Important: If there are ethical or legal restrictions to sharing your data publicly, please explain these restrictions in detail. Please see our guidelines for more information on what we consider unacceptable restrictions to publicly sharing data: <http://journals.plos.org/plosone/s/data-availability#locunacceptable-data-access-restrictions>. Note that it is not acceptable for the authors to be the sole named individuals responsible for ensuring data access. We will update your Data Availability statement to reflect the information you provide in your cover letter.

- There are no legal and ethical restrictions for sharing our dataset publicly. Please check the description of our dataset at: <https://doi.org/10.5281/zenodo.6908000>

5. Please upload a new copy of Figure 3 as the detail is not clear. Please follow the link for more information: <https://blogs.plos.org/plos/2019/06/looking-good-tips-for-creating-your-plos-figuresgraphics/>

- All figures have passed though the PACE web-based imaging review tool. We provide you with new figure publication graphics in a .tiff format, uploaded separately. For clarity, we have moved Figure 3 into Supp material.

Comments from reviewer 1

Line 35: Please write what WOAHA means.

- Done, we defined World Organisation for Animal Health (WOAH, founded as OIE), line 159. We

further checked for all other acronyms and their first mention full description.

Line 165: there's a N starting the sentence (also in lines 276 and 278 that are starting with numbers).

Please check

- Removed in line 165, it was a typing error. However, we did not find typos for numbers for lines 276 & 278.

Within the results section, what do authors mean by unique events in Table 1?

- A unique event, non-overlapping event, as initially defined in our manuscript, was an event detected by

either of the event-based surveillance (EBS) tools, PADI-web or HealthMap. More precisely, a unique

event was an event event detected by PADI-web (or by HealthMap, respectively) and not detected by

HealthMap (or by PADI-web, respectively). To avoid confusion, we replace the term "unique" by "nonoverlapping".

Non-overlapping events enable us to analyse the overlap (and, thus, the complementary)

between HealthMap and PADI-web. We provide an improved description of the term "unique event" in

the manuscript in the section Material and methods, section Event detection line 166 and in the Results,

section Event detection lines 266-271.

Figure 3 is impossible to read. Could the authors improve the image quality?

- All figures have passed through the PACE web-based imaging review tool. We provide you with new

figure publication graphics in a .tiff format, uploaded separately. For clarity, we have moved Figure 3

into Supp material.

Comments from reviewer 2

Introduction

First paragraph: The manuscript refers to communication in health surveillance and how it can be expanded

in the case of avian influenza. Which bibliographic reference of the world health organization that

guides or suggests the use of the dissemination of information on health-related events?

- We added references to the Epidemic Intelligence paradigm, which promotes the use of non-official

sources to follow the dissemination of information on health-related events and complement indicatorbased

surveillance. We have in detail reworked the introduction, please check pages 3 and 4. What context do these Padi-web and HealthMap applications work in? The first

paragraphs do not

mention health surveillance and its emergencies where these programs/applications can be useful.

- PADI-web and HealthMap facilitate the collection, analysis and dissemination of event-based surveillance

data on infectious diseases and associated health issues, in the context of epidemic intelligence.

Several studies have assessed their use and performances in different epidemiological contexts including

new and enzootic, epizootic and zoonotic infectious diseases. We provide example and new references in

the manuscript. We have in detail reworked the introduction, please check pages 3 and 4.

Second paragraph: it is not clear and explanatory all the advantages of using healthy maps descriptors. It

must be in simple and clear computational language, after all, the target audience is

not only the scientific community, but health workers. We specified the audience and simplified the description of both tools in the manuscript. We have in detail reworked the introduction, please check pages 3 and 4.

-Seventh paragraph, last line: What is your source of comparison in relation to the healthy map data?  
 what is the assumption or hypothesis that it can be more useful ?  
 - In the seventh paragraph, we refer to a former study that evaluated the role of the sources detected by HealthMap regarding the detection of outbreaks, at a national scale (Nepal). The gold standard database with which the authors compared HealthMap was the official country outbreak notifications. We motivate our study as an extension of this work, by providing two significant enhancements: (1) we enlarge this work on a global scale and (2) we do not solely rely on the sources directly detected by the EBS tools, but we trace back the origin of the outbreak information. We have in detail reworked the introduction, please check pages 3 and 4.

Regarding the questions of this work

1. What are the sources involved in the reporting of outbreak-related information on the web?- This would not be a question but a methodology to evaluate.  
 - Every EBS media monitoring tool in use today has its own methodology for detection of sources on the web, collection, filtering of news and extraction of relevant information from the unstructured text from the news. The sources detected by an EBS tool result from (1) the choice of targeting a specific source (e.g. HealthMap collect Pro-MED alerts) and (2) its methodological choices (e.g. keywords to capture the news, languages for the keywords, Google news regions to monitor, etc.). In the last case, the specific online news that will be captured cannot be know a priori. In our work, we do not solely evaluate the sources directly detected by the EBS tools, but, we also trace back and characterise the initial sources first emitting the disease outbreak information (referred to as primary sources in our manuscript) and the intermediate ones, based on the manual evaluation of all sources cited in each news, which was a fastidious work of data collection and curation for the co-authors. We provide a clarification on this objective in the introduction.

3. How complementary are the different EBS tools in terms of monitored sources and reported outbreakrelated information?—Is it compared to which data?  
 We address this question in two steps. First, we calculate the proportion of overlapping events (events that were detected by both PADI-web and HealthMap), We show that almost half of the detected events were non-overlapping events. Second, we show that the two tools do not monitor the same sources (i.e. PADI-web retrieved a largest number of online news sources, while HealthMap retrieved content from more social platforms than PADI-web). Please check, the Event detection section in Methods, lines 151-167 and in Results, lines 251-271.

Methodology  
 Event detection  
 First paragraph: We chose a one-year 131 study period (July 2018 - June 2019) to

capture the spacetime epidemiological characteristics of the AI outbreaks around the world.–¿ From which agencies?What sources?

The official data source is described further in our manuscript (Empres-i). Here, we meant that we wanted to embrace a time period enabling us to capture different epizootic events worldwide, to be able to compare the EBS tools and evaluate the network of sources based on a large number of AI outbreaks.

Please check lines 151-165.

- We provide a new sentence in the Methods section: "We chose a one-year study period (July 2018 - June 2019) to capture larger scale AI outbreak patterns around the world." Please check lines 128-135.

Define about Empres-i - How it collects health data from official sources?

- We provide a more clear description of the EMPRES-i database, its purpose and its sources. Please

check the Event detection of the Materials and methods section, lines 151-165.. Second paragraph line 145, define what this acronym WOAHA means. From this description you can mention only the acronym but not have defined yourself previously

- Done, we provide the full name of the World Organisation for Animal Health (WOAH, ex-OIE). Please check line 159.

Network construction

First paragraph "We assumed that an information pathway could be deduced from the sources cited in a news content. In an information pathway, the first node is called the primary source (i.e. the earliest emitter source), the last node is called the final source (i.e. the final aggregator, PADI-web or HealthMap) and the remaining nodes, if any, are called secondary sources." Comment: It is necessary to modify this definition because primary data in public health and epidemiology are those obtained directly in the territory to be sampled regarding a certain disease data. A secondary data are obtained through the country's information systems.

Epidemic intelligence (EI) encompasses all activities related to early identification of potential health hazards, their verification, assessment and investigation in order to recommend public health control measures.

EI integrates both an indicator-based and an event-based component. 'Indicator-based component' refers to structured data collected through routine surveillance systems, corresponding to the definitions provided by the reviewer. 'Event-based component', the context of our study, refers to unstructured data gathered from sources of intelligence of any nature (e.g. media, laboratory, channels of communications, etc., see <https://www.eurosurveillance.org/content/10.2807/esm.11.12.00665-en>). As noted by the reviewer, the primary sources in terms of diagnosis is usually a laboratory, even in EBS, especially when studying a well-known disease subject to notification as avian influenza. However, this is not true when the detected disease is not yet diagnosed and when solely information about unusual symptoms are communicated. This component of EBS, which is closed to the syndromic surveillance, is an essential component of early detection. In this study, we defined primary sources in EBS paradigm as the earliest

cited source of each path, which is not necessarily the primary source in terms of diagnosis, but rather in terms of communication. Thus, it can include official sources typically involved in IBS (laboratory, country's official authorities), as well as informal sources (a person, an company, etc.). We have reworked the introduction, please check pages 3 and 4.

No reference to the global surveillance system by a specific WHO program was cited or used (<https://www.who.int/initiatives/global-influenza-surveillance-and-response-system> and <https://www.who.int/health-topics/influenza-avian-and-other-zoonotic> ) Why? Our study lies in the context of event-based surveillance in the animal health domain. We did not described World Health Organization surveillance programs as they mainly focus on zoonotic events from a public health perspective, in the indicator-based paradigm. Besides, our objective was to describe the EBS systems.

Official sources on animal and human surveillance should not be test sources for the network as they are the gold standard for comparing sources of risk communication. In this study, official sources on animal and human surveillance are not tested by themselves. They appeared in the network because they were cited by non-official sources monitored by the EBS tools. For instance, if an online news sources stated "According to the WHOA, an outbreak of avian influenza was detected yesterday in country X", WHOA was the emitter (primary) source of our network.

Qualitative nodes analysis: Reformulate or change the terms referring to primary and secondary data that cannot refer to the EBS tools technique because they are intrinsically used terms. The terms used must be from epidemiology.

To our knowledge, this work is the first attempt to describe the dissemination of information between sources cited in online news in the context of health surveillance, and no specific terms were proposed to refer to such sources in the epidemiological context. Thus, we proposed the terms primary and secondary as they are explicit for the reader and reflect the temporal diffusion of the events.

How sensitive/specific is the PADI web and Health Map data compared to the gold standard of data?  
Where are the statistical analyzes showing this fact?  
-We calculated the sensitivity of HealthMap and PADI-web, following the definition provided in section Methods. The specificity of event-based surveillance tools cannot be calculated, as it is impossible to assess the status of non-official events they detect; there may be false positive events, as well as true positive events not reported to the gold standard databases (WOAH and EMPRES-i). We did not provide any further statistical tests as the purpose of our study is not to evaluate the influence of factors in the sensitivity of the tools. Please check the approach and the results in lines 168-181 and 276-278.

As for the geographic scope, it was not clear in the text to the national scope that the data refer. The data should cover the following variables: total number and frequencies of avian influenza events; mean, maximum and minimum value of the number of events monitored per epidemiological week; source and

means of event notification; frequency of events monitored by region of occurrence and spatial distribution of events according to reference municipality; opportunity to notification; Closing opportunity (time interval between the date from the notification to the National Surveillance until the end of its monitoring) classification of the group of events according to means of transmission and risk classification after evaluation of the events

For the data from EBS tools, we did not chose any national scope a priori: our data selection was solely based on the studied disease (avian influenza) and host (animals) worldwide. To clarify, we added a table summarizing the total number and frequencies of avian influenza events; mean, maximum and minimum value of the number of events monitored per week; and the source of the event notification as Supplementary material.

**Additional Information:**

| Question | Response |
|----------|----------|
|----------|----------|

|                                                                                                                                                                                                                                                                                                                                                                                                                                                                                                                                                                                                                                                                                                                                                                                                                                                                                                                                                                                                                                                                                                                                                                                                                                                                                                                                                                    |                                                                                                                                      |
|--------------------------------------------------------------------------------------------------------------------------------------------------------------------------------------------------------------------------------------------------------------------------------------------------------------------------------------------------------------------------------------------------------------------------------------------------------------------------------------------------------------------------------------------------------------------------------------------------------------------------------------------------------------------------------------------------------------------------------------------------------------------------------------------------------------------------------------------------------------------------------------------------------------------------------------------------------------------------------------------------------------------------------------------------------------------------------------------------------------------------------------------------------------------------------------------------------------------------------------------------------------------------------------------------------------------------------------------------------------------|--------------------------------------------------------------------------------------------------------------------------------------|
| <p><b>Financial Disclosure</b></p> <p>Enter a financial disclosure statement that describes the sources of funding for the work included in this submission. Review the <a href="#">submission guidelines</a> for detailed requirements. View published research articles from <a href="#">PLOS ONE</a> for specific examples.</p> <p>This statement is required for submission and <b>will appear in the published article</b> if the submission is accepted. Please make sure it is accurate.</p> <p><b>Unfunded studies</b><br/>Enter: <i>The author(s) received no specific funding for this work.</i></p> <p><b>Funded studies</b><br/>Enter a statement with the following details:</p> <ul style="list-style-type: none"> <li>• Initials of the authors who received each award</li> <li>• Grant numbers awarded to each author</li> <li>• The full name of each funder</li> <li>• URL of each funder website</li> <li>• Did the sponsors or funders play any role in the study design, data collection and analysis, decision to publish, or preparation of the manuscript?</li> <li>• <b>NO</b> - Include this sentence at the end of your statement: <i>The funders had no role in study design, data collection and analysis, decision to publish, or preparation of the manuscript.</i></li> <li>• <b>YES</b> - Specify the role(s) played.</li> </ul> | <p>The funders had no role in study design, data collection and analysis, decision to publish, or preparation of the manuscript.</p> |
|--------------------------------------------------------------------------------------------------------------------------------------------------------------------------------------------------------------------------------------------------------------------------------------------------------------------------------------------------------------------------------------------------------------------------------------------------------------------------------------------------------------------------------------------------------------------------------------------------------------------------------------------------------------------------------------------------------------------------------------------------------------------------------------------------------------------------------------------------------------------------------------------------------------------------------------------------------------------------------------------------------------------------------------------------------------------------------------------------------------------------------------------------------------------------------------------------------------------------------------------------------------------------------------------------------------------------------------------------------------------|--------------------------------------------------------------------------------------------------------------------------------------|



\* typeset

### Competing Interests

Use the instructions below to enter a competing interest statement for this submission. On behalf of all authors, disclose any [competing interests](#) that could be perceived to bias this work—acknowledging all financial support and any other relevant financial or non-financial competing interests.

This statement is **required** for submission and **will appear in the published article** if the submission is accepted. Please make sure it is accurate and that any funding sources listed in your Funding Information later in the submission form are also declared in your Financial Disclosure statement.

View published research articles from [PLOS ONE](#) for specific examples.

#### NO authors have competing interests

Enter: *The authors have declared that no competing interests exist.*

#### Authors with competing interests

Enter competing interest details beginning with this statement:

*I have read the journal's policy and the authors of this manuscript have the following competing interests: [insert competing interests here]*

\* typeset

### Ethics Statement

Enter an ethics statement for this submission. This statement is required if the study involved:

The authors have declared that no competing interests exist.

N/A

- Human participants
- Human specimens or tissue
- Vertebrate animals or cephalopods
- Vertebrate embryos or tissues
- Field research

Write "N/A" if the submission does not require an ethics statement.

General guidance is provided below.

Consult the [submission guidelines](#) for detailed instructions. **Make sure that all information entered here is included in the Methods section of the manuscript.**

**Format for specific study types**

**Human Subject Research (involving human participants and/or tissue)**

- Give the name of the institutional review board or ethics committee that approved the study
- Include the approval number and/or a statement indicating approval of this research
- Indicate the form of consent obtained (written/oral) or the reason that consent was not obtained (e.g. the data were analyzed anonymously)

**Animal Research (involving vertebrate animals, embryos or tissues)**

- Provide the name of the Institutional Animal Care and Use Committee (IACUC) or other relevant ethics board that reviewed the study protocol, and indicate whether they approved this research or granted a formal waiver of ethical approval
- Include an approval number if one was obtained
- If the study involved *non-human primates*, add *additional details* about animal welfare and steps taken to ameliorate suffering
- If anesthesia, euthanasia, or any kind of animal sacrifice is part of the study, include briefly which substances and/or methods were applied

**Field Research**

Include the following details if this study involves the collection of plant, animal, or other materials from a natural setting:

- Field permit number
- Name of the institution or relevant body that granted permission

**Data Availability**

Authors are required to make all data underlying the findings described fully available, without restriction, and from the time of publication. PLOS allows rare exceptions to address legal and ethical concerns. See the [PLOS Data Policy](#) and [FAQ](#) for detailed information.

Yes - all data are fully available without restriction

A Data Availability Statement describing where the data can be found is required at submission. Your answers to this question constitute the Data Availability Statement and **will be published in the article**, if accepted.

**Important:** Stating 'data available on request from the author' is not sufficient. If your data are only available upon request, select 'No' for the first question and explain your exceptional situation in the text box.

Do the authors confirm that all data underlying the findings described in their manuscript are fully available without restriction?

**Describe where the data may be found in full sentences. If you are copying our sample text, replace any instances of XXX with the appropriate details.**

- If the data are **held or will be held in a public repository**, include URLs, accession numbers or DOIs. If this information will only be available after acceptance, indicate this by ticking the box below. For example: *All XXX files are available from the XXX database (accession number(s) XXX, XXX).*
- If the data are all contained **within the manuscript and/or Supporting Information files**, enter the following: *All relevant data are within the manuscript and its Supporting Information files.*
- If neither of these applies but you are able to provide **details of access elsewhere**, with or without limitations, please do so. For example:

*Data cannot be shared publicly because of [XXX]. Data are available from the XXX Institutional Data Access / Ethics Committee (contact via XXX) for researchers who meet the criteria for access to confidential data.*

*The data underlying the results presented in the study are available from (include the name of the third party*

\*\*\*NOTE TO PA @ ACCEPT: Please confirm DAS with AU\*\*\*

Data used in this paper are available from the Zenodo database at doi (<https://doi.org/10.5281/zenodo.6908000>). The script for our results presented in the paper are available in a public GitHub repository (<https://github.com/SarahVal/EBS-network>).

|                                                                                                                                                                                                                                         |                                                                                                                                                                                  |
|-----------------------------------------------------------------------------------------------------------------------------------------------------------------------------------------------------------------------------------------|----------------------------------------------------------------------------------------------------------------------------------------------------------------------------------|
| <p><i>and contact information or URL).</i></p> <ul style="list-style-type: none"><li>• This text is appropriate if the data are owned by a third party and authors do not have permission to share the data.</li></ul> <p>* typeset</p> |                                                                                                                                                                                  |
| Additional data availability information:                                                                                                                                                                                               | Tick here if the URLs/accession numbers/DOIs will be available only after acceptance of the manuscript for publication so that we can ensure their inclusion before publication. |

1                   Dissemination of information in event-based  
2                   surveillance, a case study of Avian Influenza

3

4 Sarah Valentin<sup>1,2,3,4¶</sup>, Bahdja Boudoua<sup>1,2¶</sup>, Kara Sewalk<sup>5</sup>, Nejat Arinik<sup>2</sup>, Mathieu Roche<sup>1,2,3</sup>,  
5 Renaud Lancelot<sup>1,3</sup>, Elena Arsevska<sup>1,3\*</sup>

6 <sup>1</sup> Joint Research Unit Animal, Health, Territories, Risks, Ecosystems (UMR ASTRE), French  
7 Agricultural Research Centre for International Development (CIRAD), National Research  
8 Institute for Agriculture, Food and Environment (INRAE), Montpellier, France

9 <sup>2</sup> Joint Research Unit Land, Environment, Remote Sensing and Spatial Information (UMR  
10 TETIS), Université de Montpellier, AgroParisTech, French Agricultural Research Centre for  
11 International Development (CIRAD), French National Centre for Scientific Research (CNRS),  
12 National Research Institute for Agriculture, Food and Environment (INRAE), Montpellier,  
13 France

14 <sup>3</sup> French Agricultural Research Centre for International Development (CIRAD), Montpellier,  
15 France

16 <sup>4</sup> Département de biologie, Université de Sherbrooke, Sherbrooke, Canada

17 <sup>5</sup> Computational Epidemiology Group, Boston Children's Hospital, Boston, United States

18 ¶ These authors contributed equally to this work

19 \*Corresponding author  
20 E-mail: elena.arsevska@cirad.fr (EA)

21

22 **ORCID affiliations**

23 Sarah Valentin <https://orcid.org/0000-0002-9028-681X>

24 Bahdja Boudoua <https://orcid.org/0000-0001-6174-3252>

25 Kara Sewalk <https://orcid.org/0000-0002-2917-0869>

26 Nejat Arinik <https://orcid.org/0000-0001-5080-4320>

27 Mathieu Roche <https://orcid.org/0000-0003-3272-8568>

28 Renaud Lancelot <https://orcid.org/0000-0002-5826-5242>

29 Elena Arsevska <https://orcid.org/0000-0002-6693-2316>

## 30 **Abstract**

31 Event-Based Surveillance (EBS) tools, such as HealthMap and PADI-web, monitor online news  
32 reports and other unofficial sources, with the primary aim to provide timely information to  
33 users from health agencies on disease outbreaks occurring worldwide.

34 In this work, we describe how outbreak-related information disseminates from a primary  
35 source, via a secondary source, to a definitive aggregator, an EBS tool, during the 2018/19  
36 avian influenza season. We analysed 337 news items from the PADI-web and 115 news articles  
37 from HealthMap EBS tools reporting avian influenza outbreaks in birds worldwide between  
38 July 2018 and June 2019. We used the sources cited in the news to trace the path of each  
39 outbreak. We built a directed network with nodes representing the sources (characterised by  
40 type, specialisation, and geographical focus) and edges representing the flow of information.  
41 We calculated the degree as a centrality measure to determine the importance of the nodes  
42 in information dissemination. We analysed the role of the sources in early detection  
43 (detection of an event before its official notification) to the World Organisation for Animal  
44 Health (WOAH) and late detection.

45 A total of 23% and 43% of the avian influenza outbreaks detected by the PADI-web and  
46 HealthMap, respectively, were shared on time before their notification. For both tools,  
47 national and local veterinary authorities were the primary sources of early detection. The early  
48 detection component mainly relied on the dissemination of nationally acknowledged events  
49 by online news and press agencies, bypassing international reporting to the WAOH. WAOH  
50 was the major secondary source for late detection, occupying a central position between  
51 national authorities and disseminator sources, such as online news. PADI-web and HealthMap  
52 were highly complementary in terms of detected sources, explaining why 90% of the events  
53 were detected by only one of the tools.

54 We show that current EBS tools can provide timely outbreak-related information and priority  
55 news sources to improve digital disease surveillance.

56 Keywords: event-based surveillance, digital disease detection, network analysis, avian  
57 influenza

58

## 59 **Introduction**

60 Recent developments in internet and digital technologies have contributed to the  
61 establishment of the Epidemic Intelligence (EI) framework, aiming at the early identification  
62 of potential health threats from sources of intelligence of any nature, their verification, and  
63 assessment for timely prevention and control by public and animal health (PH/AH) agencies.  
64 Event-based surveillance (EBS), as part of the EI, gathers unstructured data on potential and  
65 non-verified disease outbreaks mainly by monitoring the web, such as online media, social  
66 networks, and blogs. The EBS is complementary to traditional, indicator-based surveillance  
67 (IBS), also part of the EI, which collects structured data on verified disease outbreaks through  
68 routine national surveillance systems (1–3).

69 Since the early 2000s, several automatised EBS tools with open-access have been created,  
70 such as HealthMap, operating since 2006 and monitoring web sources for the public, animal,  
71 and plant health threats (4), and PADI-web, operating since 2016 and monitoring web sources  
72 for mainly animal health threats (5). The two open-access tools are used for the detection and  
73 monitoring of potential outbreaks reported in non-official sources on the web, including  
74 known diseases, such as avian influenza or Ebola (6,7), or clinical signs of unknown origin, such  
75 as acute respiratory syndrome (8). The main users of the two tools are EI staff at national and  
76 supranational PH/AH agencies and organizations, among others such as the French Platform  
77 for epidemiological surveillance in animal health (Platform ESA) (7) and the European Centre  
78 for Disease Control (ECDC) (9).

79 Both HealthMap and PADI-web implement algorithms to capture news on potential disease  
80 outbreaks from a broad range of data sources on the web in multiple languages and  
81 geographical regions (4,5). For example, HealthMap gathers data from Baidu, SoSo, Google  
82 News aggregators, and ProMED-mail in nine languages. PADI-web collects data from the  
83 Google News aggregator in 16 languages. Both tools further implement classification and  
84 information extraction algorithms to filter and extract the relevant outbreak information in a  
85 structured format from the free text, such as the place, date, and host of a described outbreak.  
86 Finally, HealthMap provides users with a world map interface to visualise the reports and  
87 information sources that report outbreaks. PADI-web provides users with a list of information  
88 sources and news content that reports outbreaks.

89 Previous evaluations of the EBS tools in use today, including HealthMap and PADI-web,  
90 focused mainly on the assessment of their extrinsic performance, such as timeliness, positive  
91 predictive value, or sensitivity (Se) in detecting outbreaks from the sources they monitor,



92 compared to official disease outbreaks (6,7). From an end-user perspective, Barboza et al.  
93 (10,11) assessed metrics such as the usefulness, simplicity, and flexibility of an EBS tool.

94 The understanding of the role of the inputs (i.e. the monitored sources) on the performance  
95 of EBS tools is less explored. Barboza et al., 2014 (10) found that the type of moderation,  
96 sources, languages, regions of occurrence, and types of cases influence EBS tool performance.  
97 Schwind et al. (2017) (12) identified that domestic and national news sources were more likely  
98 to report outbreaks than international news portals.

99 This study aimed to fill the existing gap in the role of sources monitored by EBS tools. We  
100 consider EBS tools as aggregators which collect disease outbreak information at the end of a  
101 transmission chain, referred to as a network. More precisely, we aimed to characterise the  
102 sources of outbreak information detected by an EBS tool and assess how the sanitary  
103 information circulates through the monitored sources before being detected by an EBS tool.

104 We assessed the flow of outbreak information from primary sources, providers of the  
105 information, until the end sources, EBS tools, and final aggregators of the information. We  
106 represent this information flow through a network structure. Moreover, we provide an in-  
107 depth analysis of the extracted networks and the characteristics of the sources involved in  
108 outbreak reporting using two EBS tools, HealthMap and PADI-web. In this study, we address  
109 three main questions:

- 110 1. What are the sources involved in the reporting of outbreak-related information on  
111 the web?
- 112 2. What are the roles of the different sources regarding the dissemination of outbreak-  
113 related information on the web, and what are their characteristics in terms of type,  
114 specialisation, and geographical scope?
- 115 3. How complementary are the different EBS tools in terms of monitored sources and  
116 reported outbreak-related information?

117 In this study, we further propose a new representation of the sources and their networks  
118 involved in digital disease surveillance to improve the detection and analysis of signals of  
119 disease emergence from online media. This representation and associated analysis address  
120 these questions.

121 The remainder of this paper is organised as follows. First, we summarise the objectives and  
122 methods of assessing information dissemination across data (news) sources. Next, we detail  
123 our methodology to collect and assess the dissemination of outbreak-related information via

124 PADI-web and HealthMap. We present and discuss our results in Section 3, before  
125 summarising the main conclusions of our work.

## 126 **Materials and methods**

### 127 **Data collection**

128 To conduct this study, we chose to analyse news reports of Avian Influenza (AI) detected by  
129 two EBS tools, PADI-web and HealthMap. AI viruses can spread over long distances via trade  
130 in poultry and wild-caught birds, as well as via the movement of wild birds (13). AI outbreaks  
131 are responsible for significant economic losses resulting from trade restrictions, loss of  
132 disease-free status for affected countries, or culling measures in infected flocks. Moreover, AI  
133 has great zoonotic potential, as some subtypes can infect different avian and mammalian  
134 animal hosts, including humans (14). Thus, early detection of AI outbreaks is essential for  
135 implementing protection and control measures and helping contain their spread.

136 For our study, we extracted all English news reports from PADI-web and HealthMap EBS tools,  
137 which described one or several AI outbreaks and were published between 1 July 2018 and 30  
138 June 2019 (i.e. 337 news reports from PADI-web and 115 news reports from HealthMap). We  
139 chose a one-year study period (July 2018 to June 2019) to capture the spatiotemporal  
140 epidemiological characteristics of AI outbreaks worldwide. The detection of the virus at a  
141 specific date and time is hereafter referred to as an event (most events are outbreaks, but  
142 some describe the detection of the virus in the environment). Two epidemiologists (BB, SV,  
143 authors of this work) manually assessed the relevance of each news item (a report was  
144 considered relevant if it contained at least one event) and discarded irrelevant news.  
145 Importantly, the events can be either reported as confirmed or suspected, as one of the  
146 keystones of EI is the detection of potential outbreaks before official confirmation. 

### 147 **Event detection**

148 Two epidemiologists (BB and SV, authors of this work) read the relevant news and identified  
149 all reported events. Each event described in the detected news was classified as official or  
150 non-official.

151 Official events corresponded to outbreaks officially notified by AH authorities. For this  
152 purpose, we used the Emergency Prevention System for Priority Animal and Plant Pests and  
153 Diseases (EMPRES-i), a global animal health information system (15,16) developed by the  
154 Food and Agriculture Organization (FAO) of the United Nations. EMPRES-i allows free access

155 to and sharing of disease outbreak data to support data analysis and notification to national  
156 AH authorities by monitoring and summarising the global status of priority animal diseases  
157 and zoonoses, including AI. One of the main sources of information for the EMPRES-i is the  
158 verified disease outbreak data provided by national AH authorities, mainly through traditional  
159 disease surveillance by the World Organisation for Animal Health (WOAH). The EMPRES-i has  
160 tracked AI outbreaks since 2003.

161 When an event could not be linked to an official event from the EMPRES-i, we labelled it as  
162 non-official and recorded the epidemiological information provided in the report (i.e. subtype,  
163 reported date of the event, the country and location of the event, the host affected, and the  
164 number of cases). This enabled us to identify when the same non-official event was reported  
165 in different news articles.

We evaluated the Se?  
What is this? There is no  
no acronym that  
explains it

166 For both official and non-official events, we calculated the number of non-overlapping events  
167 between the two EBS tools, that is, the events that were detected by one tool out of two.

168 For the official events, we evaluated the Se and timeliness of each tool. Timeliness is the lag  
169 in days between the date of official notification to the WOAH (day 0), as recorded in the  
170 EMPRES-i database, and the date when the same event was first detected by the PADI-web  
171 and HealthMap. A negative lag means that the EBS tool detects an event in a timely manner,  
172 that is, before the date of notification. A positive lag indicated that the EBS tool was untimely  
173 for detecting an outbreak, that is, the same day or after the official notification date. Se is  
174 defined as the ability of the EBS tool to report an event present in the EMPRES-i database,  
175 corresponding to the proportion of true positive events (TP) among the sum of true positive  
176 and false-negative (FN) events ( $Se = TP / (TP + FN)$ ). A TP event was defined as all AI outbreaks in  
177 the EMPRES-i database during the study period. An FN event was defined as an event present  
178 in the EMPRES-i database that was not detected by an EBS tool. The specificity of event-based  
179 surveillance tools cannot be calculated, as it is impossible to assess the status of non-official  
180 events detected (11); there may be false positive events as well as TP events not reported to  
181 the gold standard databases (WOAH and EMPRES-i).

## 182 **Network construction**

183  
184 To trace back the primary sources, we manually traced the information pathways of all events  
185 mentioned in the PADI-web and HealthMap news. We assumed that an information pathway  
186 could be deduced from the sources cited in the news content. In the information pathway,  
187 the first node is called the primary source (i.e. the earliest emitter source), the last node is

188 called the final source (i.e. the final aggregator, PADI-web, or HealthMap), and the remaining  
189 nodes, if any, are called secondary sources. The combination of all information pathways from  
190 news events gives a network structure, referred to as a network of information pathways.

191 Let  $G = (V, E, A)$  be a directed unweighted attributed graph representing a network of  
192 information pathways, where  $V$ ,  $E$ , and  $A$  are the set of network nodes, network edges, and  
193 attributes associated with the nodes, respectively (17). The network nodes represent the  
194 sources and final aggregators (PADI-web and HealthMap). Each node has three attributes, as  
195 defined in S1 Table: type (e.g. online news source, national veterinary authority, etc.),  
196 geographical focus (local, national, or international), and specialisation in animal health news  
197 coverage (general or specialised). The edges represent the dissemination of event information  
198 between two nodes (an emitter source,  $S_E$  that sends the event, and a receptor source,  $S_R$  that  
199 receives the event). The graph is directed as the information is transmitted from the  $S_E$  to the  
200  $S_R$ . A directed graph is formally defined as a graph  $G$  for which each edge in  $E$  has an ordering  
201 to its vertices (i.e. such that  $e_1 = (u, v)$  is distinct from  $e_2 = (v, u)$ , for  $e_1, e_2 \in E$ ). In our approach,  
202 the edges are not weighed because we create an edge between an  $S_E$  and  $S_R$  if  $S_R$  cites  $S_E$  at  
203 least once.

204 It is worth noting that an event can be transmitted through several paths and that a path can  
205 transmit several events. The first case occurs when the same event is reported by different  
206 sources (e.g. two online news articles). The second occurs when a single news article reports  
207 several events. Based on this fact, we separated the global graph into three subgraphs  
208 depending on the type of events detected and their timeliness: a graph containing the paths  
209 associated with the early detection of official events (timeliness  $< 0$ ), a graph containing the  
210 paths associated with the late detection of official events (timeliness  $\geq 0$ ), and a graph  
211 containing the paths associated with the detection of non-official events.

## 212 **Network analysis**

### 213 **Network description**

214 We first describe the network of information pathways extracted from the PADI-web and  
215 HealthMap news, PADI-web, and HealthMap networks hereafter, in terms of the number of  
216 edges, nodes, and paths. We visualised the networks using a chord diagram and classified the  
217 nodes according to their source types.

### 218 **Path analysis**

219 To evaluate the network performance regarding the dissemination of health events, we  
220 calculated the path length and reactivity of the networks. The path length is the number of

221 edges in the path. The path length corresponds to the number of secondary sources between  
222 the primary and final aggregators (PADI-web or HealthMap); for example, a path composed  
223 of three edges contain two secondary sources. We hypothesised that the fewer the number  
224 of sources in a path, the faster the transmission of information.

225 Path reactivity is the sum of the time lags between all the nodes composing the path. Path  
226 reactivity measures the number of days between the primary source's communication and  
227 detection by the final aggregator. Path reactivity is highly relevant for EI because it reflects  
228 the ability of the system to quickly disseminate events to the aggregator.

## 229 **Node analysis**

230 We assessed the importance of the nodes, i.e., the sources, in the PADI-web and HealthMap  
231 networks using qualitative and quantitative attributes.

232 We first evaluated the global ability of the sources to receive and transmit event information  
233 by merging PADI-web and HealthMap networks. We calculated the in-degree, out-degree, and  
234 all-degree centrality measures of nodes (18) and analysed their distribution according to the  
235 type of source. In-degree is the number of incoming edges to a node; thus, sources with a high  
236 in-degree collect information from a large range of other sources. Out-degree is the number  
237 of outgoing edges from a node. Sources with a high out-degree are often cited; thus, they  
238 can communicate outbreak-related information with high visibility. The all-degree is the sum  
239 of the in-degree and out-degree. Sources with a high all-degree, also referred to as “hubs”,  
240 combine the capacity to receive and share outbreak-related information (19).

241 We further analysed the role of the sources in the different subgraphs (early, late, and non-  
242 official), separating the PADI web and HealthMap networks. We classified the sources  
243 according to their location in the network (primary versus secondary) and calculated the  
244 frequency of each type of source (e.g. online news). We further calculated the proportion of  
245 primary and secondary sources according to their geographical focus and specialisation.

## 246 **Software**

247 The database was constructed using MS Office Access (version 2019). The analysis was  
248 performed using the *igraph* package available in R version 3.6 (20).

## 249 **Results**

### 250 **Event detection**

251 Between 1 July 2018 and 30 June 2019 national animal health authorities reported 351 AI  
252 outbreaks in the WOA. Among these, 81% (284/351) were from domestic birds, 10%

253 (34/351) were from wild birds, 6% (24/351) were from environmental samples, and 3%  
 254 (12/351) were unspecified.

255 The PADI-web detected 408 unique AI outbreak-related news reports, 337 (83%) of which  
 256 were considered relevant after manual curation (see details in S2 Table). HealthMap detected  
 257 163 unique AI outbreak-related news reports, 115 (71%) of which were relevant after manual  
 258 curation. Among the relevant reports, 37 were detected using both the EBS systems.

259 Both the PADI-web and HealthMap had a median of one event per news report (min=1,  
 260 max=14). In the PADI-web relevant news reports, 230 events were described, including 193  
 261 events that were not detected by HealthMap (Table 1). Among the detected events, 87%  
 262 (199/230) were official events; that is, they matched a notified AI outbreak to the WOA. The  
 263 remaining 31 events (13%) were unofficial, that is, they could not be verified. The majority  
 264 (82%) of PADI-web events described AI outbreaks in domestic birds (185/226), while AI  
 265 outbreaks in wild birds represented 13% (29/226) of the events.

266 HealthMap relevant reports described 68 events, among which 31 did not overlap with PADI-  
 267 web detected events (Table 1). Among these events, 88% (60/68) were official and 12% (8/68)  
 268 were non-official. Similar to the PADI-web, 78% (53/68) of the HealthMap events were in  
 269 domestic birds, whereas 16% (11/68) were in wild birds.

270 The non-overlapping events represented 45% (222/489) of all events detected by PADI-web  
 271 and HealthMap.

272 **Table 1. Number of official and non-official events of AI detected by PADI-web and**  
 273 **HealthMap between July 2018 and June 2019.** The number of non-overlapping events is  
 274 shown between parentheses.

| Type of host   | PADI-web  |              | HealthMap |              |
|----------------|-----------|--------------|-----------|--------------|
|                | Official  | Non-official | Official  | Non-official |
| Domestic birds | 174 (147) | 15 (13)      | 48 (23)   | 5 (3)        |
| Wild birds     | 16 (10)   | 13 (12)      | 9 (3)     | 2 (1)        |
| Mammals        | -         | 2 (1)        | -         | 1 (0)        |
| Environmental  | 8 (8)     | -            | 2 (0)     | -            |
| Unspecified    | 1 (1)     | 1 (1)        | 1 (1)     | -            |
| Total          | 199 (166) | 31 (27)      | 60 (27)   | 8 (4)        |

275

276 The Se of HealthMap and PADI-web were 17% (60/351) and 57% (199/351), respectively. The  
 277 number of events reported to the WOA and the events detected by the two EBS tools per  
 278 week and region are provided in the S3 Table.

279 The timeliness of PADI-web varied from 112 days before to 39 days after notification of an  
 280 outbreak to the WOH; 24% (47/199) of the events detected by PADI-web were detected  
 281 before their official notification, representing 13% of the official events (Fig 1). The PADI-web  
 282 was timelier in detecting AI events in wild birds than in domestic birds. More precisely, 21%  
 283 (36/174) of the AI outbreaks in domestic birds in the PADI-web were detected before their  
 284 official notification, while 56% of the events (9/16) were detected early in wild birds, with a  
 285 maximum of 112 days before official notification in wild birds.

286 The timeliness of HealthMap varied from 46 days before to 66 days after an official reporting  
 287 of an event to the WOH; 43% (26/60) of the events detected by the tool were reported  
 288 before the official notification, representing 7% of the official events (Fig 1). In the HealthMap  
 289 network, 42% (20/48) and 56% (5/9) of AI outbreaks in domestic and wild birds, respectively,  
 290 were detected before their official notification, with a maximum of 43 days before official  
 291 notification in wild birds.

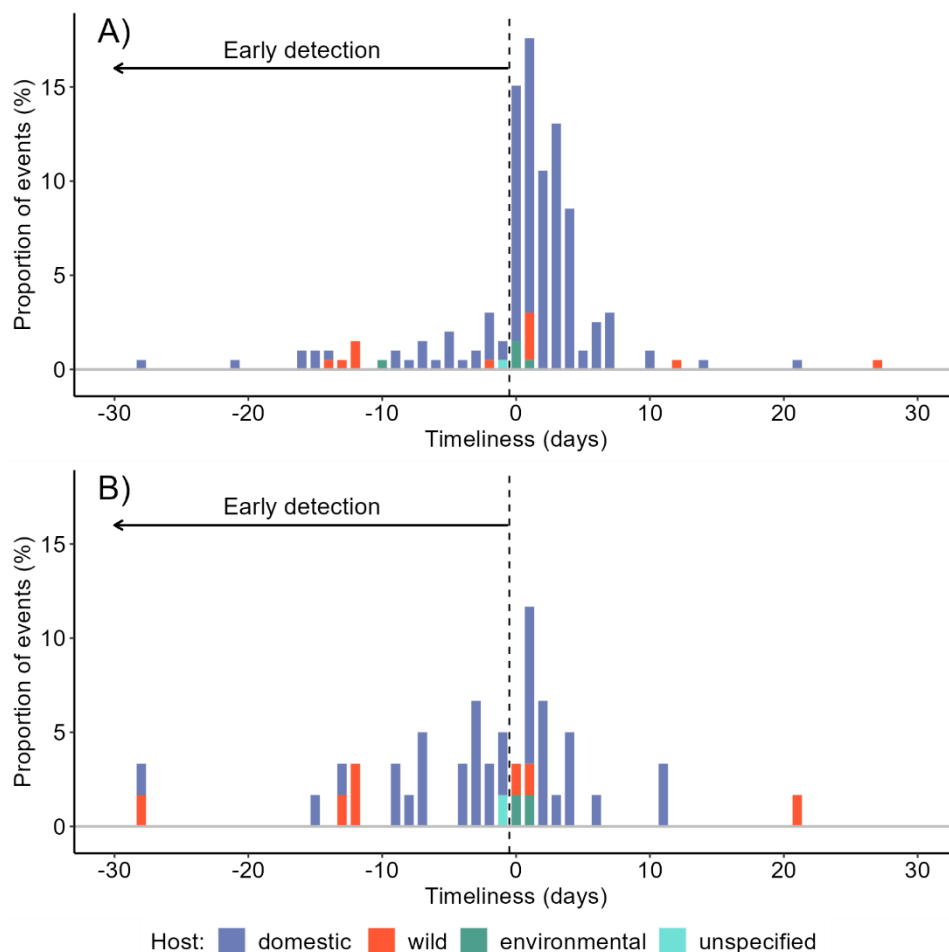

292

293 **Fig 1. Timeliness in the detection of AI outbreaks according to the type of host for A) PADI-**  
 294 **web and B) HealthMap.** For visibility, extreme values i.e., less than 30 days and higher than  
 295 30 days are not shown.

## 296 **Network analysis**

### 297 **Network description**

298 1During the study period, the PADI-web network disseminated AI outbreak-related  
299 information from 250 different nodes (sources), 446 unique edges (links), and 455 paths. The  
300 2HealthMap network comprised 108 nodes, 150 unique edges, and 107 paths. A graphical  
301 representation of both networks, as well as details of the edges and nodes, are provided in  
302 S4-7 Tables and S1 Fig.

303 **Table 2. Types of sources (i.e., nodes) in PADI-web and HealthMap networks disseminating**  
304 **outbreak-related news on Avian influenza between 1 July 2018 and 30 June 2019**  
305

| Type of source                     | PADI-web      | HealthMap     |
|------------------------------------|---------------|---------------|
| online news source                 | 47.6% (n=119) | 36.1% (n=39)  |
| national vet authority             | 14% (n=35)    | 20.4 % (n=22) |
| local veterinary authority         | 13.2% (n=33)  | 8.3 % (n=9)   |
| local official authority           | 6% (n=15)     | 3.7% (n=4)    |
| press agency                       | 4.8% (n=12)   | 10.2% (n=11)  |
| radio, TV                          | 4.4% (n=11)   | 3.7% (n=4)    |
| laboratory                         | 2.4% (n=6)    | 2.8% (n=3)    |
| national official authority        | 2% (n=5)      | 5.6% (n=6)    |
| research organisation              | 1.6% (n=4)    | 1.9% (n=2)    |
| local person                       | 1.2% (n=3)    | 0             |
| social platform                    | 1.2% (n=3)    | 4.6% (n=5)    |
| private company                    | 0.8% (n=2)    | 0             |
| EBS tool                           | 0.4% (n=1)    | 1.9% (n=2)    |
| international veterinary authority | 0.4% (n=1)    | 0.9% (n=1)    |
| Total                              | 250           | 108           |

306

307 Online news was the most represented source (47.6% of the sources in the PADI-web network  
308 and 36% in the HealthMap network (Table 2). Local veterinary authorities were more frequent  
309 in the PADI web network than in the HealthMap network. Conversely, press agencies  
310 represented 10.2% of the HealthMap network sources, compared to 4.8% in the PADI-web  
311 network.

### 312 **Path analysis**

313 Most of the PADI-web paths are composed of two (232/455; 51%) and three (182/455; 40%)  
314 edges, 4% (18/455) of the paths are composed of a single edge (they do not cite any source),  
315 and 5% (21/455) of the paths are made up of four edges and more. Similarly, most HealthMap  
316 paths are composed of two (53/107; 50%) and three (32/107; 30%) edges, 14% (15/107) of  
317 the paths are composed of one edge and 5% (7/107) are composed of five edges.



318 In the PADI-web, 83% (376/455) of the paths propagated events in one day (n=41) or less than  
319 one day (n=335). Similar results were observed in HealthMap, with 94% (87/107) of the paths  
320 propagating events in one day (n=3) or less than one day (n=84).

### 321 **Quantitative node analysis**

322 Only 24% (69/287) of the sources in the global network of the PADI-web and HealthMap were  
323 characterised by an in-degree greater than 1, indicating that most of the sources received  
324 information from a single source. The EBS tools, PADI-web and HealthMap, international  
325 veterinary authority, social platforms, press agencies, and research organisations had the  
326 highest median in-degrees (Fig 2).

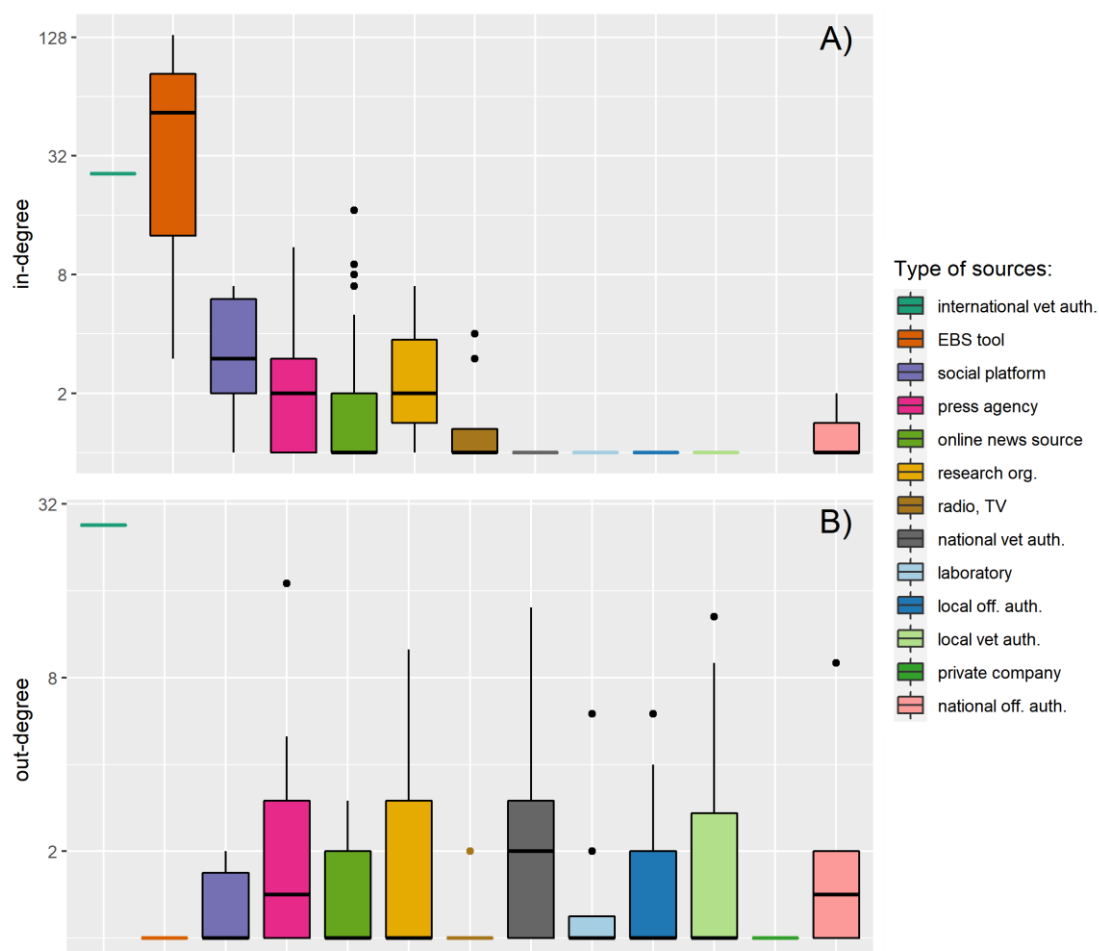

327

328 **Fig 2. Performance of sources in terms of A) in-degree and B) out-degree, aggregated by**

329 **type.** The y-axis has been log-scaled. Distributions of in-degree and out-degree are

330 represented with box plots based on a 95% confidence interval (outliers are represented

331 with dots).

332 These groups contain sources which have access to a large amount of information, that is,

333 different sources. The EBS tools had the highest median in-degree because they included

334 PADI-web and HealthMap, the two aggregators in our study. Except for these two EBS tools,  
 335 the WOAHA stood out with a maximal in-degree equal to 26. Online news sources were  
 336 characterised by a median in-degree of one, but twelve outliers had an in-degree higher than  
 337 5, among which “Times of India”, and two sources specialised in poultry production,  
 338 “PoultrySite” and “WATTAgNet” (Table 2). Similarly, the social platforms, press agencies, and  
 339 research organisations were characterised by a high intra-group variance, containing highly  
 340 connected sources (e.g. Reuters, Xinhua).

341 The median out-degree of nine out of the 13 types of sources was one, explained by the fact  
 342 that 64% (183/297) of the sources in the networks were cited only once. Local and national  
 343 veterinary authorities had higher out-degree values than in-degree values, highlighting their  
 344 role as sources of information. Individually, the WOAHA stands out with the maximal out-  
 345 degree (27), followed by Reuters, one national authority, and one local veterinary authority  
 346 (Table 2). As for in-degree, the out-degree variance was high in most groups, owing to the  
 347 presence of outliers being significantly better transmitters than the other sources of their  
 348 group.

349 WOAHA was the best-performing source in terms of all degrees, confirming its central position.  
 350 It was followed by two press agencies, Reuters and Xinhua, the veterinary authority of  
 351 Bulgaria, and Indian online news, Time of India (Table 2).

352 **Table 2. Top-5 sources in terms of in-degree, out-degree and all-degree.** The EBS tools  
 353 PADI-web and HealthMap were excluded as they were chosen as the aggregators in our  
 354 study.

|                   | Source                                              | Value | Type                    |
|-------------------|-----------------------------------------------------|-------|-------------------------|
| <b>In-degree</b>  | WOAHA                                               | 25    | International vet auth. |
|                   | Times of India                                      | 17    | Online news             |
|                   | Xinhua                                              | 11    | Press agency            |
|                   | The Poultry Site                                    | 9     | Online news             |
|                   | WATTAgNet                                           | 8     | Online news             |
| <b>Out-degree</b> | WOAHA                                               | 26    | International vet auth. |
|                   | Reuters                                             | 17    | Press agency            |
|                   | Bulgaria Vet Auth                                   | 14    | National vet auth.      |
|                   | Minnesota Vet Authorities                           | 13    | Local vet auth.         |
|                   | USA National Oceanic and Atmospheric Administration | 10    | Research org.           |
| <b>All-degree</b> | WOAHA                                               | 51    | International vet auth. |
|                   | Reuters                                             | 24    | Press agency            |
|                   | Times of India                                      | 20    | Online news             |
|                   | Bulgaria Vet Auth                                   | 15    | National vet auth.      |
|                   | Xinhua                                              | 14    | Press agency            |

355

356 **Qualitative nodes analysis**

357 National veterinary authorities were the most frequent primary source of events in the late  
358 detection of events in both HealthMap and PADI-web (69% and 63% of the primary sources,  
359 respectively) and the early detection of HealthMap events (42% of the secondary sources)  
360 (Figs 3 and 4; detailed numbers in S8-9 Tables). Local veterinary authorities were the most  
361 frequent primary source involved in the early detection of events by the PADI-web (44% of  
362 the primary sources) and the second most frequent in HealthMap. The transmission of events  
363 in the late detection context was mainly driven by WOA, press agencies, and online news for  
364 both the EBS tools. The transmission of events in the early detection context was mainly driven  
365 by online news sources (69% and 58% of the secondary sources in PADI-web and HealthMap,  
366 respectively), and press agencies were less frequent than in the early detection networks.

367 Social platforms represented 13% of the secondary sources involved in the early detection by  
368 HealthMap, whereas this type of source was barely used by the PADI-web.

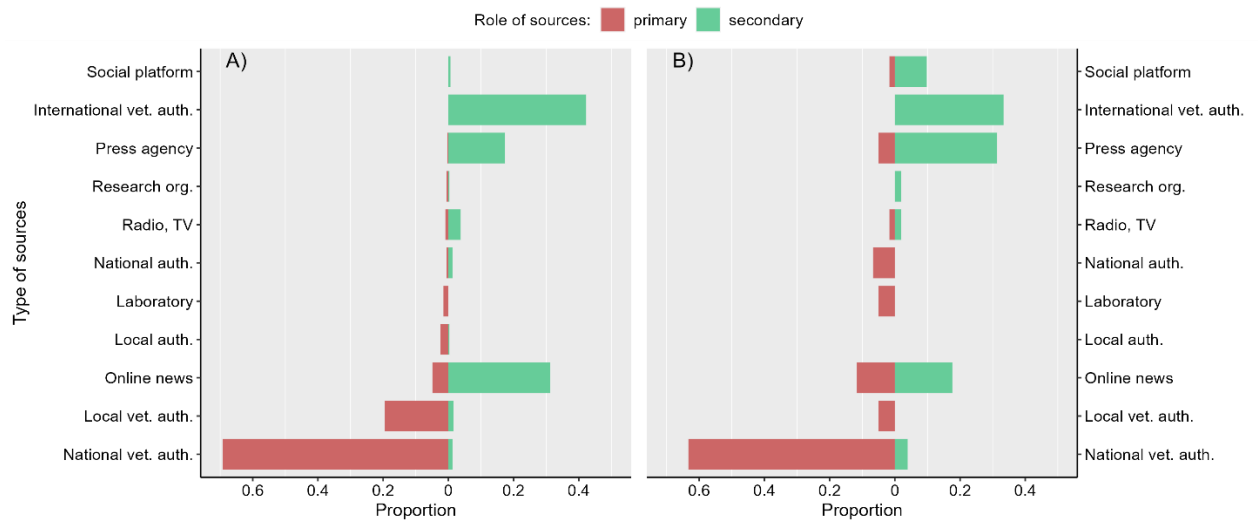

370

371 **Fig 3. Proportion of the types of primary and secondary sources according to their role in**  
 372 **the (a) PADI-web and (b) HealthMap late detection networks.** Primary sources are sources  
 373 that are the first to emit an event, secondary sources are sources which receive and emit an  
 374 event to another source.  
 375

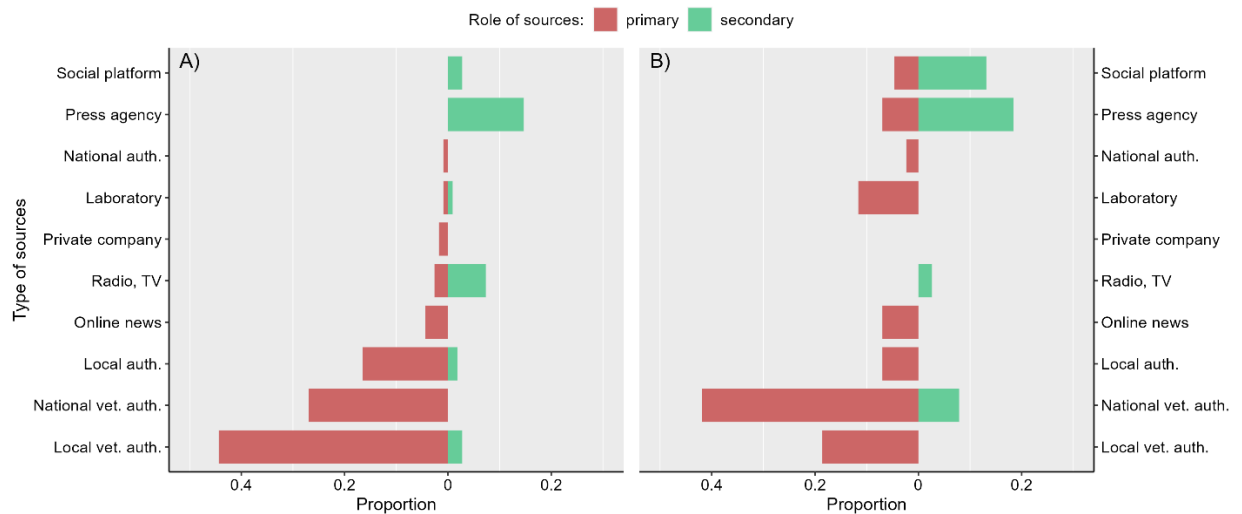

376  
 377

378 **Fig 4. Proportion of the types of primary and secondary sources according to their role in**  
 379 **the (a) PADI-web and (b) HealthMap early detection network.** Primary sources are sources  
 380 that are the first to emit an event, secondary sources are sources which receive and emit an  
 381 event to another source

382 Nearly 75% of the primary sources in the early detection network of the PADI-web had a local  
 383 geographical scope, in contrast to 26% in HealthMap (Fig 5). This result was consistent with  
 384 our previous results, highlighting the role of local sources in the early warning of disease  
 385 outbreaks. The late detection networks mainly relied on sources with a national scope for  
 386 both EBS tools, corresponding to the role of the national veterinary authorities.

387 Early detection networks relied on both national and international sources as intermediates,  
 388 while late detection was mostly driven by international sources, as explained by the role of  
 389 the WOAAH in the official communication of events in the news.

390 Specialisation showed the same pattern between late and early detection and between the  
 391 EBS tools, with at least 75% of the primary sources being specialised (S1 Fig).

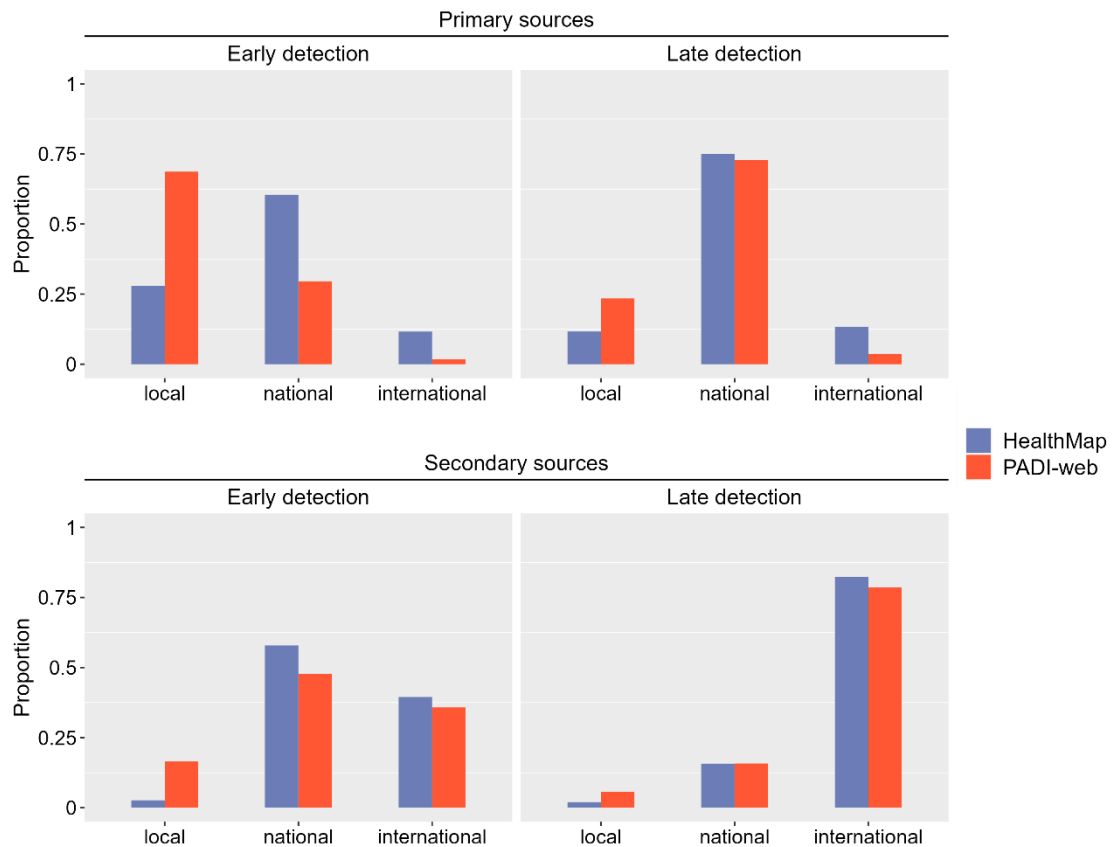

392

393 **Fig 5. Proportion of the geographic scope of primary and secondary sources in the PADI-**  
 394 **web and HealthMap early and late detection networks.**

## 395 Discussion

396 In this work, we described how outbreak-related information circulates in news sources  
 397 captured by two EBS tools, PADI-web and HealthMap. We assessed the EBS tools network,  
 398 including primary and secondary sources, and their characteristics in terms of type,  
 399 geographical scope, specialisation, and importance in the dissemination of information using  
 400 network centrality metrics. In addition, we assessed the timeliness of sharing officially notified  
 401 AI outbreak information.

## 402 **Global performances of PADI-web and HealthMap networks**

403 PADI-web and HealthMap, to varying extents, capture false positive news reports (with  
404 respective report precisions of 83% and 71%, respectively). Even if considered irrelevant for  
405 this study, most discarded news reports were related to AI events and contained contextual  
406 epidemiological information useful for risk assessment purposes, such as protective and  
407 control measures or global overviews of AI in a specific region. Both tools are prone to  
408 classifying human-related reports as animal-related events. When correctly identified, the  
409 detection of zoonotic events in humans is highly relevant from a health perspective. The  
410 automatic fine-grained topic classification of news reports still needs improvement to enable  
411 discrimination of outbreak declarations from other topics, thus avoiding false alerts and  
412 facilitating the triage of sanitary information (21).

413 The PADI-web was more sensitive than HealthMap. However, the proportion of early detected  
414 events compared to the total number of detected events was higher for HealthMap (43% vs.  
415 23%). These differences in captured events may reflect the different web scraping and filtering  
416 methods for online news monitoring of the PADI-web and HealthMap. PADI-web is an entirely  
417 automatised tool; thus, it captures and filters outbreak-related information without any  
418 human intervention. HealthMap is a semi-automatised tool with human moderators that filter  
419 news reports that will be shared with users. This may suggest that HealthMap moderators  
420 filter and keep only emerging exceptional AI events (such as primary cases), rather than all  
421 possible AI events (primary and secondary cases).

422 Our study highlights the complementarity of these two EBS tools. This complementarity  
423 reflects the different sources accessed through the EBS pipelines. Our results showed, for  
424 instance, that PADI-web captured more local sources than HealthMap, while the latter relied  
425 more heavily on social platforms such as Twitter. Barboza et al. (10) showed that the EBS tool  
426 characteristics such as the type of moderation, sources accessed, diseases, languages, and  
427 regions covered significantly influence disease detection performance, and that the system's  
428 outbreak detection is synergic (complementary). While the proportion of early detected  
429 events in our study may seem modest, it is a significant added value to the EBS regarding the  
430 reporting of outbreaks of pathogens with zoonotic and pandemic potential. In addition, both  
431 networks were highly reactive, mostly propagating information from primary sources to the  
432 aggregator in less than one day. Early detection of public health hazards constitutes a  
433 fundamental component of efficient outbreak management (22). It may be the main  
434 determinant in selecting the appropriate response, thus minimising morbidity and mortality

435 caused by an infectious disease (23). Event-based surveillance should not be considered a  
436 replacement for traditional indicator-based surveillance, but rather, complementary to  
437 routinely collected public health surveillance data.

438 While the reporting of AI events by the EBS tools was highly effective, timely, and reactive, a  
439 bottleneck may arise at the step of manual analysis of the detected events. The strength of  
440 EBS relies heavily on adequate human resources to feed decision-making chains based on  
441 detected events. Therefore, in our future work, we will explore how the detected events can  
442 be useful for risk assessment and risk mapping.

### 443 **Role of the sources**

444 Our results highlight three groups of sources regarding their role in the dissemination of  
445 outbreak-related information. EBS tools are aggregators. It is important to note that our  
446 results did not reflect ProMED-mail intrinsic performance as an EBS tool, that is, expert  
447 network sharing outbreak-related information, but as an intermediate source of HealthMap.  
448 Local and national authorities and veterinarians were emitters and were the most important  
449 primary sources of events. They produce information that is acknowledged at the  
450 local/national level, mostly verified by laboratory tests, and is susceptible to being reported  
451 in the media. WOA, online news, press agencies, social media, and several research  
452 organisations combined both abilities by collecting information from a wide range of sources  
453 and being highly visible by collector sources in the network (online news, EBS tools). Network  
454 performance was driven by the presence of a small number of sources with high individual all-  
455 degrees, such as WOA, Reuters, Xinhua, and several social network platforms. These sources  
456 played the role of hubs, not only filtering and disseminating information but also ensuring a  
457 connection between different groups in the network (19). The presence of hubs was not the  
458 only feature of network performance, as early detection mostly relied on online news sources  
459 with individual low all-degrees. Thus, the early components of EBS networks also relied on  
460 their ability to monitor a large number of individually low-performant sources.

461 National online news plays a major role in early detection by disseminating announcements  
462 from local and national veterinary authorities, thus making them detectable by EBS tools.  
463 Zhang et al. found out that national newspapers (referred to as “local” newspapers in their  
464 methods) provided more specific information about the local Zika virus emergence in Brazil  
465 than did international newspapers; similar findings were made for outbreak detection in  
466 Nepal (12). In a recent study, local sources were more likely to identify a unique event than  
467 international sources, indicating that international sources were more likely to be redundant

468 by publishing multiple reports about the same event (18). This emphasises the need to target  
469 local and national sources available on the web, going beyond sources published in English.  
470 The monitoring of multi-lingual sources, integrated into the two EBS tools in our work, is a  
471 prerequisite for maximising access to national and local media. The retrieval and analysis of  
472 non-English texts have been enhanced and facilitated by the improvement of methods for  
473 multi-lingual text processing, such as textual classification (25,26) and deep-learning-based  
474 translation (27). We believe that efforts to integrate multi-lingual sources will benefit both the  
475 Se and timeliness of EBS tools.

476 Social platforms, mostly used by HealthMap, include generic platforms such as Twitter, but  
477 also specialised blogs such as FluTrackers and AvianFluDiary. Specialised blogs are relevant  
478 sources for integration into EBS, as they rely on the collection of information from numerous  
479 sources, as highlighted by their high median in-degree, previously filtered by domain-  
480 specialised moderators. Health blogs were found to cite less sources than online news in a  
481 study evaluating H1N1/Swine Flu coverage in the media (28), which is not in line with the  
482 highest in-degree found in our study. However, the difference in the number and nature of  
483 sources evaluated (eight online news (28)) makes the study hardly comparable. They also  
484 translated news from national languages into English, facilitating access to local field  
485 information. In addition, owing to their non-official status, online blogs are more prone to  
486 communicate events before official notifications. While the classical method of web  
487 monitoring is traditionally keyword-oriented (e.g., systematic monitoring of combinations of  
488 keywords), source-based monitoring (i.e., systematic monitoring of a specific source) is a  
489 costless and easy way to improve existing EBS tools. For instance, retrieving news directly  
490 from official government health websites would enhance the geographic representativeness  
491 of news aggregators such as Google News (29,30).

492 It is important to note that our results were specific to the model disease and study period.  
493 For example, the Bulgarian veterinary authority appeared to be an important source because  
494 22 outbreaks were observed in Bulgaria during the study period, including a new incursion of  
495 the Highly Pathogenic Avian Influenza (HPAI) H5N8 subtype (31) widely reported by Bulgarian  
496 media.

## 497 **Re-thinking the role of event-based surveillance in epidemic** 498 **intelligence**

499 EBS is sometimes opposed to indicator-based surveillance, as it is based on the use of so-called  
500 nonofficial sources. In our study, official veterinary authorities (national or local) represented



501 80% of primary sources, including those involved in early detection. Thus, the monitoring of  
502 the PADI-web and HealthMap was mainly characterised by the detection of national or local  
503 official events. This detection includes both the dissemination of WOAH-notified outbreaks  
504 (late detection) and the dissemination of official events that have not yet been notified (early  
505 detection). In the latter case, EBS tools bypass the international notification procedure and its  
506 inherent delays. These findings are consistent with the latest and broader definitions of EBS,  
507 stating that media sources collected in the context of EBS can be either official (e.g. a Ministry  
508 of Health website) or non-official (e.g. newspaper) (32).

509 Although the extraction of epidemiological information from collected reports has been  
510 widely studied, the automatic extraction of cited sources of events from online sources has  
511 not yet received attention. However, based on the findings of our study, we believe that this  
512 feature would enhance informal surveillance by enabling the characterisation of an event as  
513 official at the international, national, or local level, depending on whether the cited source is  
514 the WOAH, a national/local veterinary authority, or non-official, if the type of source does not  
515 belong to any of the latest categories. Recent advances in named entity extraction, involving  
516 deep learning, combined with a step of normalisation (dictionary or ontology-based), would  
517 enable easy identification of the mentioned cited sources. Alerts could be triggered when  
518 WOAH is not mentioned. By providing our corpus and databases with open access, we offer  
519 the possibility of evaluating and comparing approaches with a high-quality validation dataset.

520 Both the EBS tools detected several events that could not be found in the EMPRES-i database  
521 (S10 Table). These events may have been local AI events that were not communicated at the  
522 international level; thus, they did not appear in the EMPRES-i database. They may also  
523 correspond to a suspected event that was negated after a negative laboratory test result for  
524 the AI virus or to a false alert, as mentioned in a previous study (33). Thus, our study shows  
525 that EBS tools can be a source of relevant outbreak information but should be considered  
526 complementary to official sources and interpreted with caution. The identification and  
527 characterisation of the sources linked in an EBS are important for prioritising the ones  
528 regarding truthfulness and reliability. It may be a way of dealing with fake news, for example,  
529 by targeting specialised sources. Our study sets the first list of these sources. By extending our  
530 approach to emerging zoonotic infectious diseases, the corpora of reliable news sources may  
531 be enriched.

## 532 **Conclusion**

533 Current EBS tools use a diverse, but not identical, network of sources; thus, they can be used  
534 in parallel by EI practitioners. In addition, both EBS tools should prioritise specialised media  
535 sources and access, when existing, to local and national veterinary authorities' webpages, as  
536 they released part of the official event before the international notification to the WOA. H.  
537 Outbreak-related news travels from a primary source to a final aggregator in one day or less,  
538 which is important for early warnings and EI. Both PADI-web and HealthMap shared timely  
539 outbreak information on AI in domestic and wild birds, thus contributing to the early detection  
540 of EI and as complementary sources to traditional surveillance.

541 A potential future work could be the integration of the results highlighted in this study to  
542 improve EBS systems (for instance, by weighting type of sources in EBS platforms). As  
543 mentioned in this paper, we can cite multi-lingual aspects to consider for improving the  
544 proposed analysis as well as EBS systems. We could evoke the same type of analysis to conduct  
545 with other platforms as well, such as ProMED-mail.

## 546 **Acknowledgements**

547 We thank the HealthMap project (<https://healthmap.org/>), which kindly provided us with  
548 their data. We acknowledge the reviewer for their constructive comments.

## 549 **Data reporting**

550 The data used for this study is available at:

551 <https://doi.org/10.5281/zenodo.7324144>

## 552 **Statistical reporting**

553 The code used for the analysis and figures is available at:

554 <https://github.com/SarahVal/EBS-network>.

555

## 556 **Author Contributions**

557 **Sarah Valentin:** Conceptualisation, Methodology, Data Curation, Formal Analysis,  
558 Validation, Writing – Original Draft Preparation, Writing – Review & Editing

559 **Bahdja Boudoua:** Data Curation, Formal Analysis, Writing – Original Draft Preparation,  
560 Writing – Review & Editing

561 **Kara Sewalk:** Data Curation, Writing – Review & Editing

562 **Nejat Arinik:** Visualization, Writing – Review & Editing

563 **Mathieu Roche:** Conceptualization, Supervision, Resources, Writing – Review & Editing

564 **Renaud Lancelot:** Conceptualization, Supervision, Resources, Writing – Review & Editing

565 **Elena Arsevska:** Conceptualization, Methodology, Data Curation, Writing – Original Draft  
566 Preparation, Writing – Review & Editing

## 567 **Supporting information**

568 **S1 Table. Definitions used to characterize the types of sources, specialization and**  
569 **geographical focus in PADI-web and HealthMap networks.**

570 **S2 Table. Summary of the manual curation of the relevance of PADI-web and HealthMap**  
571 **reports.**

572 **S3 Table. The number of events reported to the WOAHA and detected by the two EBS**  
573 **tools per week (mean, min, and max) and per region.**

574 **S1 Fig. PADI-web (A) and Healthmap (B) networks.** Sources were grouped by type. The edge  
575 colour corresponds to the colour of the incoming source type, thus enabling the visualisation  
576 of the direction of information dissemination, that is, orange edges represent incoming edges  
577 to an EBS tool.

578 **S4 Table. Legend of the node's names in the PADI-web network.**

579 **S5 Table. Legend of the node's names in the HealthMap network.**

580 **S6 Table. PADI-web network composition.**

581 **S7 Table. HealthMap network composition.**

582 **S8 Table. Proportion of the types of sources according to their role in the (a) PADI-web and**  
583 **(b) HealthMap late detection networks.**

584 **S9 Table. Proportion of the types of sources according to their role in the (a) PADI-web and**  
585 **(b) HealthMap early detection networks.**

586 **S2 Fig. Type of specialization of primary and secondary sources for the detection of early**  
587 **and late events in PADI-web and HealthMap networks**

588 **S10 Table. Type of primary and secondary sources involved in the detection and**  
589 **transmission of non-official events in PADI-web and HealthMap networks.**

## 590 **References**

591

592 1. Paquet C, Coulobier D, Kaiser R, Ciotti M. Epidemic intelligence: a new framework for  
593 strengthening disease surveillance in Europe. *Eurosurveillance*. 1 déc 2006;11(12):5- 6.

- 594 2. Wilburn J, O'Connor C, Walsh AL, Morgan D. Identifying potential emerging threats  
595 through epidemic intelligence activities—looking for the needle in the haystack?  
596 *International Journal of Infectious Diseases*. 1 déc 2019;89:146- 53.
- 597 3. Kaiser R, Coulombier D, Baldari M, Morgan D, Paquet C. What is epidemic intelligence,  
598 and how is it being improved in Europe? *Weekly releases (1997–2007)*. 2 févr  
599 2006;11(5):2892.
- 600 4. Freifeld CC, Mandl KD, Reis BY, Brownstein JS. HealthMap: Global Infectious Disease  
601 Monitoring through Automated Classification and Visualization of Internet Media  
602 Reports. *Journal of the American Medical Informatics Association*. 1 mars  
603 2008;15(2):150- 7.
- 604 5. Valentin S, Arsevska E, Falala S, de Goër J, Lancelot R, Mercier A, et al. PADI-web: A  
605 multilingual event-based surveillance system for monitoring animal infectious diseases.  
606 *Computers and Electronics in Agriculture*. 1 févr 2020;169:105163.
- 607 6. Bhatia S, Lassmann B, Cohn E, Desai AN, Carrion M, Kraemer MUG, et al. Using digital  
608 surveillance tools for near real-time mapping of the risk of infectious disease spread. *npj*  
609 *Digital Medicine*. 16 avr 2021;4(1):1- 10.
- 610 7. Arsevska E, Valentin S, Rabatel J, Hervé J de G de, Falala S, Lancelot R, et al. Web  
611 monitoring of emerging animal infectious diseases integrated in the French Animal  
612 Health Epidemic Intelligence System. *PLOS ONE*. août 2018;13(8):e0199960.
- 613 8. Valentin S, Mercier A, Lancelot R, Roche M, Arsevska E. Monitoring online media reports  
614 for early detection of unknown diseases: insight from a retrospective study of COVID-19  
615 emergence. *Transboundary and Emerging Diseases* [Internet]. 19 juill 2020 [cité 28 juill  
616 2020]; Disponible sur: <https://onlinelibrary.wiley.com/doi/abs/10.1111/tbed.13738>
- 617 9. Plateforme ESA [Internet]. [cité 1 nov 2022]. Disponible sur: <https://plateforme-esa.fr/fr>
- 618 10. Barboza P, Vaillant L, Le Strat Y, Hartley DM, Nelson NP, Mawudeku A, et al. Factors  
619 influencing performance of internet-based biosurveillance systems used in epidemic  
620 intelligence for early detection of infectious diseases outbreaks. *PLoS ONE*. 5 mars  
621 2014;9(3):e90536.
- 622 11. Barboza P, Vaillant L, Mawudeku A, Nelson NP, Hartley DM, Madoff LC, et al. Evaluation  
623 of epidemic intelligence systems integrated in the Early Alerting and Reporting project  
624 for the detection of A/H5N1 influenza events. Nishiura H, éditeur. *PLoS ONE*. 5 mars  
625 2013;8(3):e57252.
- 626 12. Schwind JS, Norman SA, Karmacharya D, Wolking DJ, Dixit SM, Rajbhandari RM, et al.  
627 Online surveillance of media health event reporting in Nepal: digital disease detection  
628 from a One Health perspective. *BMC International Health and Human Rights*. 21 sept  
629 2017;17(1):26.
- 630 13. Xu Y, Gong P, Wielstra B, Si Y. Southward autumn migration of waterfowl facilitates  
631 cross-continental transmission of the highly pathogenic avian influenza H5N1 virus. *Sci*  
632 *Rep*. 10 août 2016;6(1):30262.
- 633 14. Mostafa A, Abdelwhab EM, Mettenleiter TC, Pleschka S. Zoonotic Potential of Influenza  
634 A Viruses: A Comprehensive Overview. *Viruses*. 13 sept 2018;10(9):497.

- 635 15. Welte VR, Terán MV. Emergency Prevention System (EMPRES) for Transboundary  
636 Animal and Plant Pests and Diseases. The EMPRES-Livestock: An FAO Initiative. *Annals of*  
637 *the New York Academy of Sciences*. 2004;1026(1):19- 31.
- 638 16. Farnsworth ML, Hamilton-West C, Fitchett S, Newman SH, de La Rocque S, De Simone L,  
639 et al. Comparing national and global data collection systems for reporting, outbreaks of  
640 H5N1 HPAI. *Preventive Veterinary Medicine*. 1 juill 2010;95(3):175- 85.
- 641 17. Kolaczyk ED. *Statistical Analysis of Network Data: Methods and Models*. 1st éd. Springer  
642 Publishing Company, Incorporated; 2009.
- 643 18. Kolaczyk ED. Descriptive Analysis of Network Graph Characteristics. In: Kolaczyk ED,  
644 éditeur. *Statistical Analysis of Network Data: Methods and Models*. New York, NY:  
645 Springer; 2009. p. 1- 44. (Springer Series in Statistics).
- 646 19. Weber MS, Monge P. The Flow of Digital News in a Network of Sources, Authorities, and  
647 Hubs. *Journal of Communication*. déc 2011;61(6):1062- 81.
- 648 20. Csardi G, Nepusz T. The igraph software package for complex network research.  
649 *InterJournal*. 2006;Complex Systems:1695.
- 650 21. Valentin S, Arsevska E, Vilain A, De Waele V, Lancelot R, Roche M. Elaboration of a new  
651 framework for fine-grained epidemiological annotation. *Scientific Data*. 26 oct  
652 2022;9(1):655.
- 653 22. Adini B, Singer SR, Ringel R, Dickmann P. Earlier detection of public health risks – Health  
654 policy lessons for better compliance with the International Health Regulations (IHR  
655 2005): Insights from low-, mid- and high-income countries. *Health Policy*. oct  
656 2019;123(10):941- 6.
- 657 23. Yan SJ, Chughtai AA, Macintyre CR. Utility and potential of rapid epidemic intelligence  
658 from internet-based sources. *International Journal of Infectious Diseases*. 1 oct  
659 2017;63:77- 87.
- 660 24. Yoon S, Odlum M, Broadwell P, Davis N, Cho H, Deng N, et al. Application of Social  
661 Network Analysis of COVID-19 Related Tweets Mentioning Cannabis and Opioids to Gain  
662 Insights for Drug Abuse Research. *Stud Health Technol Inform*. 26 juin 2020;272:5- 8.
- 663 25. Mutuvi S, Boros E, Doucet A, Jatowt A, Lejeune G, Odeo M. Multilingual Epidemiological  
664 Text Classification: A Comparative Study. In: *Proceedings of the 28th International*  
665 *Conference on Computational Linguistics [Internet]*. Barcelona, Spain (Online):  
666 International Committee on Computational Linguistics; 2020. p. 6172- 83. Disponible  
667 sur: <https://aclanthology.org/2020.coling-main.543>
- 668 26. Névéol A, Dalianis H, Velupillai S, Savova G, Zweigenbaum P. Clinical Natural Language  
669 Processing in languages other than English: opportunities and challenges. *Journal of*  
670 *Biomedical Semantics*. 30 mars 2018;9(1):12.
- 671 27. Singh SP, Kumar A, Darbari H, Singh L, Rastogi A, Jain S. Machine translation using deep  
672 learning: An overview. In: *2017 International Conference on Computer, Communications*  
673 *and Electronics (Comptelix)*. 2017. p. 162- 7.

- 674 28. Gao F, Zhang M, Sadri S. Newspapers Use More Sources Compared to Health Blogs in  
675 H1N1/Swine Flu Coverage. *Newspaper Research Journal*. 1 mars 2011;32(2):89- 96.
- 676 29. Feldman J, Thomas-Bachli A, Forsyth J, Patel ZH, Khan K. Development of a global  
677 infectious disease activity database using natural language processing, machine  
678 learning, and human expertise. *J Am Med Inform Assoc*. 30 juill 2019;26(11):1355- 9.
- 679 30. Zhang Y, Ibaraki M, Schwartz FW. Disease surveillance using online news: Dengue and  
680 zika in tropical countries. *J Biomed Inform*. févr 2020;102:103374.
- 681 31. Zecchin B, Goujgoulova G, Monne I, Salviato A, Schivo A, Slavcheva I, et al. Evolutionary  
682 Dynamics of H5 Highly Pathogenic Avian Influenza Viruses (Clade 2.3.4.4B) Circulating in  
683 Bulgaria in 2019–2021. *Viruses*. oct 2021;13(10):2086.
- 684 32. Tu W, Jin L, Ni D. Early Warning Practice Using Internet-Based Data. *Early Warning for*  
685 *Infectious Disease Outbreak*. 2017;231- 41.
- 686 33. Barboza P. Evaluation of epidemiological intelligence systems applied to the early  
687 detection of infectious diseases worldwide. 2015;122.
- 688

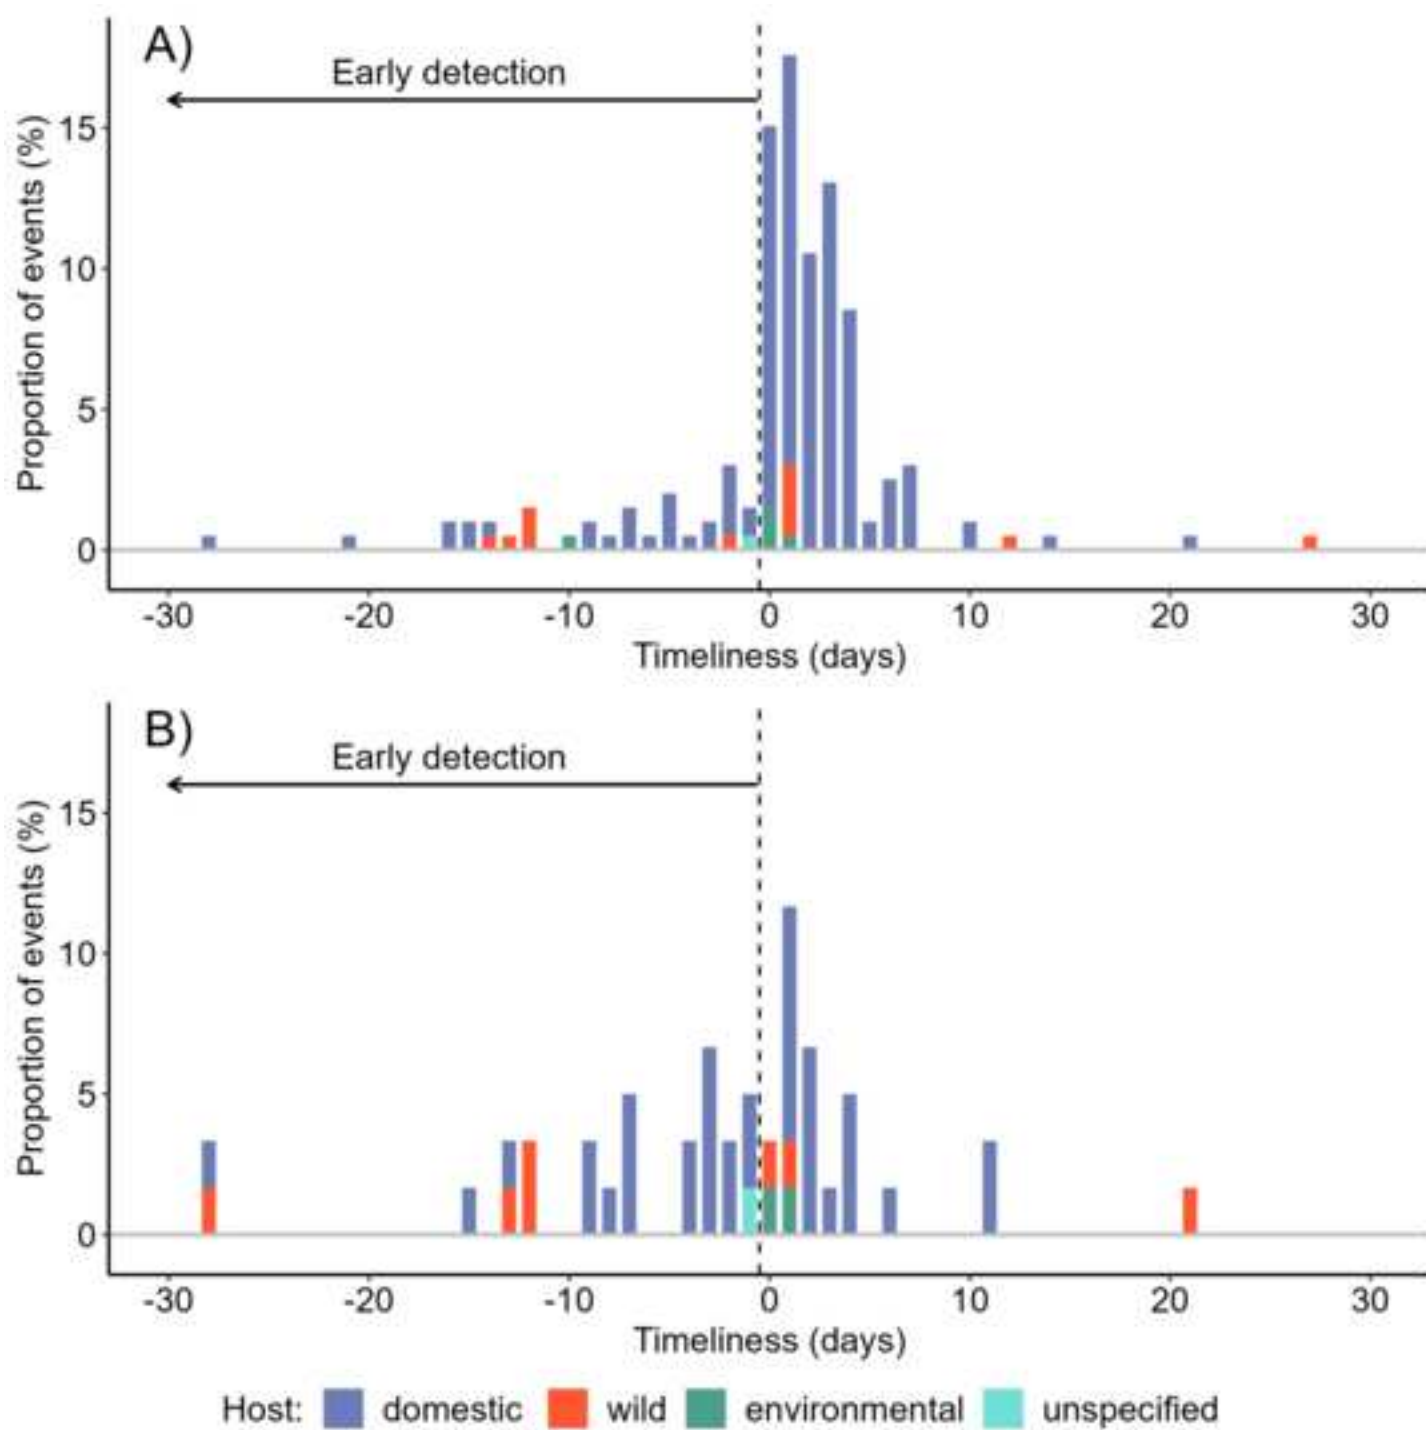

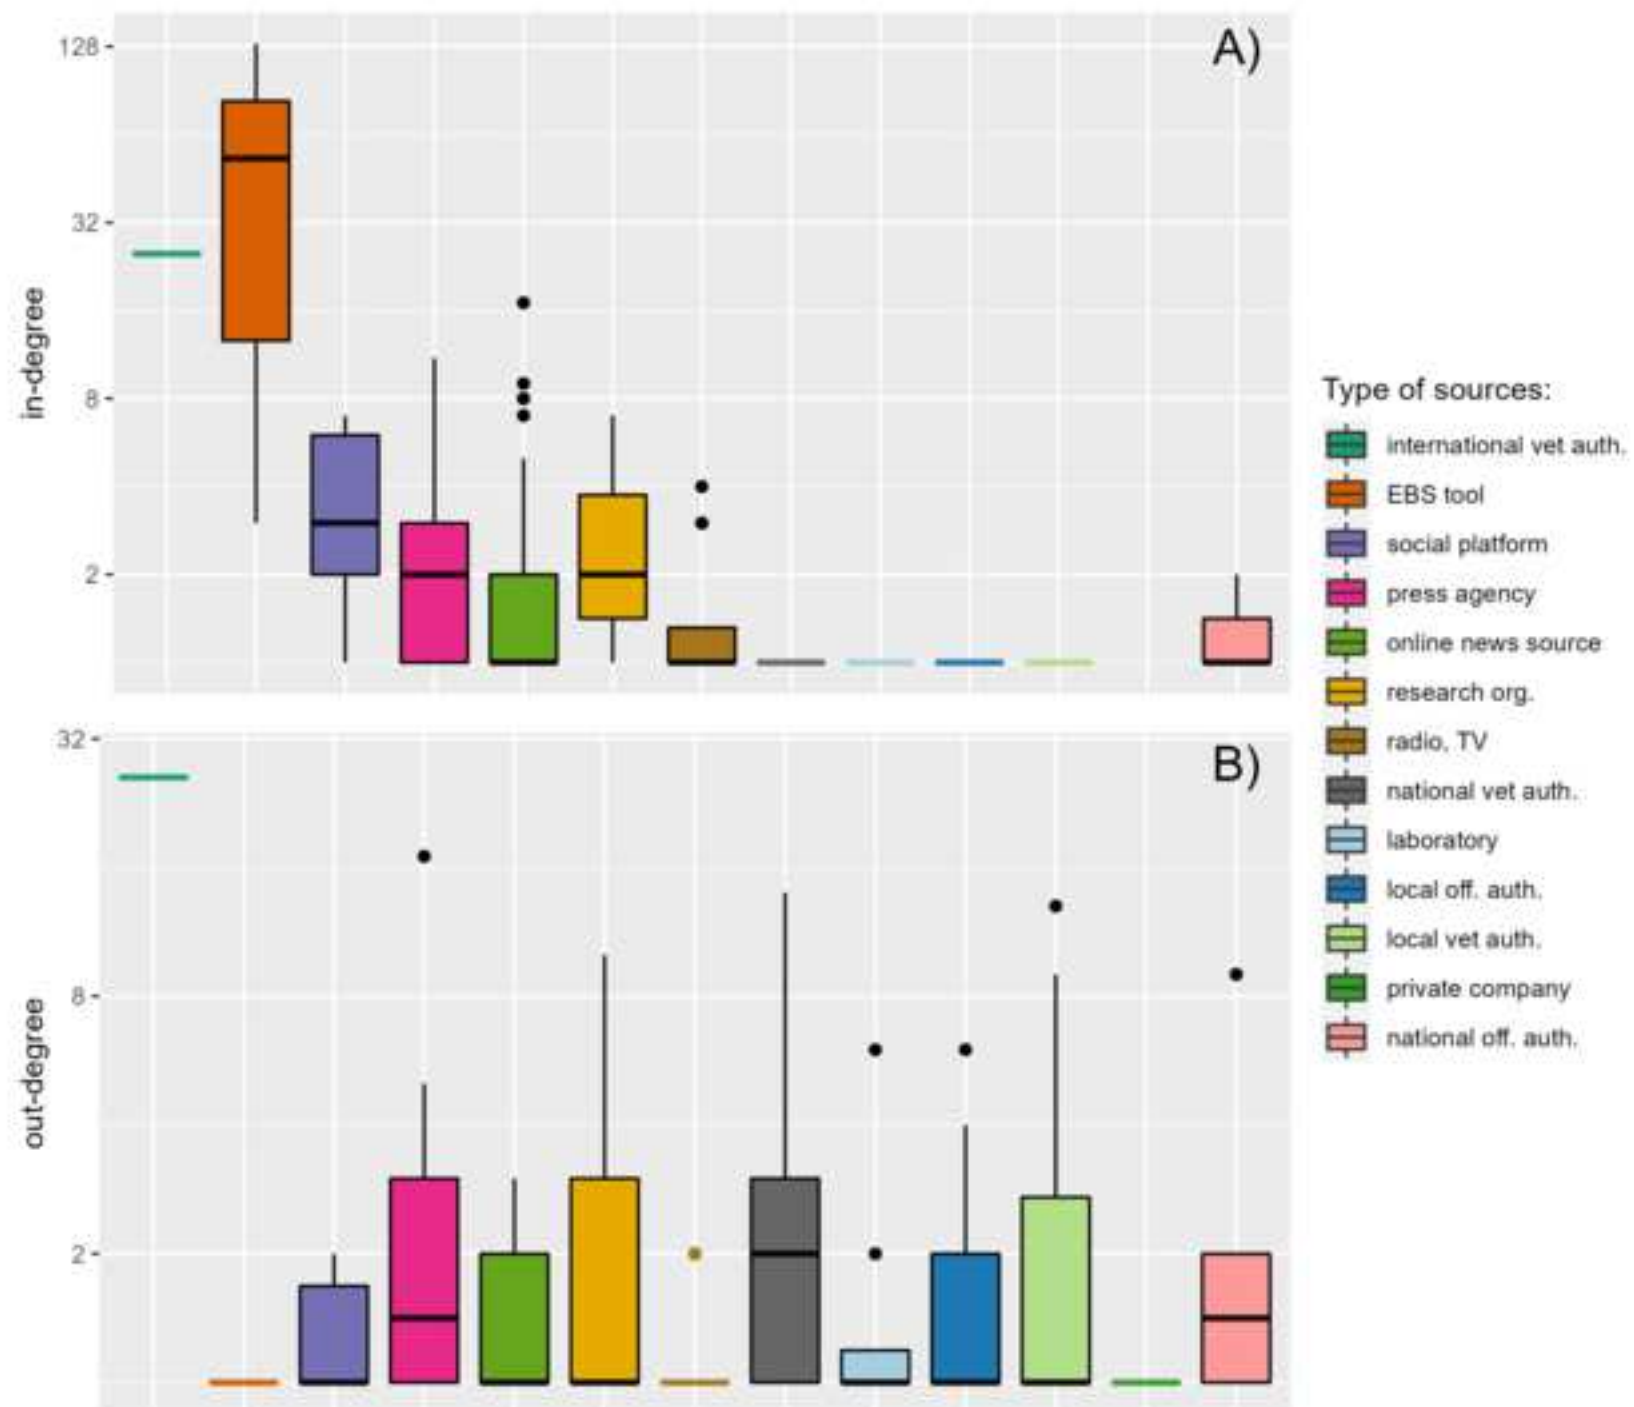



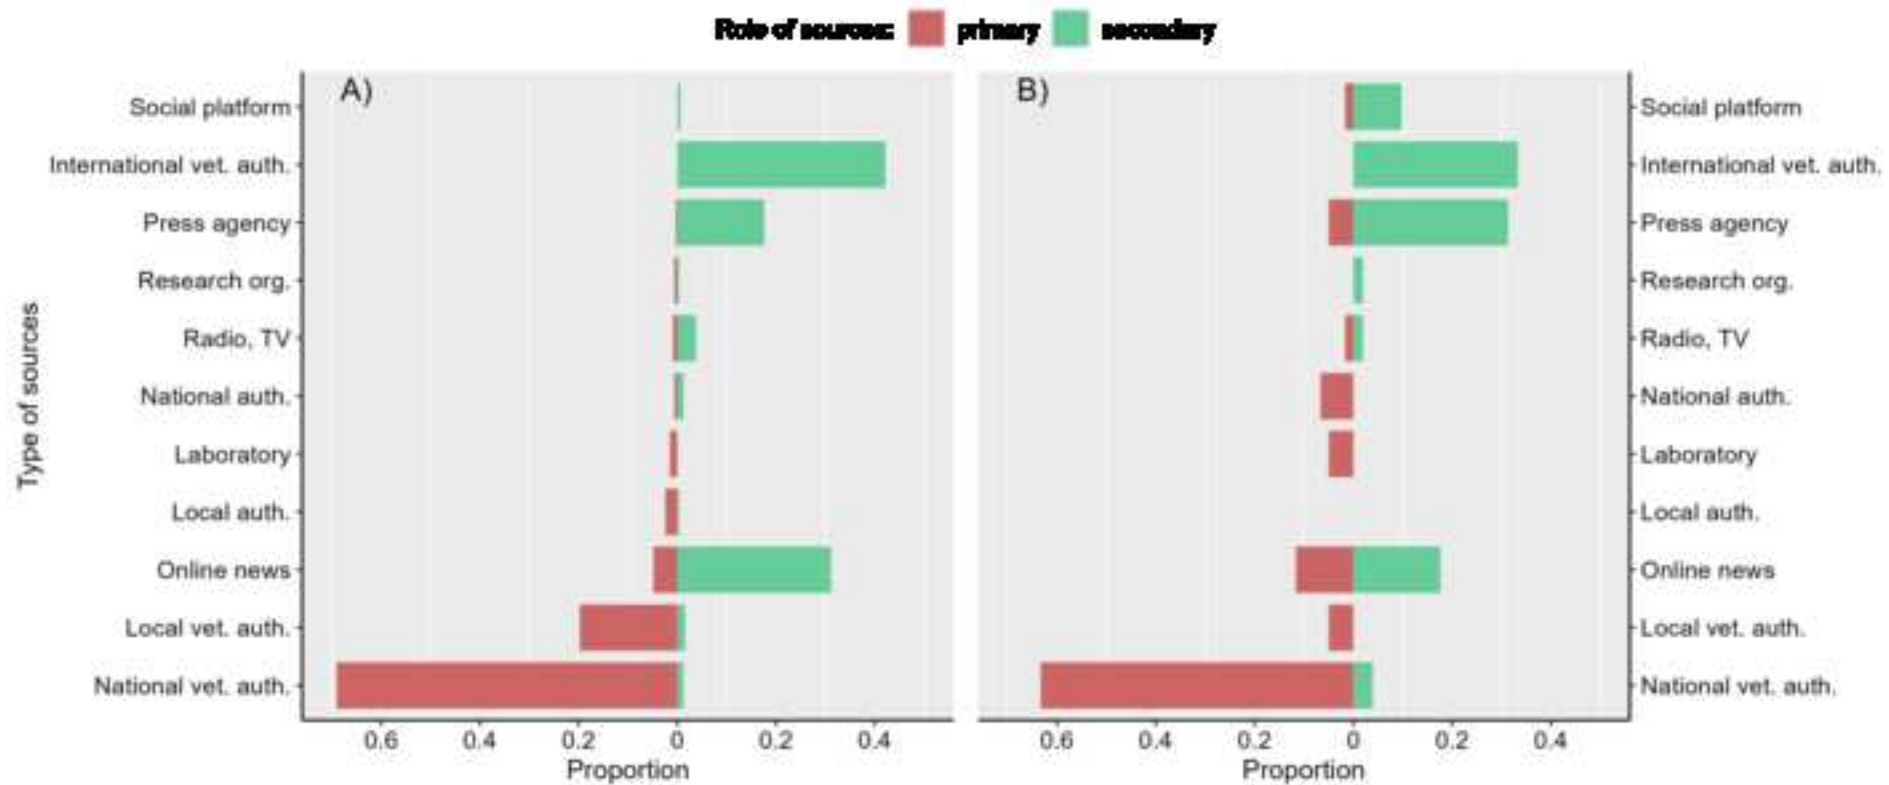

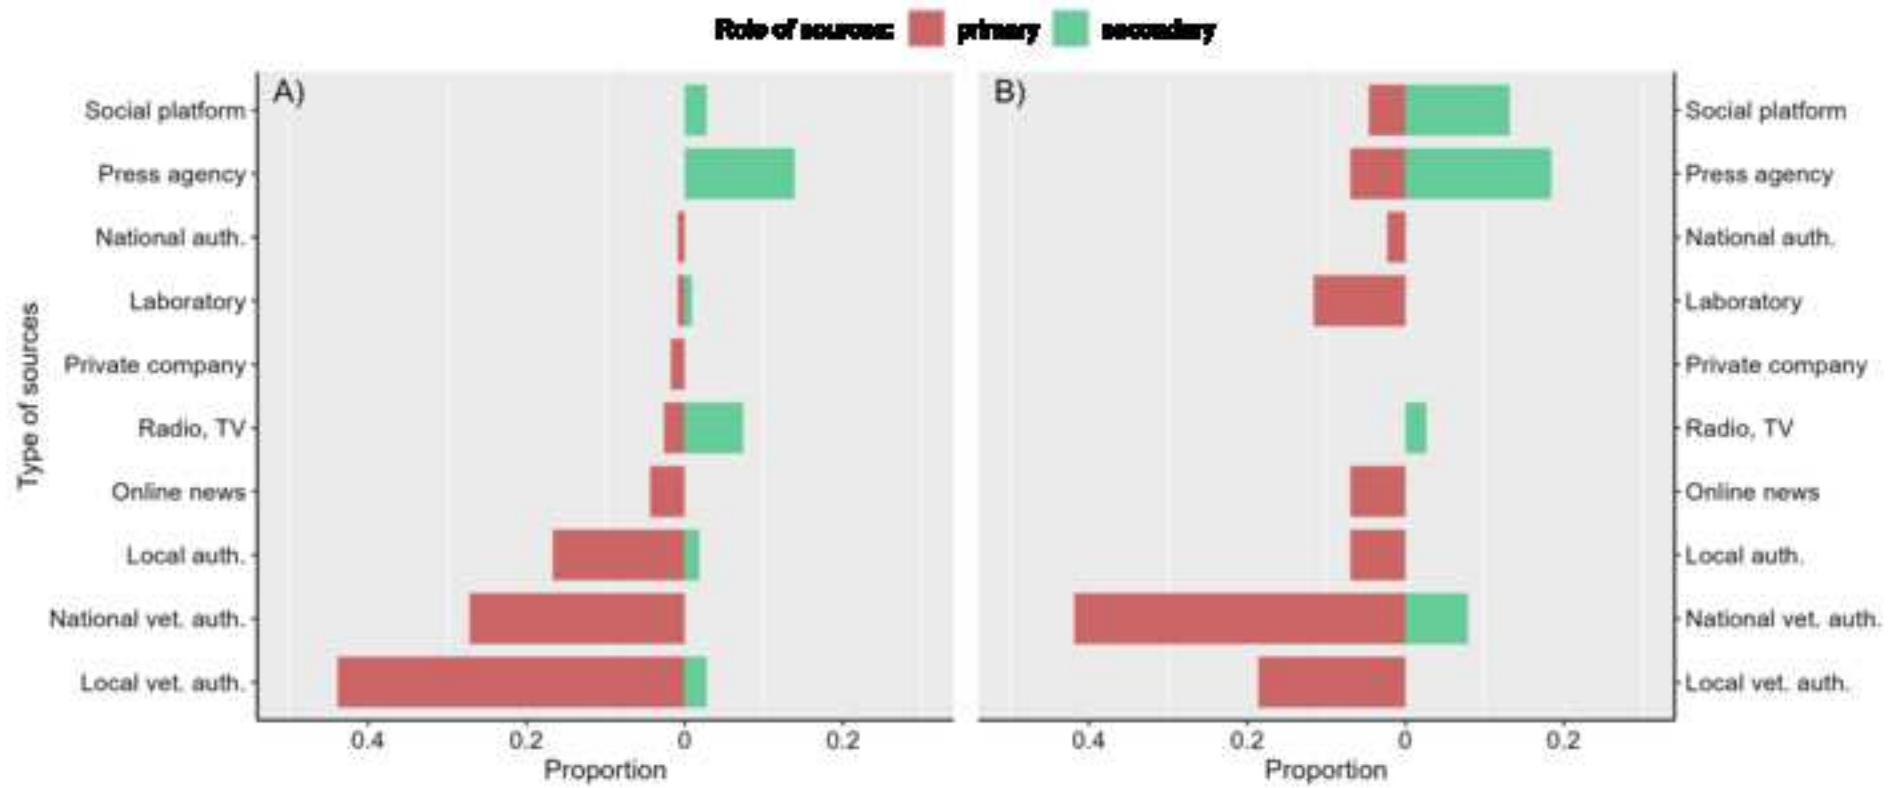

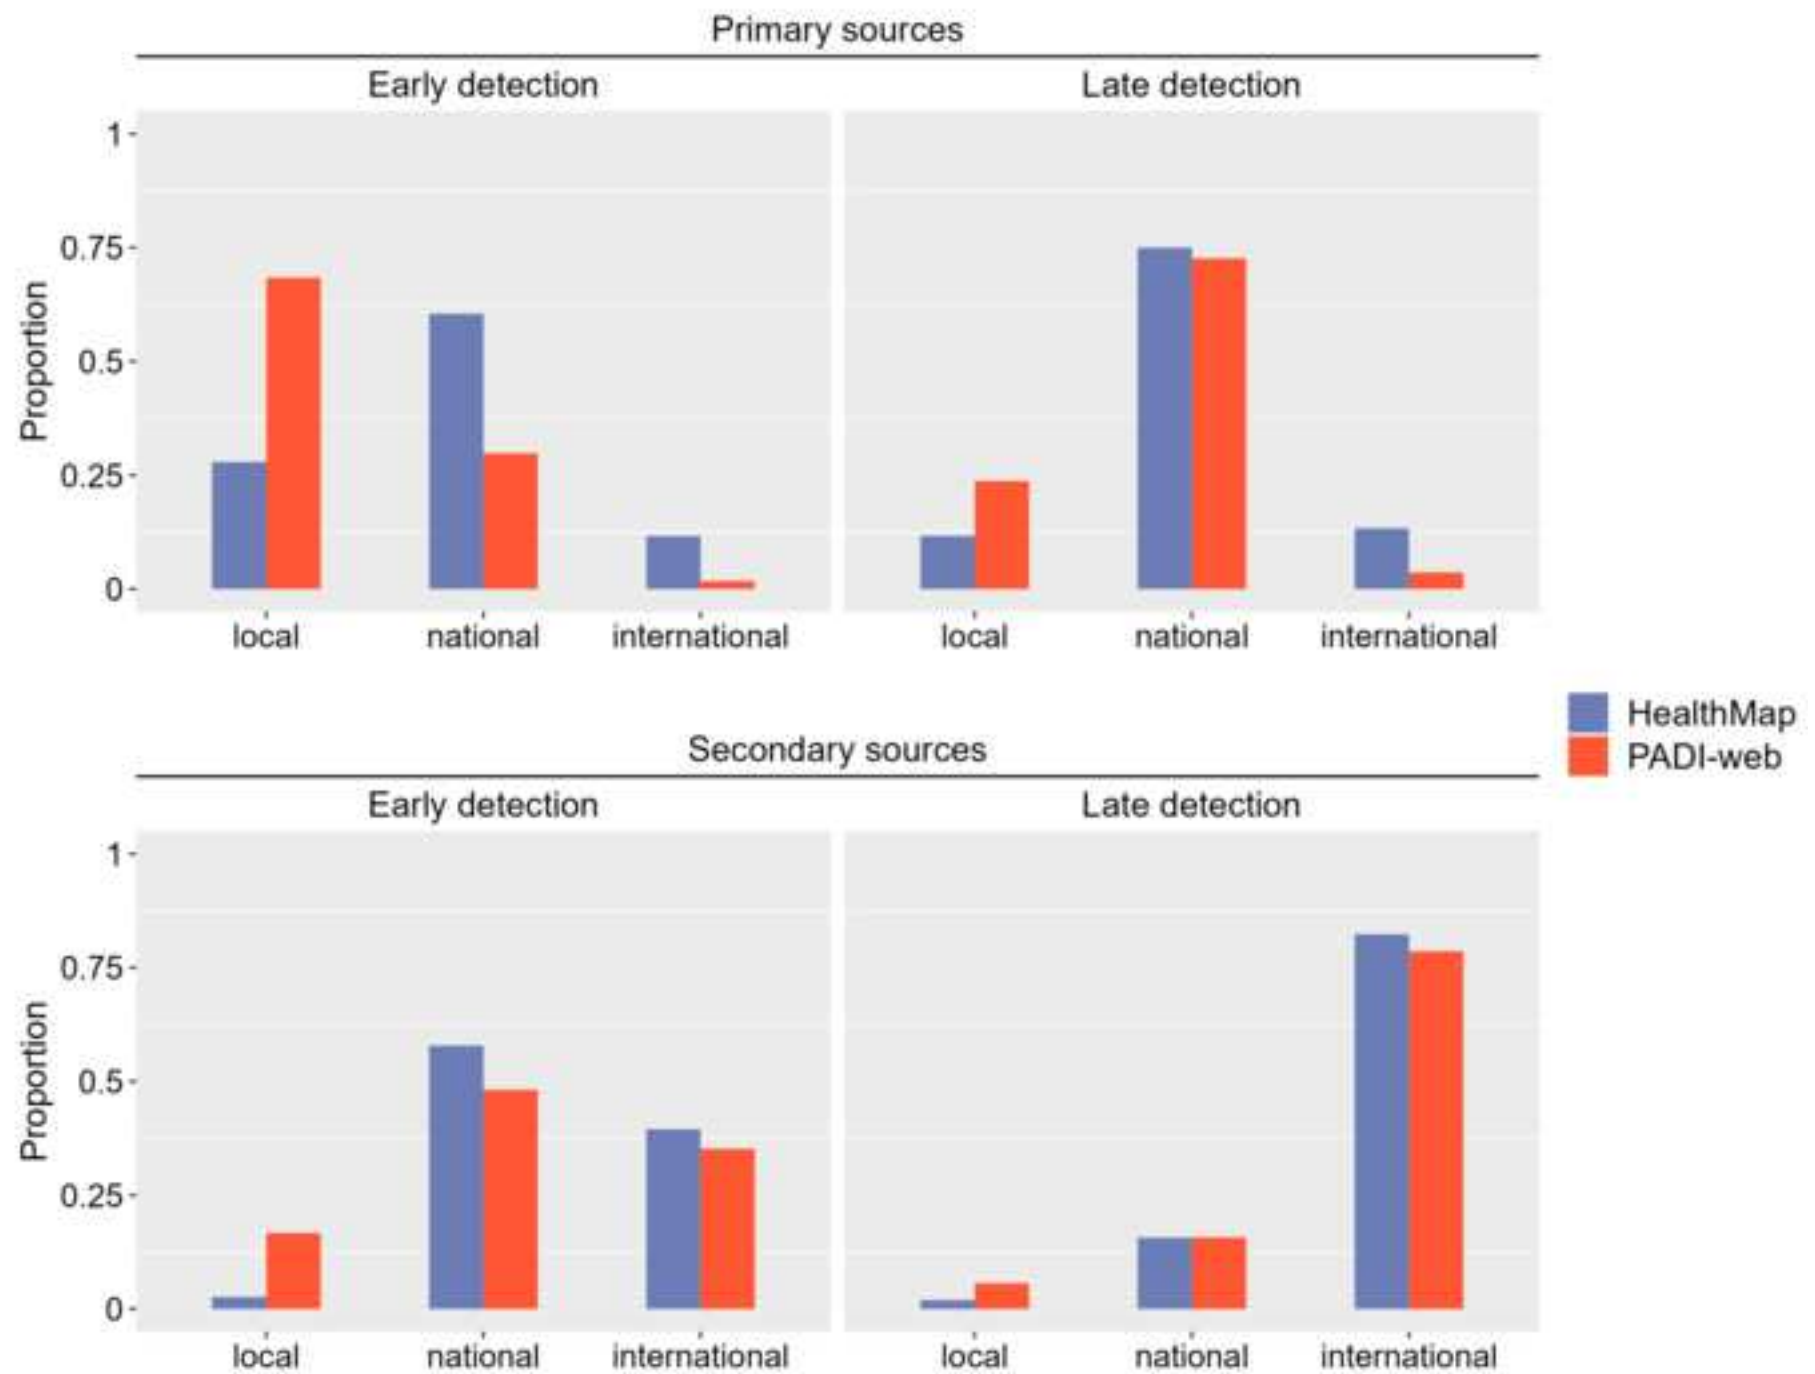

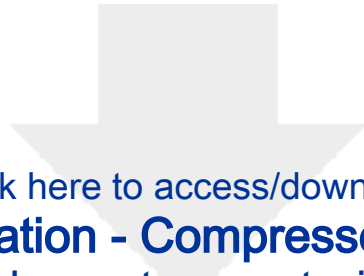

[Click here to access/download](#)

**Supporting Information - Compressed/ZIP File Archive**  
Supplementary material.zip

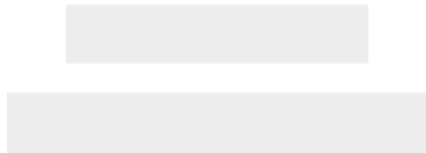

# Dissemination of information in event-based surveillance, a case study of Avian Influenza

Sarah Valentin<sup>1,2,3,4¶</sup>, Bahdja Boudoua<sup>1,2¶</sup>, Kara Sewalk<sup>5</sup>, Nejat Arinik<sup>2</sup>, Mathieu Roche<sup>1,2,3</sup>,  
Renaud Lancelot<sup>1,3</sup>, Elena Arsevska<sup>1,3\*</sup>

<sup>1</sup> Joint Research Unit Animal, Health, Territories, Risks, Ecosystems (UMR ASTRE), French Agricultural Research Centre for International Development (CIRAD), National Research Institute for Agriculture, Food and Environment (INRAE), Montpellier, France

<sup>2</sup> Joint Research Unit Land, Environment, Remote Sensing and Spatial Information (UMR TETIS), Université de Montpellier, AgroParisTech, French Agricultural Research Centre for International Development (CIRAD), French National Centre for Scientific Research (CNRS), National Research Institute for Agriculture, Food and Environment (INRAE), Montpellier, France

<sup>3</sup> French Agricultural Research Centre for International Development (CIRAD),- Montpellier, France

<sup>4</sup> Département de biologie, Université de Sherbrooke, Sherbrooke, Canada

<sup>5</sup> Computational Epidemiology Group, Boston Children's Hospital, Boston, United States

¶ These authors contributed equally to this work

\*Corresponding author

E-mail: elena.arsevska@cirad.fr (EA)

## ORCID affiliations

Sarah Valentin <https://orcid.org/0000-0002-9028-681X>

Bahdja Boudoua <https://orcid.org/0000-0001-6174-3252>

Kara Sewalk <https://orcid.org/0000-0002-2917-0869>

Nejat Arinik <https://orcid.org/0000-0001-5080-4320>

Mathieu Roche <https://orcid.org/0000-0003-3272-8568>

Renaud Lancelot <https://orcid.org/0000-0002-5826-5242>

Elena Arsevska <https://orcid.org/0000-0002-6693-2316>

**Commented [EA1]:** Full name provided for all affiliations as according to PlosOne guidelines

## Abstract

Event-Based Surveillance (EBS) tools, such as HealthMap and PADI-web, monitor online news reports and other unofficial sources, with the primary aim to provide timely information [to users from health agencies](#) on disease outbreaks occurring worldwide.

In this work, we describe how outbreak-related information disseminates from a primary source, via a secondary source, ~~to until~~ a definitive aggregator, an EBS tool, during the 2018/19 avian influenza season. We analysed 337 news [items](#) from [the](#) PADI-web and 115 news [articles](#) from HealthMap ~~EBS tools~~, reporting avian influenza outbreaks in birds worldwide between July 2018 and June 2019. We used the sources cited in the news to trace the path of each outbreak. We ~~have~~ built a directed network, with nodes representing the sources (characterised by type, specialisation, and geographical focus) and edges representing the flow of information. We calculated [the](#) degree as a centrality measure to determine the importance of [the](#) nodes in information dissemination. We analysed the role of the sources in early detection (detection of an event before its [official](#) notification) to the World Organisation for Animal Health (WOAH) and late detection.

A total of 23% and 43% of the avian influenza outbreaks detected by [the](#) PADI-web and HealthMap, respectively, were shared ~~in a timely manner on time~~, before their notification. ~~For~~ both tools, national and local veterinary authorities were the ~~major~~ primary sources of early detection. The early detection component mainly relied on the dissemination of nationally ~~acknowledged~~ events by online news and press agencies, by-passing international reporting to the WAOH. ~~The~~ WAOH was the major secondary source for late detection, occupying a central position between national authorities and disseminator sources, such as online news. PADI-web and HealthMap were highly complementary in terms of detected sources, explaining ~~why that~~ 90% of the events were detected by only one of ~~both~~ tools.

We show that current EBS tools can ~~timely~~ provide [timely](#) ~~complete~~ outbreak-related information and ~~we provide~~ priority news sources to improve digital disease surveillance.

[Keywords: event-based surveillance, digital disease detection, network analysis, avian influenza](#)

## Introduction

59  
60 Recent developments in internet and digital technologies have contributed to the  
61 ~~establishment~~~~set-up~~ of the Epidemic Intelligence (EI) framework, aiming at ~~the~~ early  
62 identification of potential health threats from sources of intelligence of any nature, their  
63 verification, and assessment for timely prevention and control by public and animal health  
64 (PH/AH) agencies. Event-based surveillance (EBS), as part of the EI, gathers unstructured data  
65 on potential and non-verified disease outbreaks mainly by monitoring the web, such as online  
66 media, social networks, and blogs. The EBS is complementary to ~~the~~-traditional, indicator-  
67 based surveillance (IBS), also part of the EI, which collects structured data on verified disease  
68 outbreaks through routine national surveillance systems (1–3).

69 Since the early 2000s, several automatized EBS tools with open-access have been created,  
70 such as HealthMap, operating since 2006 and monitoring web sources for ~~the~~ public, animal,  
71 and plant health threats (4), and PADI-web, operating since 2016 and monitoring web sources  
72 for mainly animal health threats (5). The two open-access tools are used for the detection and  
73 monitoring of potential outbreaks reported in non-official sources on the web, including  
74 known diseases, such as avian influenza or Ebola (6,7), or clinical signs of unknown origin, such  
75 as acute respiratory syndrome (8). The main users of the two tools are EI staff at national and  
76 supranational PH/AH agencies and organizations, among others ~~such as~~ the French Platform  
77 for epidemiological surveillance in animal health (Platform ESA) (7) and the European Centre  
78 for Disease Control (ECDC) (9).

79 Both HealthMap and PADI-web implement algorithms to capture news on potential disease  
80 outbreaks from a broad range of data sources on the web, in multiple languages and  
81 geographical regions (4,5). For example, HealthMap gathers data from Baidu, SoSo, Google  
82 News aggregators, and ProMED-mail in nine languages. PADI-web collects data from the  
83 Google News aggregator in ~~16~~~~sixteen~~ languages. Both tools, further implement classification  
84 and information extraction algorithms to filter and extract ~~the relevant outbreak information~~  
85 in a structured format ~~relevant outbreak information~~ from the free text, such as ~~the~~ place,  
86 date, and host of a described outbreak. Finally, HealthMap provides users with a world map  
87 interface to visualize the reports and information sources that report outbreaks. PADI-web  
88 ~~rather~~ provides users with a list of ~~the~~-information sources and ~~the~~-news content ~~that~~  
89 report~~sing~~ outbreaks.

90 Previous evaluations of the EBS tools in use today, including HealthMap and PADI-web,  
91 focused mainly on the assessment of their extrinsic performance, such as timeliness, positive

**Commented [EA2]:** The introduction has been reworked to account for reviewers comments and suggestions, including the use of EBS tools for health agencies, examples of users, and a more simple description of the EBS process in order to be understood by a larger audience of readers

92 predictive value, or sensitivity (Se) in detecting outbreaks from the sources they monitor,  
93 compared to ~~the~~ official disease outbreaks (6,7). From an end-user ~~perspective~~point of view,  
94 Barboza et al. (10,11) assessed metrics such as the usefulness, simplicity, and flexibility of an  
95 EBS tool.

96 The understanding of the role of the inputs (i.e. the monitored sources), ~~i.e., the monitored~~  
97 ~~sources~~, on the performances of ~~the~~ EBS tools is less explored. Barboza et al., 2014 (10) found  
98 that the type of moderation, sources, languages, regions of occurrence, and types of cases  
99 influence ~~an~~ EBS tool performance. Schwind et al. (2017), ~~2017~~ (12) ~~found identified that the~~  
100 domestic and, national news sources were more likely to report outbreaks than international  
101 news ~~portals~~portal sources.

102 This study aimed to fill ~~at filling~~ the existing gap in the role of ~~the~~ sources monitored by ~~the~~  
103 EBS tools. We consider ~~the~~ EBS tools as aggregators which collect disease outbreak  
104 information at the end of a transmission chain, referred to as a network. More precisely, we  
105 aimed to assess ~~at assessing where~~ characterise ~~does~~ the sources of outbreak information  
106 detected by ~~the an~~ EBS tool comes from, and assess how the sanitary information ~~it~~ circulates  
107 through the monitored sources before being detected by an EBS tool.

108 We assessed the flow of outbreak information from primary sources, providers of the  
109 information, until the end sources, ~~the~~ EBS tools, and final aggregators of the information.  
110 We represent ~~this~~these information flows through a network structure. Moreover, we provide  
111 an in-depth analysis of the extracted networks and the characteristics of the sources involved  
112 in outbreak reporting using ~~by~~ two EBS tools, HealthMap and PADI-web. In ~~More precisely, in~~  
113 this study, paper we address three main questions:

- 114 1. What are the sources involved in the reporting of outbreak-related information on  
115 the web?
- 116 2. What are ~~is~~ the roles of the different sources regarding the dissemination of outbreak-  
117 related information on the web, and what are their characteristics in terms of type,  
118 specialisation, and geographical scope?
- 119 3. How complementary are the different EBS tools in terms of monitored sources and  
120 reported outbreak-related information?

121 In this study, we further propose a new representation of the sources and their networks  
122 involved in digital disease surveillance, to improve the detection and analysis of signals of  
123 disease emergence from online media. This representation and associated analysis enable to  
124 addresses ~~these~~ ~~the above mentioned~~ questions.



125 ~~The remainder of this~~This paper is organised as follows. First, we summarise the objectives  
126 and methods ~~of assessing~~~~to assess the~~ information dissemination across ~~the~~ data (news)  
127 sources. Next, we detail our methodology to collect and assess the dissemination of outbreak-  
128 related information via PADI-web and HealthMap. We present and discuss our results in  
129 ~~S~~ection 3, before summarising the main conclusions of our work.

## 130 **Materials and methods**

### 131 **Data collection**

132 To conduct this study, we chose to analyse news reports of Avian Influenza (AI) detected by  
133 two EBS tools, PADI-web and HealthMap. ~~The~~ AI viruses can spread over long distances via  
134 trade in poultry and wild-caught birds, ~~but as well as~~ ~~as~~ via the movements of wild birds (13).  
135 ~~The~~ AI outbreaks are responsible ~~for~~ significant economic losses resulting from trade  
136 restrictions, loss ~~of the free~~ of disease-free status for ~~the~~ affected countries, or culling  
137 measures in infected flocks. Moreover, AI has ~~a~~ great zoonotic potential, as some subtypes  
138 can infect different avian and mammalian animal hosts, including humans (14). Thus, ~~the~~ early  
139 detection of AI outbreaks is essential for implementing protection and control measures and  
140 helping contain their spread.

141 For our study, we extracted all English news reports from PADI-web and HealthMap EBS tools,  
142 which described one or several AI outbreaks and ~~were~~ published between 1 July 2018 and 30  
143 June 2019 (i.e., 337 news ~~reports~~ from PADI-web and 115 news ~~reports~~ from HealthMap). We  
144 chose a one-year study period (July 2018 ~~to~~ June 2019) to capture the ~~spatiotemporal~~ ~~space-~~  
145 ~~time~~ epidemiological characteristics of ~~the~~ AI outbreaks ~~around the world~~ ~~wide~~. The detection  
146 of the virus at a specific date and time is hereafter referred to as an event (most ~~of~~ events are  
147 outbreaks, but some ~~of them~~ describe the detection of the virus in the environment). Two  
148 epidemiologists (BB, SV, authors of this work) manually assessed the relevance of each news  
149 ~~item~~ (a report ~~was being~~ considered ~~as~~ relevant if it contained ~~eds~~ at least one event) and  
150 discarded ~~the~~ irrelevant news. Importantly, the events can be either reported as confirmed or  
151 suspected, as one of the keystones of ~~E~~pidemic Intelligence is the detection of potential  
152 outbreaks ~~before their~~ official confirmation.

### 153 **Event detection**

154 Two epidemiologists (BB ~~and~~, SV, authors of this work) read the ~~retained~~ relevant news and  
155 identified all ~~the~~ reported events. ~~For each~~ event described in ~~the~~ detected news ~~was we~~  
156 classified ~~it~~ as official or non-official.

157 Official events corresponded to ~~outbreaks~~ officially notified ~~outbreaks~~ by AH authorities. For  
158 this purpose, we used the- Emergency Prevention System for Priority Animal and Plant Pests  
159 and Diseases (EMPRES-i), ~~a~~ global animal health information system (15,16) developed by the  
160 Food and Agriculture Organization (FAO) of the United Nations. EMPRES-i allows free access  
161 ~~to~~ and ~~sharing~~ of disease outbreak data to support data analysis and notification to national  
162 AH authorities by monitoring and summarizing the global status of priority animal diseases  
163 and zoonoses, including AI. One of the main sources of information for the EMPRES-i ~~is~~ the  
164 verified disease outbreak data, provided by national AH authorities, mainly through traditional  
165 disease surveillance ~~by~~ the World Organisation for Animal Health (WOAH). ~~The~~ EMPRES-i  
166 has ~~been~~ tracking AI outbreaks since 2003.

Commented [EA3]: The gold-standard dataset is better described as required by reviewers

167 When an event could not be linked to an official event from ~~the~~ EMPRES-i, we labelled it as  
168 non-official and recorded the epidemiological information provided in the report (i.e.,  
169 ~~serotypesubtype~~, reported date of the event, the country and location of the event, the host  
170 affected, and the number of cases). This enabled us to identify when ~~the~~ same non-official  
171 event was reported ~~in~~ by different news ~~articles~~.

172 For both official and non-official events, we calculated the number of non-overlapping events  
173 between the two ~~EBS~~ tools, ~~that is~~, the events that were detected by one tool out of two.

174 For ~~the~~ official events, we evaluated the ~~Sensitivity~~ and ~~the~~ timeliness of each tool.  
175 Timeliness is the lag in days between the date of official notification to the WOA (day 0), as  
176 recorded in the EMPRES-i database, and the date when the same event was first detected by  
177 ~~the~~ PADI-web and HealthMap. A negative lag means that the EBS tool ~~timely~~ detected  
178 an event ~~in a timely manner~~, ~~that is~~, before the date of notification. A positive lag indicated  
179 that the EBS tool was untimely ~~for~~ detecting an outbreak, ~~that is~~, ~~the~~ same day or after the  
180 official notification date. ~~Sensitivity (Se)~~ is defined as the ability of the EBS tool to report an  
181 event present in the EMPRES-i database, corresponding to the proportion of true positive  
182 events (TP) among the sum of true positive and false-negative (FN) events ( $Se = TP / (TP + FN)$ ).  
183 A ~~true positive (TP)~~ event was defined as all AI outbreaks ~~in~~ from the EMPRES-i database during  
184 the study period. A ~~false negative (FN)~~ event was defined as an event present in the EMPRES-  
185 i database ~~that was~~ not detected by an EBS tool. The specificity of event-based surveillance  
186 tools cannot be calculated, as it is impossible to assess the status of non-official events ~~they~~  
187 detected (11); there may be false positive events, as well as ~~TP true positive~~ events not  
188 reported to the gold standard databases (WOAH and EMPRES-i). -

## 189 Network construction

190  
191 ~~To~~In order to trace back ~~from the end to the~~ primary sources, we manually traced the  
192 information pathways of all events mentioned in the PADI-web and HealthMap news. We  
193 assumed that an information pathway could be deducted from the sources cited in ~~the~~ news  
194 content. In ~~the~~an information pathway, the first node is called the primary source (i.e., the  
195 earliest emitter source), the last node is called the final source (i.e., the final aggregator, PADI-  
196 web, or HealthMap), and the remaining nodes, if any, are called secondary sources. The  
197 combination of all ~~the~~ information pathways from ~~the~~ news events gives a network structure  
198 ~~in the end~~, referred to as a network of information pathways.

199 Let  $G = (V, E, A)$  be a directed unweighted attributed graph ~~to~~ representing a network of  
200 information pathways, where  $V$ ,  $E$ , and  $A$  ~~is~~ are the set of network nodes,  $E$  ~~is~~ the set of  
201 network edges, and  $A$  ~~is~~ the set of attributes associated with the nodes, ~~respectively~~ (17).  
202 The network nodes represent the sources and ~~the~~ final aggregators (PADI-~~ww~~web and  
203 HealthMap). Each node has three attributes, as defined in S1 Table: type (e.g., online news  
204 source, national veterinary authority, etc.), geographical focus (local, national, or  
205 international), and specialisation in ~~the~~ animal health news coverage (general or  
206 specialiszed). The edges represent the dissemination of event information between two nodes  
207 (an emitter source,  $S_E$ , ~~that~~which sends the event, and a receptor source,  $S_R$ , ~~that~~which  
208 receives the event). The graph is directed, as the information is transmitted from ~~the~~an  
209 emitter source  $S_E$  to ~~the~~ receptor sources,  $S_R$ . A directed graph is formally defined as a graph  
210  $G$  for which each edge in  $E$  has an ordering to its vertices (i.e., ~~such~~ that  $e_1 = (u, v)$  is distinct  
211 from  $e_2 = (v, u)$ , for  $e_1, e_2 \in E$ ). In our approach, the edges are not weighed, because we create  
212 an edge between an emitter  $S_E$  and receptor sources  $S_R$  if  $S_R$  cited  $S_E$  at least ~~once~~one time.

213 It is worth noticing that an event can be transmitted through several paths, and ~~that~~ a path  
214 can transmit several events. The first case ~~occurs~~happens when the same event is reported  
215 by different sources (e.g., ~~reported into~~ two online news articles). The second ~~case~~ occurs  
216 when a single news article reports several events. Based on this fact, we ~~could~~ separated the  
217 global graph into three subgraphs depending on the type of events detected and their  
218 timeliness: ~~at~~the graph containing the paths associated with the early detection of official  
219 events (timeliness  $< 0$ ), ~~at~~the graph containing the paths associated with the late detection of  
220 official events (timeliness  $\geq 0$ ), and ~~at~~the graph containing the paths associated with the  
221 detection of non-official events.

## 222 Network analysis

### 223 Network description

224 We first described the networks of information pathways extracted from the PADI-web and  
225 HealthMap news, PADI-web, and HealthMap networks hereafter, in terms of the number of  
226 edges, nodes, and paths. We visualized the networks using with a chord diagram and,  
227 classified classifying the nodes according to their source types.

### 228 Path analysis

229 To evaluate the network performances regarding the dissemination of health events, we  
230 calculated the paths length and the paths reactivity of the networks. The path length is  
231 the number of edges in the path. The path length corresponds to the number of secondary  
232 sources between the primary and the final aggregators (PADI-web or HealthMap); for  
233 example, e.g., a path composed of by three edges contains contain two secondary sources.  
234 We hypothesised that the fewer the number of sources in a path, the faster is the transmission  
235 of information was.

236 The path reactivity was the sum of the time lags between all the nodes composing the path.  
237 The path reactivity measured the number of days between the primary source's  
238 communication and the detection by the final aggregator. Path reactivity is  
239 highly tremendously relevant for EI, because as it reflects the ability of the system to quickly  
240 disseminate events to the aggregator.

### 241 Node analysis

242 We assessed the importance of the nodes, i.e., the sources, in the PADI-web and HealthMap  
243 networks using qualitative and quantitative attributes.

244 We first evaluated the global ability of the sources to receive and transmit event information  
245 by merging PADI-web and HealthMap networks. We calculated the in-degree, out-degree, and  
246 all-degree centrality measures of the nodes (18) and analysed their distribution according to by  
247 the types of sources. In-degree is the number of incoming edges to a node; thus, sources with  
248 a high in-degree collect information from a large range of other sources. Out-degree is the  
249 number of outgoing edges from a node. Sources with a high out-degree are sources that are  
250 often cited; thus, they are which able to can communicate outbreak-related information with  
251 high visibility. The all-degree is the sum of the in-degree and out-degree. Sources with a high  
252 all-degree, also referred to as "hubs", combine both the capacity to receive of receiving and  
253 sharing outbreak-related information (19).

254 We further analysed the role of the sources in the different subgraphs (early, late, and non-  
255 official), separating the PADI-web and HealthMap networks. We classified the sources ~~them~~  
256 according to their ~~location~~ place in the network (primary versus secondary) and calculated the  
257 frequency of each type of sources (e.g., online news, ~~etc.~~). We further calculated the  
258 proportion of primary and secondary sources according to their geographical focus and ~~their~~  
259 specialisation.

## 260 Software

261 The database was constructed using MS Office Access (version 2019). ~~The a~~Analysis was  
262 ~~performed~~ using the *igraph* package available in R version 3.6 (20).

## 263 Results

### 264 Event detection

265 Between 1<sup>st</sup> July 2018 and 30<sup>th</sup> June 2019, national animal health authorities reported 351 AI  
266 outbreaks ~~into~~ the WOA. Among these, 81% (284/351) ~~were from~~ outbreaks were in  
267 domestic birds, 10% (34/351) were ~~from~~ wild birds, 6% (24/351) were from environmental  
268 samples, and 3% (12/351) were ~~unspecified~~ not specified.

269 The PADI-web detected 408 unique AI outbreak-related news reports, 337 (83%) of  
270 ~~which~~ them were considered ~~as~~ relevant after manual curation (see details in S2 Table).  
271 HealthMap detected 163 unique AI outbreak-related news reports, 115 (71%) of ~~which~~ them  
272 ~~were~~ being relevant after manual curation. Among the relevant reports, 37 were detected  
273 ~~using~~ by both the EBS systems.

274 Both the PADI-web and HealthMap had a median of one event per news report (min=1,  
275 max=14). In the PADI-web relevant news reports, ~~a total of~~ 230 events were described,  
276 including 193 events that were not detected by HealthMap (Table 1). Among the detected  
277 events, 87% (199/230) were official events; ~~that is, they, i.e.,~~ matched a notified AI outbreak  
278 to the WOA. The remaining 31 events (13%) were unofficial, ~~that is, i.e.,~~ they could not be  
279 verified. The majority, ~~i.e., (82%) of PADI-web events~~, 82% of PADI-web events, described AI  
280 outbreaks in domestic birds (185/226), while AI outbreaks in wild birds represented 13%  
281 (29/226) of the events.

282 HealthMap relevant reports described 68 events, among which 31 did not overlap with PADI-  
283 web detected events (Table 1). Among these events, 88% (60/68) were official ~~events~~ and 12%  
284 (8/68) were non-official ~~events~~. Similar to the PADI-web, 78% (53/68) of the HealthMap  
285 events were in domestic birds, ~~whereas~~ while 16% (11/68) were in wild birds.

286 The non-overlapping events represented 45% (222/489) of all ~~the events~~ detected ~~events~~ by  
 287 PADI-web and HealthMap.

288 **Table 1. Number of official and non-official events of AI detected by PADI-web and**  
 289 **HealthMap between July 2018 and June 2019.** The number of non-overlapping events is  
 290 shown between parentheses.

| Type of host   | PADI-web  |              | HealthMap |              |
|----------------|-----------|--------------|-----------|--------------|
|                | Official  | Non-official | Official  | Non-official |
| Domestic birds | 174 (147) | 15 (13)      | 48 (23)   | 5 (3)        |
| Wild birds     | 16 (10)   | 13 (12)      | 9 (3)     | 2 (1)        |
| Mammals        | -         | 2 (1)        | -         | 1 (0)        |
| Environmental  | 8 (8)     | -            | 2 (0)     | -            |
| Unspecified    | 1 (1)     | 1 (1)        | 1 (1)     | -            |
| Total          | 199 (166) | 31 (27)      | 60 (27)   | 8 (4)        |

291

292 The ~~sensitivity~~ ~~Se~~ of HealthMap and PADI-web ~~were~~ ~~was~~ 17% (60/351) and 57% (199/351),  
 293 respectively. The numbers of events reported to the WOA and the events detected by the  
 294 two EBS tools per week and ~~per~~ ~~region~~ ~~are~~ ~~are~~ provided in [the S3 Table](#).

295 The timeliness of PADI-web varied from 112 days before, ~~up~~ to 39 days after a notification of  
 296 an outbreak to the WOA; 24% (47/199) of the events detected by PADI-web were detected  
 297 before their official notification, representing 13% of the official events (Fig 1). [The](#) PADI-web  
 298 was timelier in detecting AI events in wild birds ~~than in~~ ~~in comparison to~~ domestic birds. More  
 299 precisely, 21% (36/174) of the AI outbreaks in domestic birds [in the](#) PADI-web ~~were~~ detected  
 300 before their official notification, while 56% of the events (9/16) were detected early in wild  
 301 birds, with a maximum of 112 days before official notification in wild birds.

302 The timeliness of HealthMap varied from 46 days before, ~~up~~ to 66 days after an official  
 303 reporting of an event to the WOA; 43% (26/60) of the events detected by the tool were  
 304 reported before the official notification, representing 7% of the official events [\(Fig 1\)](#). In the  
 305 HealthMap network, 42% (20/48) and 56% (5/9) of AI outbreaks in domestic ~~birds~~ and ~~in~~ wild  
 306 birds, [respectively](#), were detected before their official notification, with a maximum of 43 days  
 307 before official notification in wild birds.

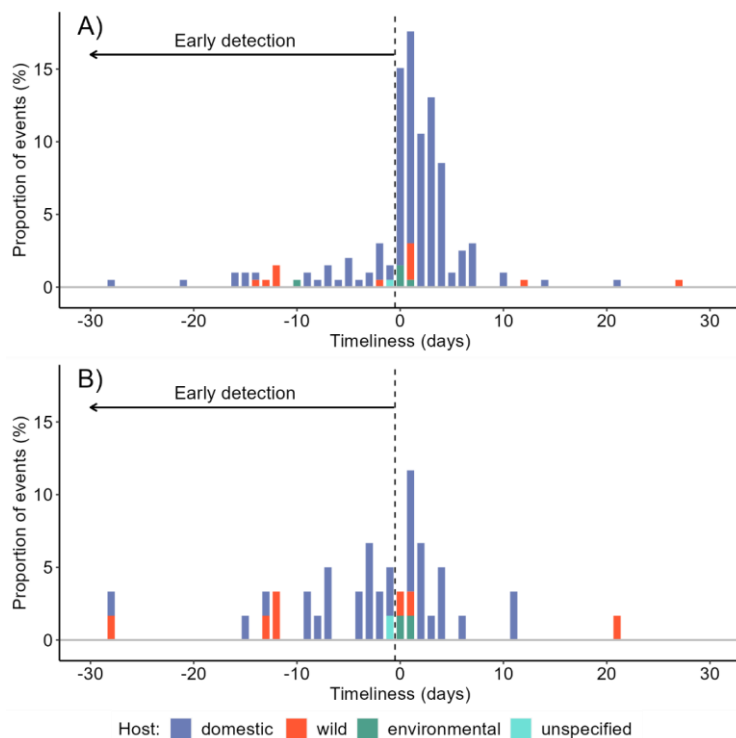

308

309 **Fig 1. Timeliness in the detection of AI outbreaks according to the type of host for A) PADI-**  
 310 **Web and B) HealthMap.** Y-axis represents the proportion of events compared to the total  
 311 **number of detected events by each EBS tool.** For visibility, extreme values i.e., less than 30  
 312 days and higher than 30 days are not shown.

313 **Network analysis**

314 **Network description**

315 1During the study period, the PADI-web network disseminated AI outbreak-related  
 316 information from 250 different nodes (i.e., sources), 446 unique edges (i.e. links), and 455  
 317 paths. The 2HealthMap network comprised was made up of 108 nodes, 150 unique edges, and  
 318 107 paths. A graphical representation of both networks, as well as detailsed of the edges and  
 319 nodes, are provided in S4-7 Tables and S1 Fig.

320 **Table 2. Types of sources (i.e., nodes) in PADI-web and HealthMap networks disseminating**  
 321 **outbreak-related news on Avian influenza between 1<sup>st</sup> July 2018 and 30<sup>th</sup> June 2019**

322

| Type of source             | PADI-web      | HealthMap     |
|----------------------------|---------------|---------------|
| online news source         | 47.6% (n=119) | 36.1% (n=39)  |
| national vet authority     | 14% (n=35)    | 20.4 % (n=22) |
| local veterinary authority | 13.2% (n=33)  | 8.3 % (n=9)   |

**Formatted:** No underline, Font color: Auto  
**Formatted:** Font: Bold

|                                    |             |              |
|------------------------------------|-------------|--------------|
| local official authority           | 6% (n=15)   | 3.7% (n=4)   |
| press agency                       | 4.8% (n=12) | 10.2% (n=11) |
| radio, TV                          | 4.4% (n=11) | 3.7% (n=4)   |
| laboratory                         | 2.4% (n=6)  | 2.8% (n=3)   |
| national official authority        | 2% (n=5)    | 5.6% (n=6)   |
| research organisation              | 1.6% (n=4)  | 1.9% (n=2)   |
| local person                       | 1.2% (n=3)  | 0            |
| social platform                    | 1.2% (n=3)  | 4.6% (n=5)   |
| private company                    | 0.8% (n=2)  | 0            |
| EBS tool                           | 0.4% (n=1)  | 1.9% (n=2)   |
| international veterinary authority | 0.4% (n=1)  | 0.9% (n=1)   |
| Total                              | 250         | 108          |

323

324 Online news ~~was~~ were the most represented ~~type of sources~~, (47.6% of the sources in the  
325 PADI-web network and, 36% in the HealthMap network (Table 2). -Local veterinary authorities  
326 were more frequent in the PADI-web network than in the HealthMap network. Conversely,  
327 press agencies represented 10.2% of the HealthMap network sources, compared to against  
328 4.8% in the PADI-web network.

### 329 Path analysis

330 Most of the PADI-web paths are composed of two (232/455; 51%) and three (182/455; 40%)  
331 edges, 4% (18/455) of the paths are composed of ~~a~~ one single edges (they do not cite any  
332 source), and 5% (21/455) of the paths are made up of four edges and more. Similarly, most ~~of~~  
333 ~~the~~ HealthMap paths are composed of two (53/107; 50%) and three (32/107; 30%) edges, 14%  
334 (15/107) of the paths are composed of one edge link, and 5% (7/107) are is composed of ~~five~~  
335 edges.

336 In the PADI-web, ~~the reactivity of~~ 83% (376/455) of the paths propagated events in ~~was~~  
337 one day (n=41) or less than ~~one~~ a day (n=335). Similar results were observed in HealthMap,  
338 with 94% (87/107) of the paths s propagating events s in one day (n=3) or less than ~~one~~ a day  
339 (n=84).

### 340 Quantitative node analysis

341 Only 24% (69/287) of the sources in the global network of the PADI-web and HealthMap were  
342 characterised by an in-degree greater than 1, indicating that most of the sources received  
343 information from a single source. The EBS tools, PADI-web and HealthMap, international  
344 veterinary authority, social platforms, press agencies, and research organisations had the  
345 highest median in-degrees (Fig 2).



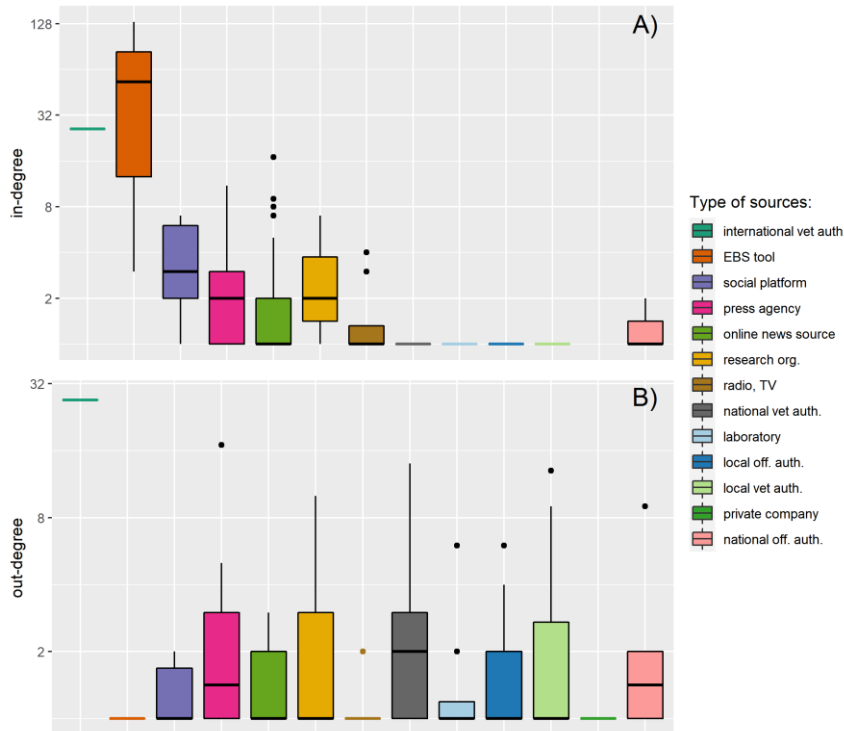

346

347 **Fig 2. Performance of sources in terms of A) in-degree and B) out-degree, aggregated by**  
 348 **type. The y-axis has been log-scaled. Distributions of in-degree and out-degree are**  
 349 **represented with box plots based on a 95% confidence interval (outliers are represented**  
 350 **with dots).**

**Formatted:** Left

351 These groups contain sources which have access to a large amount of information, ~~that is i.e.~~,  
 352 different sources.- ~~The~~ EBS tools had the highest median in-degree because they included  
 353 PADI-web and HealthMap, the two aggregators in our study. Except ~~for~~ these two EBS tools,  
 354 the WOAH stood out with ~~a~~the maximal in-degree, equal to 26.- Online news sources were  
 355 characteriszed by a median in-degree of one, but twelve outliers had an in-degree higher than  
 356 5, among which “Times of India”, and two sources specialiszed in poultry production,  
 357 “PoultrySite” and “WATTAgNet” (Table 2). Similarly, the social platforms, press agencies,  
 358 and research organisations were characteriszed by a high ~~variance~~intra-group variance,  
 359 containing highly connected sources (e.g., Reuters, Xinhua).

**Formatted:** Font: Bold, Font color: Text 2

360 The median out-degree of ~~nine~~9 out of the 13 types of sources was one, explained by the fact  
 361 that 64% (183/297) of the sources in the networks were cited only once. Local and national

362 veterinary authorities had higher out-degree values than in-degree values, highlighting their  
 363 role as emitter-sources of information.- Individually, the WOAH stands out with the maximal  
 364 out-degree (27), followed by Reuters, one national authority, and one local veterinary  
 365 authority (Table 2). As for in-degree, the out-degree variance was high in most groups,  
 366 owing to the presence of outliers being significantly better transmitters than the other  
 367 sources of their group.

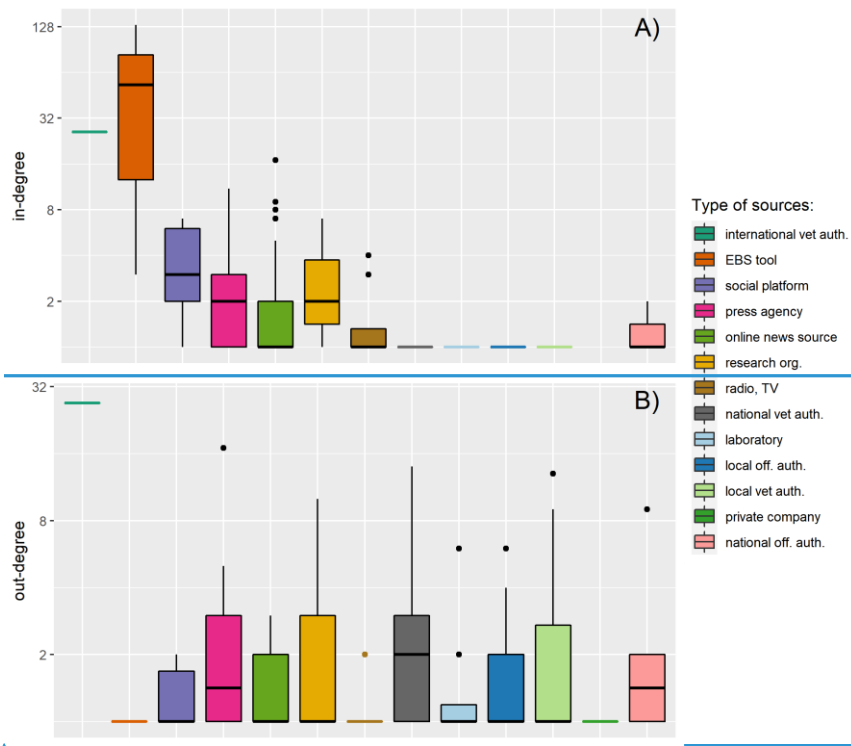

Formatted: Font: 11 pt

Formatted: Font: 11 pt

368 **Fig 2. Performance of sources in terms of A) in-degree and B) out-degree, aggregated by**  
 369 **type. The y-axis has been log-scaled. Distributions of in-degree and out-degree are**  
 370 **represented with box-plots based on a 95% confidence interval (outliers are represented**  
 371 **with dots).**

373 The WOAH was the best-performing source in terms of all-degrees, confirming its central  
 374 position. It was followed by two press agencies, Reuters and Xinhua, the veterinary authority  
 375 of Bulgaria, and an Indian online news, Time of India (Table 2).

Formatted: Font: 11 pt

376 **Table 2. Top-5 sources in terms of in-degree, out-degree and all-degree.** The EBS tools  
 377 PADI-web and HealthMap were excluded as they were chosen as the aggregators in our  
 378 study.

|                   | Source                                              | Value | Type                    |
|-------------------|-----------------------------------------------------|-------|-------------------------|
| <b>In-degree</b>  | WOAH                                                | 25    | International vet auth. |
|                   | Times of India                                      | 17    | Online news             |
|                   | Xinhua                                              | 11    | Press agency            |
|                   | The Poultry Site                                    | 9     | Online news             |
|                   | WATTAgNet                                           | 8     | Online news             |
| <b>Out-degree</b> | WOAH                                                | 26    | International vet auth. |
|                   | Reuters                                             | 17    | Press agency            |
|                   | Bulgaria Vet Auth                                   | 14    | National vet auth.      |
|                   | Minnesota Vet Authorities                           | 13    | Local vet auth.         |
|                   | USA National Oceanic and Atmospheric Administration | 10    | Research org.           |
| <b>All-degree</b> | WOAH                                                | 51    | International vet auth. |
|                   | Reuters                                             | 24    | Press agency            |
|                   | Times of India                                      | 20    | Online news             |
|                   | Bulgaria Vet Auth                                   | 15    | National vet auth.      |
|                   | Xinhua                                              | 14    | Press agency            |

379

#### 380 **Qualitative nodes analysis**

381 National veterinary authorities were the most frequent primary source of events in the late  
382 detection of events in both HealthMap and PADI-web (69% and 63% of the primary sources,  
383 respectively), and in the early detection of HealthMap events (42% of the secondary sources)  
384 (Figs 3 and 4; detailed numbers in S8-9 Tables). Local veterinary authorities were the most  
385 frequent primary source involved in the early detection of events by the PADI-web (44% of  
386 the primary sources), and the second most frequent in HealthMap. The transmission of events  
387 in the late detection context was mainly driven by WOA, press agencies, and online news for  
388 both the EBS tools. The transmission of events in the early detection context was mainly driven  
389 by online news sources (69% and 58% of the secondary sources in PADI-web and HealthMap,  
390 respectively), and press agencies were being less frequent than in the early detection  
391 networks.

392 Social platforms represented 13% of the secondary sources involved in the early detection by  
393 HealthMap, whereas while this type of source was barely used by the PADI-web.

394

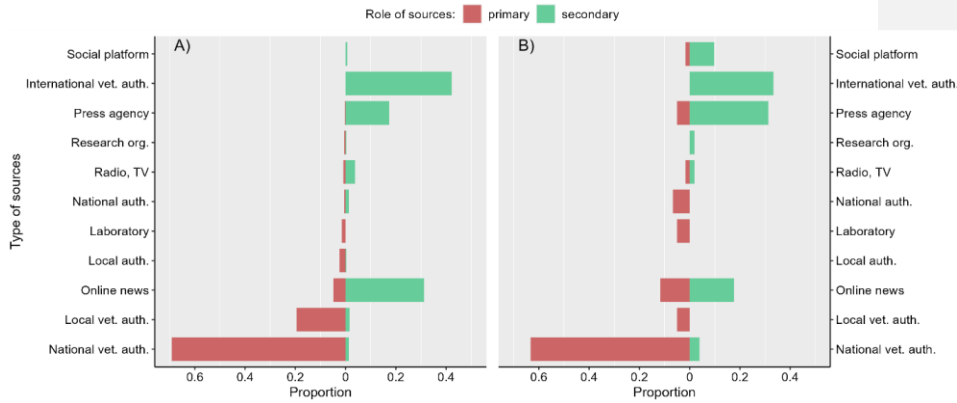

395

396 **Fig 3. Proportion of the types of primary and secondary sources according to their role in**  
397 **the (a) PADI-web and (b) HealthMap late detection networks.** Primary sources are sources  
398 that are the first to emit an event, secondary sources are sources which receive and emit an  
399 event to another source.

400

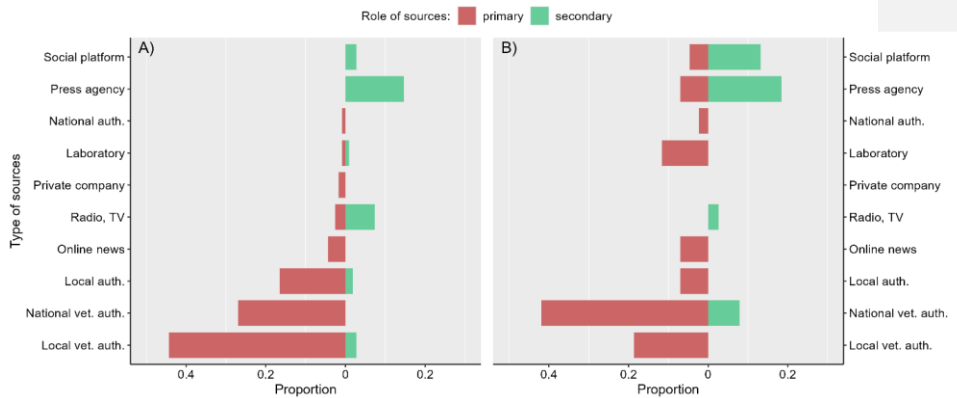

401

402

403 **Fig 4. Proportion of the types of primary and secondary sources according to their role in**  
404 **the (a) PADI-web and (b) HealthMap early detection network.** Primary sources are sources  
405 that are the first to emit an event, secondary sources are sources which receive and emit an  
406 event to another source

407

408

409

410

411

Nearly 75% of the primary sources in the early detection network of the PADI-web had a local geographical scope, in contrast opposite to 26% in HealthMap (Fig 5). This result was consistent with our previous results, highlighting the role of local sources in the early warning of disease outbreaks. The late detection networks mainly relied on sources with a national scope for both EBS tools, corresponding to the role of the national veterinary authorities.

412 Early detection networks relied on both national and international sources as intermediates,  
413 while late detection was mostly driven by international sources, as explained by the role of  
414 the WOAH in the official communication of events in the news.

415 ~~The~~ Specialization showed the same pattern between late and early detection and between  
416 the EBS tools, with at least 75% of the primary sources being specialized (S1 Fig).

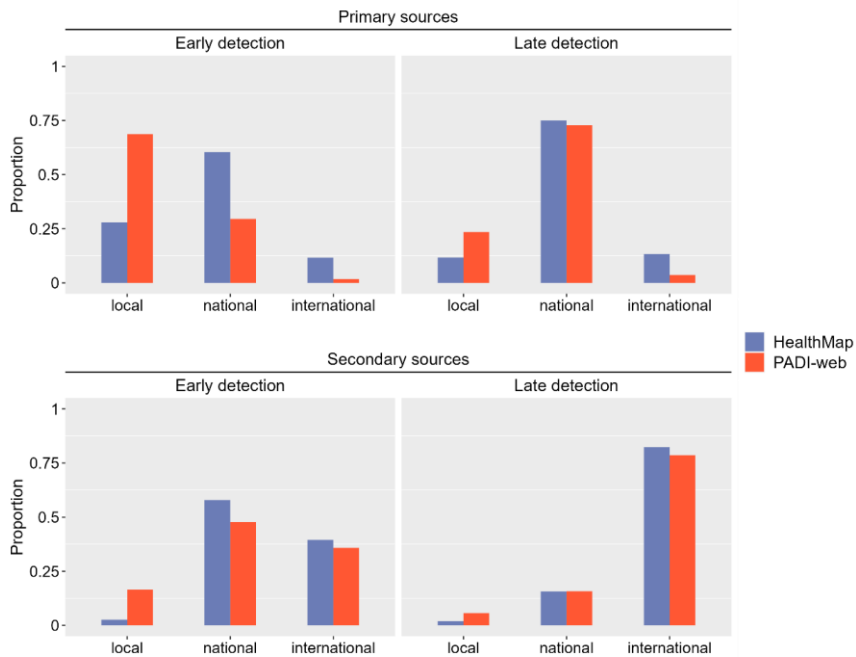

417

418 **Fig 5. Proportion of the geographic scope of primary and secondary sources in the PADI-**  
419 **web and HealthMap early and late detection networks.**

## 420 Discussion

421 In this work, we ~~have~~ described for the first time how outbreak-related information circulates  
422 in ~~the~~ news sources captured by two EBS tools, PADI-web and HealthMap. We assessed the  
423 EBS tools network, including primary and secondary sources, and their characteristics in terms  
424 of type, geographical scope, specialisation, and importance in the dissemination of  
425 information using network centrality metrics. In addition, we ~~have assessed these~~ the  
426 timeliness of officially sharing officially to share officially notified AI outbreak information.

## 427 Global performances of PADI-web and HealthMap networks

428 PADI-web and HealthMap, to ~~a~~-varying extents, capture false positive news reports (with  
429 respective report precision~~s~~ of 83% and 71%, respectively). Even if considered ~~as~~-irrelevant  
430 for ~~the purpose of~~ this study, most ~~of the~~ discarded news reports were related to AI events  
431 and contained contextual epidemiological information useful for risk assessment purposes,  
432 such as protective and control measures or global overviews of AI in a specific region. Both  
433 tools ~~were~~ prone to classifying human-related reports as animal-related events. When  
434 correctly identified, ~~the the~~ detection of zoonotic events in humans is highly relevant from a  
435 ~~One-h~~Health perspective. The automatic fine-grained topic classification of news reports still  
436 needs improvements to enable ~~discrimination~~discriminating of outbreak declarations from  
437 other topics, thus avoiding false alerts and facilitating the triage of sanitary information (21).

438 The PADI-web was more sensitive ~~than compared to~~ HealthMap. However, the proportion of  
439 early detected events compared to the total number of detected events was higher for  
440 HealthMap (43% ~~vs. versus~~ 23%). These differences in captured events may reflect the  
441 different web scraping and filtering methods for online news monitoring of ~~the~~ PADI-web and  
442 HealthMap. PADI-web is an entirely automatized tool; thus, it captures and filters outbreak-  
443 related information without any human intervention. HealthMap is a semi-automatised tool  
444 ~~with semi-automatized tool, it has~~ human moderators that filter ~~which~~ news reports ~~that~~ will  
445 be shared with users. ~~This~~ may suggest that HealthMap moderators filter and keep only  
446 emerging, exceptional AI events (such as primary cases), rather than all possible AI events  
447 (primary and secondary cases).

448 Our study highlightsed the complementarity of ~~these~~ two EBS tools. This complementarity  
449 reflects the different sources accessed through the EBS pipelines. Our results showed, for  
450 instance, that PADI-web captured more local sources than HealthMap, while the latter relied  
451 more heavily ~~relied~~ on social platforms such as Twitter. Barboza et al. (10) showed that the  
452 EBS tools characteristics such as the type of moderation, ~~the~~ sources accessed, diseases,  
453 languages, and regions covered significantly influence disease detection performance, and  
454 that the system's outbreak detection is synergic (complementary).- While the proportion  
455 of early detected events in our study may seem modest, it is ~~yet a~~-significant added ~~value of~~  
456 to the EBS regarding the reporting ~~of~~ outbreaks of pathogens with ~~a~~-zoonotic and pandemic  
457 potential.- In addition, both networks were highly reactive, mostly propagating ~~the~~  
458 information from primary sources to the aggregator in less than one day. Early detection of  
459 public health hazards constitutes a ~~first and~~ fundamental component of efficient outbreak

460 management (22). It may be the main determinant in selecting the appropriate response, ~~and~~  
461 thus minimizing ~~the~~ morbidity and mortality caused by an infectious disease (23). Event-  
462 based surveillance should not be considered a replacement for traditional indicator-based  
463 surveillance, but rather, complementary to routinely collected public health surveillance data.

464 While the reporting of AI events by the EBS tools was highly effective, timely, and reactive, a  
465 bottleneck may arise at the step of manual analysis of the detected events. The strength of  
466 EBS relies heavily ~~relies~~ on adequate human resources to feed decision-making chains based  
467 on detected events. Therefore, in our future work, we ~~will aim to~~ explore how the detected  
468 events can be useful for risk assessment and risk mapping.

### 469 **Role of the sources**

470 Our results highlighted three groups of sources regarding their role in the dissemination of  
471 outbreak-related information. ~~The~~ EBS tools ~~were~~ ~~the~~ aggregators. It is important to note  
472 that our results did not reflect ProMED-mail ~~Pro-MED~~ intrinsic performances as an EBS tool,  
473 ~~that is~~, expert network sharing ~~outbreak-outbreak~~-related information, but as an  
474 intermediate source of HealthMap. Local and national authorities ~~and~~,  
475 ~~veterinarians~~ ~~veterinary or not~~, were emitters ~~and~~, ~~were~~ ~~being~~ the most important primary  
476 sources of events. They produce ~~an~~-information that is acknowledged at the local/national  
477 level, mostly verified by laboratory tests, and is susceptible to being reported in the media.  
478 ~~The~~-WOAH, online news, press agencies, social media, and several research organisations  
479 combined both abilities by collecting information from a wide range of sources and being  
480 highly visible by collector sources in the network (online news, EBS tools). ~~The~~ ~~network~~  
481 performances ~~was~~ ~~were~~ driven by the presence of a small number of sources with high  
482 individual all-degrees, such as WOA, Reuters, ~~and~~ Xinhua, and several social network  
483 platforms. These sources played the role of hubs, not only filtering and disseminating  
484 information but also ensuring a connection between different groups in the network (19). The  
485 presence of hubs was not the only feature ~~of~~ ~~the~~ network performance, as ~~the~~ early detection  
486 mostly relied on online news sources with individual low all-degrees. Thus, the early  
487 components ~~of~~ ~~the~~ EBS networks also relied on their ability to monitor a large number of  
488 individually low-performant sources.

489 National online news played a major role in early detection by disseminating announcements  
490 from local and national veterinary authorities, thus making them detectible ~~detectable~~ by EBS  
491 tools. Zhang et al. found out that national newspapers (referred to as “local” newspapers in  
492 their methods) provided more specific information ~~of~~ ~~about~~ the local Zika virus emergence in

493 Brazil than ~~did~~ international newspapers-; similar findings were made for outbreak detection  
494 in Nepal (12). In ~~at the recent latest~~ study, local sources were more likely to identify a unique  
495 event than international sources, indicating ~~that~~ international sources were more likely to be  
496 redundant by publishing multiple reports about the same event (18). This emphasizes the  
497 need ~~to target of targeting~~ local and national sources available on the web, going beyond  
498 sources published in English. The monitoring of multi-lingual sources, integrated ~~into~~ the two  
499 EBS tools ~~in of~~ our work, is a prerequisite for maximizing ~~the~~ access to national and local  
500 media. The retrieval and analysis of non-English texts ~~have~~ been enhanced and facilitated by  
501 the improvement of methods for ~~in~~ multi-lingual texts processing, such as textual classification  
502 (25,26) and deep-learning-based translation (27). We believe that ~~pursuing efforts to in~~  
503 integrating multi-lingual sources will benefit ~~to both~~ ~~the~~ ~~Sesensitivity~~ and timeliness of EBS  
504 tools.

505 Social platforms, mostly used by HealthMap, included ~~ed~~ generic platforms, such as Twitter, but  
506 also specialized blogs such as FluTrackers and AvianFluDiary. Specialized blogs are relevant  
507 sources ~~for integration to integrate~~ into EBS, as they rely on the collection of information from  
508 numerous sources, as highlighted by their high median in-degree, previously filtered by  
509 domain-specialized moderators. Health blogs were found to cite less sources than online  
510 news in a study evaluating H1N1/Swine Flu coverage in the media (28), which is not in line  
511 with ~~the~~ highest in-degree found in our study. However, the difference in the number and  
512 nature of sources evaluated (~~eight~~ ~~in~~ online news ~~in~~ (28)) makes the study hardly  
513 comparable. They also translated news from national languages into English, facilitating ~~the~~  
514 access to local field information. ~~In addition Besides, owing thanks~~ to their non-official status,  
515 online blogs are more prone to communicate events before official notifications. While ~~the~~  
516 classical ~~method way~~ of web monitoring ~~was~~ traditionally keyword-oriented (e.g.e.g.,  
517 systematic monitoring of combinations of ~~keywords keywords~~), ~~the~~ source-based monitoring  
518 (~~i.e.i.e.~~, systematic monitoring of a specific source) ~~is would be a~~ costless and easy way to  
519 improve existing EBS tools. For instance, retrieving news directly from official government  
520 health websites would enhance ~~the~~ geographic representativeness of news aggregators such  
521 as Google News (29,30).

522 It is important to note that our results were specific to the model disease and ~~the~~ study period.  
523 For example, the Bulgarian veterinary authority appeared ~~to be as~~ an important source  
524 because 22 outbreaks were observed in Bulgaria during the study period, including a new  
525 incursion of the [Highly Pathogenic Avian Influenza \(HPAI\) H5N8 subtype](#) (31) widely reported  
526 by Bulgarian medias.

Commented [A4]: Dear author, the sentence was unclear to m. Do you mean, "the news retrieved directly from official government health websites would be released in the absence of the geographic representativeness of news aggregators such as Google News". Kindly clarify what you mean here so that I can revise.



## 527 Re-thinking the role of event-based surveillance in epidemic 528 intelligence

529 EBS is sometimes opposed to indicator-based surveillance, as it is based on the use of so-called  
530 non-official sources. In our study, official veterinary authorities (national or local) represented  
531 80% of ~~the~~ primary sources, including ~~those~~~~the~~~~ones~~ involved in early detection. Thus, the  
532 monitoring of ~~the~~ PADI-web and HealthMap was mainly character~~ized~~ by the detection of  
533 nationall~~y~~ or local~~ly~~ official events. This detection includes both the dissemination of WOA-  
534 notified outbreaks (late detection) and the dissemination of official events ~~that have~~ not yet  
535 ~~been~~ notified (early detection). In the latter case, EBS tools by-pass ~~the procedure of~~ the  
536 international notification ~~procedure~~ and its inherent delays. These findings are consistent with  
537 the latest and broader definitions of ~~the~~ EBS, stating that media sources collected in the  
538 context of EBS can be either official (e.g. a ~~M~~inistry of ~~H~~health website) or non-official (e.g.  
539 newspaper) (32).

540 ~~Although~~~~While~~ the extraction of epidemiological information from collected reports has been  
541 widely studied, the automatic extraction of ~~the~~ cited sources of events from online sources  
542 has not yet received attention. However, based on the findings of our study, we believe that  
543 this feature would enhance informal surveillance by enabling ~~the~~ character~~isation of~~ an  
544 event as official at the international, national, or local level, depending on ~~whether~~~~if~~ the cited  
545 source is the WOA~~H~~, or a national/local veterinary authority, or non-official, if the type of  
546 source does not belong to any of the latest categories. Recent advances in named entity~~ies~~  
547 extraction, involving deep learning, combined with a step of normalisation (dictionary or  
548 ontology-based), would enable ~~to~~ easil~~y~~ identif~~ication of~~ the mention~~ed of~~ the cited sources.  
549 Alerts could be triggered when ~~WOAH is not~~ mention~~ed~~ ~~to the~~ ~~WOAH is detected~~. By providing  
550 our corpus and databases ~~with~~ ~~an~~ ~~open~~ access, we offer the possibility ~~of~~ ~~evaluating~~~~to~~  
551 ~~evaluate~~ and compar~~ing~~ approaches with a high-quality validation dataset.

552 Both ~~the~~ EBS tools detected several events that could not be found in the EMPRES-i database  
553 (S10 Table). These events may have been local AI events that were not communicated at ~~the~~  
554 international level; thus, they ~~did~~ not appear in the EMPRES-i database. They may also  
555 correspond to a suspected event that was negated after a negative laboratory test results for  
556 ~~the~~ AI virus, or to a false alert, as mentioned in a previous ~~study~~~~work~~ (33). Thus, our study  
557 shows that EBS tools can be a source of relevant outbreak information, but should be  
558 ~~considered~~~~looked as~~ complementary to ~~the~~ official sources and interpreted with caution.- The  
559 identification and character~~ization~~ of the sources linked in ~~an~~ EBS ~~is~~~~are~~ important ~~for~~

560 ~~prioritising to prioritise~~ the ones regarding truthfulness and reliability. It may be a ~~way manner~~  
561 of dealing with fake news, ~~for example, by targeting specialised sources, by targeting sources~~  
562 ~~that are specialised, for example~~. Our study sets ~~the a~~ first list of these sources. By extending  
563 our approach to emerging zoonotic infectious diseases, ~~the these~~ corpora of reliable news  
564 sources may be enriched.

## 565 Conclusion

566 Current EBS tools use a diverse, but not identical, network of sources, thus, ~~they can't~~ be  
567 used in parallel by EI practitioners. In addition, both EBS tools should prioritise specialised  
568 media sources and access, when existing, to local and national veterinary authorities'  
569 webpages, as they released part of the official event before the international notification to  
570 the WOA. Outbreak-related news travels from a primary source to a final aggregator ~~for in~~  
571 one day or less, which is ~~of importance~~ ~~for~~ early warnings and ~~E~~epidemic intelligence.  
572 Both, PADI-web and HealthMap shared timely outbreak information on AI in domestic and  
573 wild birds, thus contributing ~~towards~~ the early detection ~~aspect of~~ ~~E~~epidemic intelligence and  
574 as complementary sources to traditional surveillance.

575 A potential future work could be the integration of the results highlight~~ed~~ing in this study ~~in~~  
576 ~~order~~ to improve EBS systems (for instance, by weighting type of sources in EBS platforms).  
577 As mentioned in this paper, we can cite multi-lingual aspects to consider for improving the  
578 proposed analysis ~~as well as but also the~~ EBS systems. We could evoke the same type of  
579 analysis to conduct with other platforms as well, ~~such as for instance~~ ProMED-mail.

## 580 Acknowledgements

581 We thank the HealthMap project (<https://healthmap.org/>), ~~whic~~he kindly provided us with  
582 their data. We acknowledge the review~~er~~s for their constructive comments.

## 583 Data reporting

584 The data used for this study is available at:  
585 <https://doi.org/10.5281/zenodo.7324144>

## 586 Statistical reporting

587 The code used for the analysis and figures is available at:  
588 <https://github.com/SarahVal/EBS-network>.  
589

## 590 Author Contributions

591 **Sarah Valentin:** [eC](#)Conceptualization, [mM](#)Methodology, [dD](#)Data [eC](#)Curation, [fF](#)Formal  
592 [aA](#)Analysis, [vV](#)Validation, [wW](#)Writing – Original Draft Preparation, Writing – Review & Editing  
593 **Bahdja Boudoua:** Data Curation, Formal Analysis, Writing – Original Draft Preparation,  
594 Writing – Review & Editing  
595 **Kara Sewalk:** Data Curation, Writing – Review & Editing  
596 **Nejat Arinik:** Visualization, Writing – Review & Editing  
597 **Mathieu Roche:** Conceptualization, Supervision, Resources, Writing – Review & Editing  
598 **Renaud Lancelot:** Conceptualization, Supervision, Resources, Writing – Review & Editing  
599 **Elena Arsevska:** Conceptualization, Methodology, Data Curation, Writing – Original Draft  
600 Preparation, Writing – Review & Editing

## 601 Supporting information

602 **S1 Table. Definitions used to characterize the types of sources, specialization and**  
603 **geographical focus in PADI-web and HealthMap networks.**

604 **S2 Table. Summary of the manual curation of the relevance of PADI-web and HealthMap**  
605 **reports.**

606 **S3 Table. The number of events reported to the WOA and detected by the two EBS**  
607 **tools per week (mean, min, and max) and per region.**

608 **S1 Fig. PADI-web (A) and Healthmap (B) networks.** Sources were grouped by type. The edge  
609 colour corresponds to the colour of the incoming source type, thus enabling the visualisation  
610 of the direction of information dissemination, that is, orange edges represent incoming edges  
611 to an EBS tool.

612 **S4 Table. Legend of the node's names in [the](#) PADI-web network.**

613 **S5 Table. Legend of the node's names in [the](#) HealthMap network.**

614 **S6 Table. PADI-web network composition.**

615 **S7 Table. HealthMap network composition.**

616 **S8 Table. Proportion of the types of sources according to their role in the (a) PADI-web and**  
617 **(b) HealthMap late detection networks.**

618 **S9 Table. Proportion of the types of sources according to their role in the (a) PADI-web and**  
619 **(b) HealthMap early detection networks.**

620 **S2 Fig. Type of specialization of primary and secondary sources for the detection of early**  
621 **and late events in PADI-web and HealthMap networks**

622 **S10 Table. Type of primary and secondary sources involved in the detection and**  
623 **transmission of non-official events in PADI-web and HealthMap networks.**

## 624 **References**

- 625  
626 1. Paquet C, Coulombier D, Kaiser R, Ciotti M. Epidemic intelligence: a new framework for  
627 strengthening disease surveillance in Europe. *Eurosurveillance*. 1 déc 2006;11(12):5- 6.
- 628 2. Wilburn J, O'Connor C, Walsh AL, Morgan D. Identifying potential emerging threats  
629 through epidemic intelligence activities—looking for the needle in the haystack?  
630 *International Journal of Infectious Diseases*. 1 déc 2019;89:146- 53.
- 631 3. Kaiser R, Coulombier D, Baldari M, Morgan D, Paquet C. What is epidemic intelligence,  
632 and how is it being improved in Europe? *Weekly releases (1997–2007)*. 2 févr  
633 2006;11(5):2892.
- 634 4. Freifeld CC, Mandl KD, Reis BY, Brownstein JS. HealthMap: Global Infectious Disease  
635 Monitoring through Automated Classification and Visualization of Internet Media  
636 Reports. *Journal of the American Medical Informatics Association*. 1 mars  
637 2008;15(2):150- 7.
- 638 5. Valentin S, Arsevska E, Falala S, de Goër J, Lancelot R, Mercier A, et al. PADI-web: A  
639 multilingual event-based surveillance system for monitoring animal infectious diseases.  
640 *Computers and Electronics in Agriculture*. 1 févr 2020;169:105163.
- 641 6. Bhatia S, Lassmann B, Cohn E, Desai AN, Carrion M, Kraemer MUG, et al. Using digital  
642 surveillance tools for near real-time mapping of the risk of infectious disease spread. *npj*  
643 *Digital Medicine*. 16 avr 2021;4(1):1- 10.
- 644 7. Arsevska E, Valentin S, Rabatel J, Hervé J de G de, Falala S, Lancelot R, et al. Web  
645 monitoring of emerging animal infectious diseases integrated in the French Animal  
646 Health Epidemic Intelligence System. *PLOS ONE*. août 2018;13(8):e0199960.
- 647 8. Valentin S, Mercier A, Lancelot R, Roche M, Arsevska E. Monitoring online media reports  
648 for early detection of unknown diseases: insight from a retrospective study of COVID-19  
649 emergence. *Transboundary and Emerging Diseases* [Internet]. 19 juill 2020 [cité 28 juill  
650 2020]; Disponible sur: <https://onlinelibrary.wiley.com/doi/abs/10.1111/tbed.13738>
- 651 9. Plateforme ESA [Internet]. [cité 1 nov 2022]. Disponible sur: <https://plateforme-esa.fr/fr>
- 652 10. Barboza P, Vaillant L, Le Strat Y, Hartley DM, Nelson NP, Mawudeku A, et al. Factors  
653 influencing performance of internet-based biosurveillance systems used in epidemic  
654 intelligence for early detection of infectious diseases outbreaks. *PLoS ONE*. 5 mars  
655 2014;9(3):e90536.
- 656 11. Barboza P, Vaillant L, Mawudeku A, Nelson NP, Hartley DM, Madoff LC, et al. Evaluation  
657 of epidemic intelligence systems integrated in the Early Alerting and Reporting project  
658 for the detection of A/H5N1 influenza events. Nishiura H, éditeur. *PLoS ONE*. 5 mars  
659 2013;8(3):e57252.

- 660 12. Schwind JS, Norman SA, Karmacharya D, Wolking DJ, Dixit SM, Rajbhandari RM, et al.  
661 Online surveillance of media health event reporting in Nepal: digital disease detection  
662 from a One Health perspective. *BMC International Health and Human Rights*. 21 sept  
663 2017;17(1):26.
- 664 13. Xu Y, Gong P, Wielstra B, Si Y. Southward autumn migration of waterfowl facilitates  
665 cross-continental transmission of the highly pathogenic avian influenza H5N1 virus. *Sci*  
666 *Rep*. 10 août 2016;6(1):30262.
- 667 14. Mostafa A, Abdelwhab EM, Mettenleiter TC, Pleschka S. Zoonotic Potential of Influenza  
668 A Viruses: A Comprehensive Overview. *Viruses*. 13 sept 2018;10(9):497.
- 669 15. Welte VR, Terán MV. Emergency Prevention System (EMPRES) for Transboundary  
670 Animal and Plant Pests and Diseases. The EMPRES-Livestock: An FAO Initiative. *Annals of*  
671 *the New York Academy of Sciences*. 2004;1026(1):19- 31.
- 672 16. Farnsworth ML, Hamilton-West C, Fitchett S, Newman SH, de La Rocque S, De Simone L,  
673 et al. Comparing national and global data collection systems for reporting, outbreaks of  
674 H5N1 HPAI. *Preventive Veterinary Medicine*. 1 juill 2010;95(3):175- 85.
- 675 17. Kolaczyk ED. *Statistical Analysis of Network Data: Methods and Models*. 1st éd. Springer  
676 Publishing Company, Incorporated; 2009.
- 677 18. Kolaczyk ED. Descriptive Analysis of Network Graph Characteristics. In: Kolaczyk ED,  
678 éditeur. *Statistical Analysis of Network Data: Methods and Models*. New York, NY:  
679 Springer; 2009. p. 1- 44. (Springer Series in Statistics).
- 680 19. Weber MS, Monge P. The Flow of Digital News in a Network of Sources, Authorities, and  
681 Hubs. *Journal of Communication*. déc 2011;61(6):1062- 81.
- 682 20. Csardi G, Nepusz T. The igraph software package for complex network research.  
683 *InterJournal*. 2006;Complex Systems:1695.
- 684 21. Valentin S, Arsevska E, Vilain A, De Waele V, Lancelot R, Roche M. Elaboration of a new  
685 framework for fine-grained epidemiological annotation. *Scientific Data*. 26 oct  
686 2022;9(1):655.
- 687 22. Adini B, Singer SR, Ringel R, Dickmann P. Earlier detection of public health risks – Health  
688 policy lessons for better compliance with the International Health Regulations (IHR  
689 2005): Insights from low-, mid- and high-income countries. *Health Policy*. oct  
690 2019;123(10):941- 6.
- 691 23. Yan SJ, Chughtai AA, Macintyre CR. Utility and potential of rapid epidemic intelligence  
692 from internet-based sources. *International Journal of Infectious Diseases*. 1 oct  
693 2017;63:77- 87.
- 694 24. Yoon S, Odlum M, Broadwell P, Davis N, Cho H, Deng N, et al. Application of Social  
695 Network Analysis of COVID-19 Related Tweets Mentioning Cannabis and Opioids to Gain  
696 Insights for Drug Abuse Research. *Stud Health Technol Inform*. 26 juin 2020;272:5- 8.
- 697 25. Mutuvi S, Boros E, Doucet A, Jatowt A, Lejeune G, Odeo M. Multilingual Epidemiological  
698 Text Classification: A Comparative Study. In: *Proceedings of the 28th International*  
699 *Conference on Computational Linguistics [Internet]*. Barcelona, Spain (Online):

- 700 International Committee on Computational Linguistics; 2020. p. 6172 - 83. Disponible  
701 sur: <https://aclanthology.org/2020.coling-main.543>
- 702 26. Névél A, Dalianis H, Velupillai S, Savova G, Zweigenbaum P. Clinical Natural Language  
703 Processing in languages other than English: opportunities and challenges. *Journal of*  
704 *Biomedical Semantics*. 30 mars 2018;9(1):12.
- 705 27. Singh SP, Kumar A, Darbari H, Singh L, Rastogi A, Jain S. Machine translation using deep  
706 learning: An overview. In: 2017 International Conference on Computer, Communications  
707 and Electronics (Comptelix). 2017. p. 162- 7.
- 708 28. Gao F, Zhang M, Sadri S. Newspapers Use More Sources Compared to Health Blogs in  
709 H1N1/Swine Flu Coverage. *Newspaper Research Journal*. 1 mars 2011;32(2):89- 96.
- 710 29. Feldman J, Thomas-Bachli A, Forsyth J, Patel ZH, Khan K. Development of a global  
711 infectious disease activity database using natural language processing, machine  
712 learning, and human expertise. *J Am Med Inform Assoc*. 30 juill 2019;26(11):1355- 9.
- 713 30. Zhang Y, Ibaraki M, Schwartz FW. Disease surveillance using online news: Dengue and  
714 zika in tropical countries. *J Biomed Inform*. févr 2020;102:103374.
- 715 31. Zecchin B, Goujgoulova G, Monne I, Salviato A, Schivo A, Slavcheva I, et al. Evolutionary  
716 Dynamics of H5 Highly Pathogenic Avian Influenza Viruses (Clade 2.3.4.4B) Circulating in  
717 Bulgaria in 2019–2021. *Viruses*. oct 2021;13(10):2086.
- 718 32. Tu W, Jin L, Ni D. Early Warning Practice Using Internet-Based Data. *Early Warning for*  
719 *Infectious Disease Outbreak*. 2017;231- 41.
- 720 33. Barboza P. Evaluation of epidemiological intelligence systems applied to the early  
721 detection of infectious diseases worldwide. 2015;122.
- 722

November 16, 2022

Subject: Response to the review of manuscript number PONE-D-22-24102

Dear PlosOne Chief Editor and Reviewers,

We acknowledge your comments on our manuscript "Dissemination of information in event-based surveillance, a case study of Avian Influenza". We addressed your constructive reviews by modifying our manuscript (using track changes) and answering the reviewers' questions here-below.

Best regards,  
The authors

## General comments from the editor

If applicable, we recommend that you deposit your laboratory protocols in protocols.io to enhance the reproducibility of your results. Protocols.io assigns your protocol its own identifier (DOI) so that it can be cited independently in the future. For instructions see: <https://journals.plos.org/plosone/s/submission-guidelines#loc-laboratory-protocols>.

1. Please ensure that your manuscript meets PLOS ONE's style requirements, including those for file naming. The PLOS ONE style templates can be found at :

- [https://journals.plos.org/plosone/s/file?id=wjVg/PLoSOne\\_formatting\\_sample\\_main\\_body.pdf](https://journals.plos.org/plosone/s/file?id=wjVg/PLoSOne_formatting_sample_main_body.pdf), and
- [https://journals.plos.org/plosone/s/file?id=ba62/PLoSOne\\_formatting\\_sample\\_title\\_authors\\_affiliations.pdf](https://journals.plos.org/plosone/s/file?id=ba62/PLoSOne_formatting_sample_title_authors_affiliations.pdf)

- Author affiliations formatting. We have added the appropriate pilcrow symbol for the equal contributors of the work. We have set the appropriate format for the corresponding author. We have fixed the affiliations, by removing postcodes and removing abbreviations of Departments and listing all institutions in full. Please check page 1 of the manuscript.

- Manuscript body formatting. We have adjusted level 1 heading for all major sections. File formats for figures were corrected, now they are in .tiff format and passed via the PACE tool suggested by PlosOne.

2. We note that the grant information you provided in the 'Funding Information' and 'Financial Disclosure' sections do not match. When you resubmit, please ensure that you provide the correct grant numbers for the awards you received for your study in the 'Funding Information' section.

- Done. Funding from Acknowledgments section has been removed and moved into the 'Funding Infor-

mation’ and ‘Financial Disclosure’ sections. Please see the new Acknowledgments section in line 546.

3. Thank you for stating the following in the Acknowledgments Section of your manuscript: ”This work has been funded by the “Monitoring outbreak events for disease surveillance in a data science context” (MOOD) project from the European Union’s Horizon 2020 research and innovation program under grant agreement No. 874850 (<https://mood-h2020.eu/>) and is catalogued as MOOD 049.”

We note that you have provided funding information that is not currently declared in your Funding Statement. However, funding information should not appear in the Acknowledgments section or other areas of your manuscript. We will only publish funding information present in the Funding Statement section of the online submission form.

Please remove any funding-related text from the manuscript and let us know how you would like to update your Funding Statement. Currently, your Funding Statement reads as follows: ”The funders had no role in study design, data collection and analysis, decision to publish, or preparation of the manuscript.” Please include your amended statements within your cover letter; we will change the online submission form on your behalf.

- Done. Funding from Acknowledgments section has been removed and moved into the ‘Funding Information’ and ‘Financial Disclosure’ sections.

- Please continue to use the current Funding Statement: ”The funders had no role in study design, data collection and analysis, decision to publish, or preparation of the manuscript.”

4. In your Data Availability statement, you have not specified where the minimal data set underlying the results described in your manuscript can be found. PLOS defines a study’s minimal data set as the underlying data used to reach the conclusions drawn in the manuscript and any additional data required to replicate the reported study findings in their entirety. All PLOS journals require that the minimal data set be made fully available. For more information about our data policy, please see <http://journals.plos.org/plosone/s/data-availability>. Upon re-submitting your revised manuscript, please upload your study’s minimal underlying data set as either Supporting Information files or to a stable, public repository and include the relevant URLs, DOIs, or accession numbers within your revised cover letter. For a list of acceptable repositories, please see <http://journals.plos.org/plosone/s/data-availability#loc-recommended-repositories>. Any potentially identifying patient information must be fully anonymized.

- We created a Zenodo repository (<https://doi.org/10.5281/zenodo.7324144>) containing the entire dataset to reproduce the results. We provided the link in the manuscript, section Data reporting, line 549.

- We also shared the script for our results presented in the manuscript in a public GitHub repository (<https://github.com/SarahVal/EBS-network>). We provided the link in the manuscript, section Statistical reporting, line 552.



- Our dataset does not contain patient information.

Important: If there are ethical or legal restrictions to sharing your data publicly, please explain these restrictions in detail. Please see our guidelines for more information on what we consider unacceptable restrictions to publicly sharing data: <http://journals.plos.org/plosone/s/data-availability#loc-unacceptable-data-access-restrictions>. Note that it is not acceptable for the authors to be the sole named individuals responsible for ensuring data access. We will update your Data Availability statement to reflect the information you provide in your cover letter.

- There are no legal and ethical restrictions for sharing our dataset publicly. Please check the description of our dataset at: <https://doi.org/10.5281/zenodo.6908000>

5. Please upload a new copy of Figure 3 as the detail is not clear. Please follow the link for more information: <https://blogs.plos.org/plos/2019/06/looking-good-tips-for-creating-your-plos-figures-graphics/>

- All figures have passed through the PACE web-based imaging review tool. We provide you with new figure publication graphics in a .tiff format, uploaded separately. For clarity, we have moved Figure 3 into Supp material.

## Comments from reviewer 1

*Line 35: Please write what WOAHA means.*

- Done, we defined World Organisation for Animal Health (WOAH, founded as OIE), line 159. We further checked for all other acronyms and their first mention full description.

*Line 165: there's a N starting the sentence (also in lines 276 and 278 that are starting with numbers). Please check*

- Removed in line 165, it was a typing error. However, we did not find typos for numbers for lines 276 & 278.

*Within the results section, what do authors mean by unique events in Table 1?*

- A unique event, non-overlapping event, as initially defined in our manuscript, was an event detected by either of the event-based surveillance (EBS) tools, PADI-web or HealthMap. More precisely, a unique event was an event detected by PADI-web (or by HealthMap, respectively) and not detected by HealthMap (or by PADI-web, respectively). To avoid confusion, we replace the term "unique" by "non-overlapping". Non-overlapping events enable us to analyse the overlap (and, thus, the complementary) between HealthMap and PADI-web. We provide an improved description of the term "unique event" in the manuscript in the section Material and methods, section Event detection line 166 and in the Results, section Event detection lines 266-271.

*Figure 3 is impossible to read. Could the authors improve the image quality?*

- All figures have passed through the PACE web-based imaging review tool. We provide you with new figure publication graphics in a .tiff format, uploaded separately. For clarity, we have moved Figure 3 into Supp material.

## Comments from reviewer 2

### Introduction

*First paragraph: The manuscript refers to communication in health surveillance and how it can be expanded in the case of avian influenza. Which bibliographic reference of the world health organization that guides or suggests the use of the dissemination of information on health-related events?*

- We added references to the Epidemic Intelligence paradigm, which promotes the use of non-official sources to follow the dissemination of information on health-related events and complement indicator-based surveillance. We have in detail reworked the introduction, please check pages 3 and 4.

*What context do these Padi-web and HealthMap applications work in? The first paragraphs do not mention health surveillance and its emergencies where these programs/applications can be useful.*

- PADI-web and HealthMap facilitate the collection, analysis and dissemination of event-based surveillance data on infectious diseases and associated health issues, in the context of epidemic intelligence. Several studies have assessed their use and performances in different epidemiological contexts including new and enzootic, epizootic and zoonotic infectious diseases. We provide example and new references in the manuscript. We have in detail reworked the introduction, please check pages 3 and 4.

*Second paragraph: it is not clear and explanatory all the advantages of using healthy maps descriptors. It must be in simple and clear computational language, after all, the target audience is not only the scientific community, but health workers.*

We specified the audience and simplified the description of both tools in the manuscript. We have in detail reworked the introduction, please check pages 3 and 4.

*-Seventh paragraph, last line: What is your source of comparison in relation to the healthy map data? what is the assumption or hypothesis that it can be more useful ?*

- In the seventh paragraph, we refer to a former study that evaluated the role of the sources detected by HealthMap regarding the detection of outbreaks, at a national scale (Nepal). The gold standard database with which the authors compared HealthMap was the official country outbreak notifications. We motivate our study as an extension of this work, by providing two significant enhancements: (1) we enlarge this work on a global scale and (2) we do not solely rely on the sources directly detected by the EBS tools, but we trace back the origin of the outbreak information. We have in detail reworked the introduction, please check pages 3 and 4.

### Regarding the questions of this work

1. *What are the sources involved in the reporting of outbreak-related information on the web?— This would not be a question but a methodology to evaluate.*

- Every EBS media monitoring tool in use today has its own methodology for detection of sources on the web, collection, filtering of news and extraction of relevant information from the unstructured text from the news. The sources detected by an EBS tool result from (1) the choice of targeting a specific source (e.g. HealthMap collect Pro-MED alerts) and (2) its methodological choices (e.g. keywords to capture the news, languages for the keywords, Google news regions to monitor, etc.). In the last case, the specific online news that will be captured cannot be know *a priori*. In our work, we do not solely evaluate the sources directly detected by the EBS tools, but, we also trace back and characterise the initial sources first emitting the disease outbreak information (referred to as primary sources in our manuscript) and the intermediate ones, based on the manual evaluation of all sources cited in each news, which was a fastidious work of data collection and curation for the co-authors. We provide a clarification on this objective in the introduction.

3. *How complementary are the different EBS tools in terms of monitored sources and reported outbreak-related information?—Is it compared to which data?*

We address this question in two steps. First, we calculate the proportion of overlapping events (events that were detected by both PADI-web and HealthMap), We show that almost half of the detected events were non-overlapping events. Second, we show that the two tools do not monitor the same sources (i.e. PADI-web retrieved a largest number of online news sources, while HealthMap retrieved content from more social platforms than PADI-web). Please check, the Event detection section in Methods, lines 151-167 and in Results, lines 251-271.

## Methodology

### Event detection

*First paragraph: We chose a one-year 131 study period (July 2018 - June 2019) to capture the space-time epidemiological characteristics of the AI outbreaks around the world.—¿ From which agencies?What sources?*

The official data source is described further in our manuscript (Empres-i). Here, we meant that we wanted to embrace a time period enabling us to capture different epizootic events worldwide, to be able to compare the EBS tools and evaluate the network of sources based on a large number of AI outbreaks. Please check lines 151-165.

- We provide a new sentence in the Methods section: "We chose a one-year study period (July 2018 - June 2019) to capture larger scale AI outbreak patterns around the world." Please check lines 128-135.

*Define about Empres-i - How it collects health data from official sources?*

- We provide a more clear description of the EMPRES-i database, its purpose and its sources. Please

check the Event detection of the Materials and methods section, lines 151-165..

*Second paragraph line 145, define what this acronym WOAHA means. From this description you can mention only the acronym but not have defined yourself previously*

- Done, we provide the full name of the World Organisation for Animal Health (WOAH, ex-OIE). Please check line 159.

### **Network construction**

*First paragraph “We assumed that an information pathway could be deducted from the sources cited in a news content. In an information pathway, the first node is called the primary source (i.e. the earliest emitter source), the last node is called the final source (i.e. the final aggregator, PADI-web or HealthMap) and the remaining nodes, if any, are called secondary sources.” Comment: It is necessary to modify this definition because primary data in public health and epidemiology are those obtained directly in the territory to be sampled regarding a certain disease data. A secondary data are obtained through the country’s information systems.*

Epidemic intelligence (EI) encompasses all activities related to early identification of potential health hazards, their verification, assessment and investigation in order to recommend public health control measures. EI integrates both an indicator-based and an event-based component. ‘Indicator-based component’ refers to structured data collected through routine surveillance systems, corresponding to the definitions provided by the reviewer. ‘Event-based component’, the context of our study, refers to unstructured data gathered from sources of intelligence of any nature (e.g. media, laboratory, channels of communications, etc., see <https://www.eurosurveillance.org/content/10.2807/esm.11.12.00665-en>). As noted by the reviewer, the primary sources in terms of diagnosis is usually a laboratory, even in EBS, especially when studying a well-known disease subject to notification as avian influenza. However, this is not true when the detected disease is not yet diagnosed and when solely information about unusual symptoms are communicated. This component of EBS, which is closed to the syndromic surveillance, is an essential component of early detection. In this study, we defined primary sources in EBS paradigm as the earliest cited source of each path, which is not necessarily the primary source in terms of diagnosis, but rather in terms of communication. Thus, it can include official sources typically involved in IBS (laboratory, country’s official authorities), as well as informal sources (a person, an company, etc.). We have reworked the introduction, please check pages 3 and 4.

*No reference to the global surveillance system by a specific WHO program was cited or used (<https://www.who.int/initiatives/global-influenza-surveillance-and-response-system> and <https://www.who.int/health-topics/influenza-avian-and-other-zoonotic>) Why?*

Our study lies in the context of event-based surveillance in the animal health domain. We did not described World Health Organization surveillance programs as they mainly focus on zoonotic events from a public health perspective, in the indicator-based paradigm. Besides, our objective was to describe the EBS systems.

*Official sources on animal and human surveillance should not be test sources for the network as they are the gold standard for comparing sources of risk communication. In this study, official sources on animal and human surveillance are not tested by themselves. They appeared in the network because they were cited by non-official sources monitored by the EBS tools. For instance, if an online news source stated "According to the WHOA, an outbreak of avian influenza was detected yesterday in country X", WHOA was the emitter (primary) source of our network.*

*Qualitative nodes analysis: Reformulate or change the terms referring to primary and secondary data that cannot refer to the EBS tools technique because they are intrinsically used terms. The terms used must be from epidemiology.*

To our knowledge, this work is the first attempt to describe the dissemination of information between sources cited in online news in the context of health surveillance, and no specific terms were proposed to refer to such sources in the epidemiological context. Thus, we proposed the terms primary and secondary as they are explicit for the reader and reflect the temporal diffusion of the events.

*How sensitive/specific is the PADI web and Health Map data compared to the gold standard of data? Where are the statistical analyzes showing this fact?*

-We calculated the sensitivity of HealthMap and PADI-web, following the definition provided in section Methods. The specificity of event-based surveillance tools cannot be calculated, as it is impossible to assess the status of non-official events they detect; there may be false positive events, as well as true positive events not reported to the gold standard databases (WOAH and EMPRES-i). We did not provide any further statistical tests as the purpose of our study is not to evaluate the influence of factors in the sensitivity of the tools. Please check the approach and the results in lines 168-181 and 276-278.

*As for the geographic scope, it was not clear in the text to the national scope that the data refer. The data should cover the following variables: total number and frequencies of avian influenza events; mean, maximum and minimum value of the number of events monitored per epidemiological week; source and means of event notification; frequency of events monitored by region of occurrence and spatial distribution of events according to reference municipality; opportunity to notification; Closing opportunity (time interval between the date from the notification to the National Surveillance until the end of its monitoring) classification of the group of events according to means of transmission and risk classification after evaluation of the events*

For the data from EBS tools, we did not choose any national scope a priori: our data selection was solely based on the studied disease (avian influenza) and host (animals) worldwide. To clarify, we added a table summarizing the total number and frequencies of avian influenza events; mean, maximum and minimum value of the number of events monitored per week; and the source of the event notification as Supplementary material.
